# Supplementary material for: Genome-wide meta-analysis uncovers novel loci influencing circulating leptin levels
Source: PubMed Central journal article supplement (PMC4740377; doi:10.1038/ncomms10494), 2016-02-01
Supplement: ncomms10494-s1.pdf [file ncomms10494-s1.pdf]

## Supplementary Figures

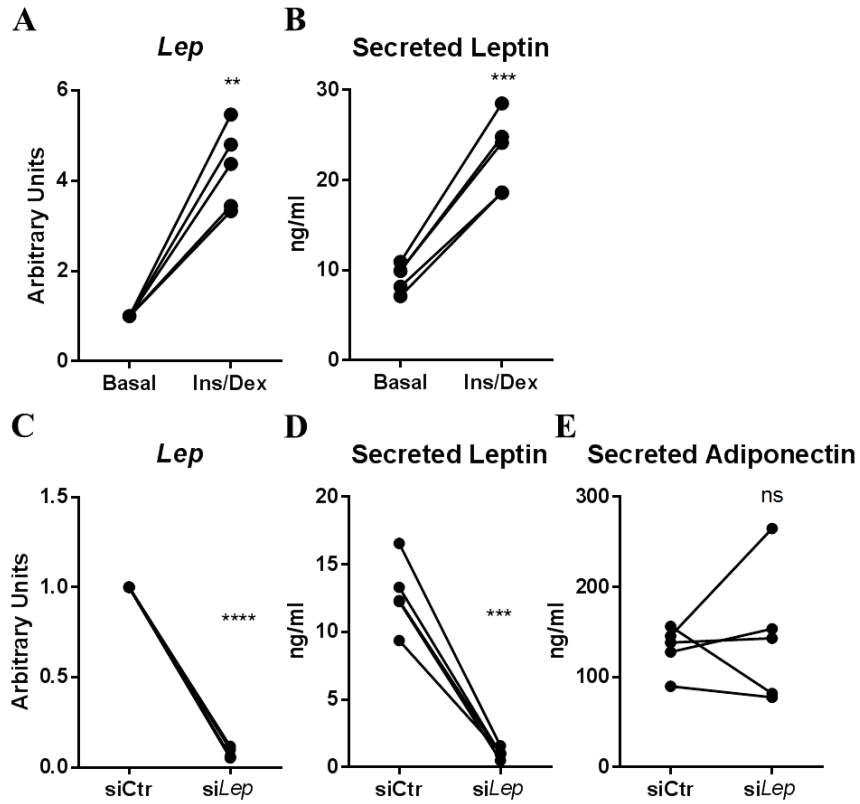

**Supplementary Fig. 1.** Effects of *Lep* knockdown on leptin transcription and secretion in perigonadal adipose tissue explants from mice fed with high fat diet. *Lep* transcription (A) and secretion (B) by explants in the basal or Ins/Dex stimulated state. N=5 mice per group. *Lep* knockdown (C) decreased LEP secretion (D) following stimulation with insulin and dexamethasone for 12 hours. Adiponectin secretion (E) remained unchanged. N=5 mice per group. Each point represents the average of 3 samples. 2 way repeated measures ANOVA. \*p<0.05, \*\*p<0.01, \*\*\*p<0.001, \*\*\*\*p<0.0001.

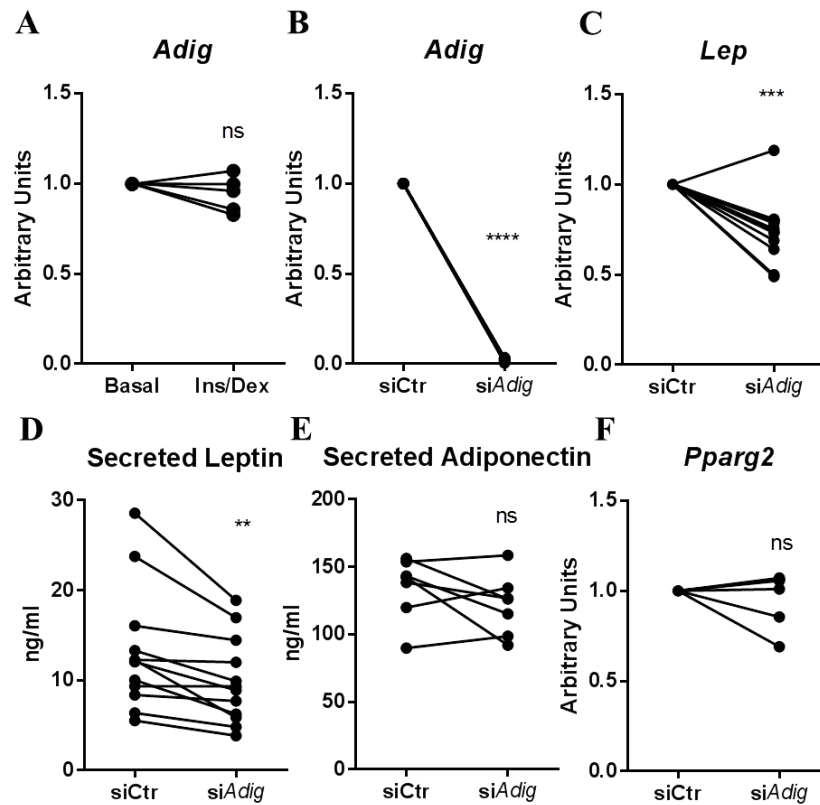

**Supplementary Fig. 2** Effects of *Adig* knockdown on leptin transcription and secretion in perigonadal adipose tissue explants from mice fed with high fat diet. *Adig* expression (A) by explants in the basal or Ins/Dex stimulated state. N=5 mice per group. *Adig* knockdown (B) decreased both *Lep* expression (C) and leptin secretion (D) following stimulation with insulin and dexamethasone for 12 hours. N=12 mice per group. Adiponectin secretion (E) remained unchanged. N=7 mice per group. *Pparg2* expression (F) was unchanged as well. N=6 mice per group. Each point represents the average of 3 samples. 2 way repeated measures ANOVA. \* $p < 0.05$ , \*\* $p < 0.01$ , \*\*\* $p < 0.001$ , \*\*\*\* $p < 0.0001$ .

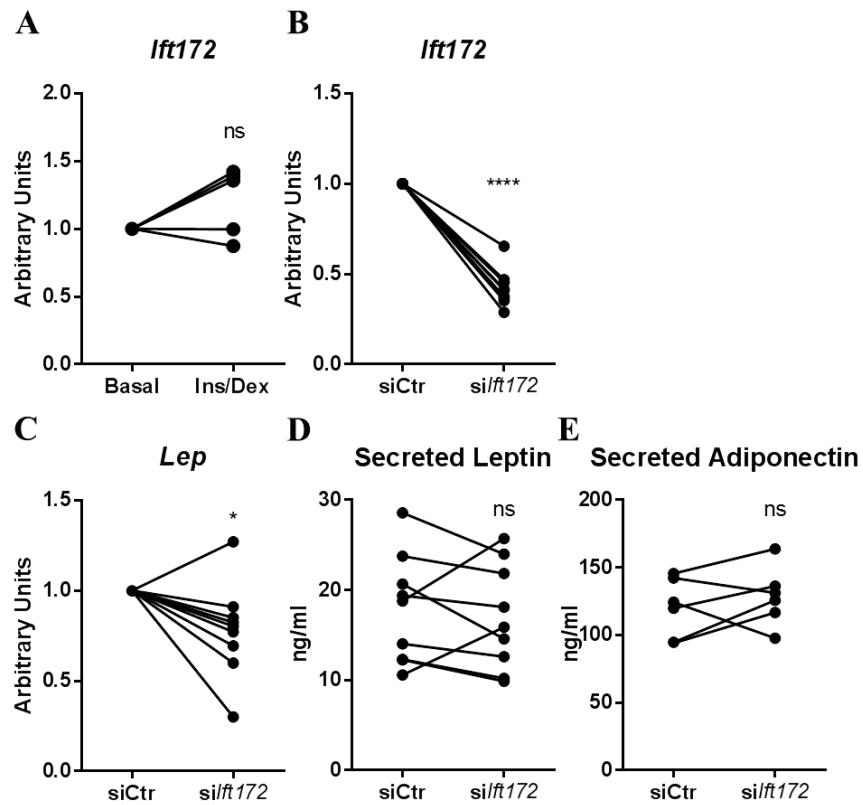

**Supplementary Fig. 3.** Effects of *Ift172* knockdown on leptin transcription and secretion in perigonadal adipose tissue explants from mice fed with high fat diet. *Ift172* expression (A) by explants in the basal or Ins/Dex stimulated state. N=5 mice per group. *Ift172* knockdown (B) decreased *Lep* expression (C) but did not change leptin secretion (D) following stimulation with insulin and dexamethasone for 12 hours. N=9 mice per group. Adiponectin secretion (E) remained unchanged. N=6 mice per group. Each point represents the average of 3 samples. 2 way repeated measures ANOVA. \* $p < 0.05$ , \*\* $p < 0.01$ , \*\*\* $p < 0.001$ , \*\*\*\* $p < 0.0001$ .

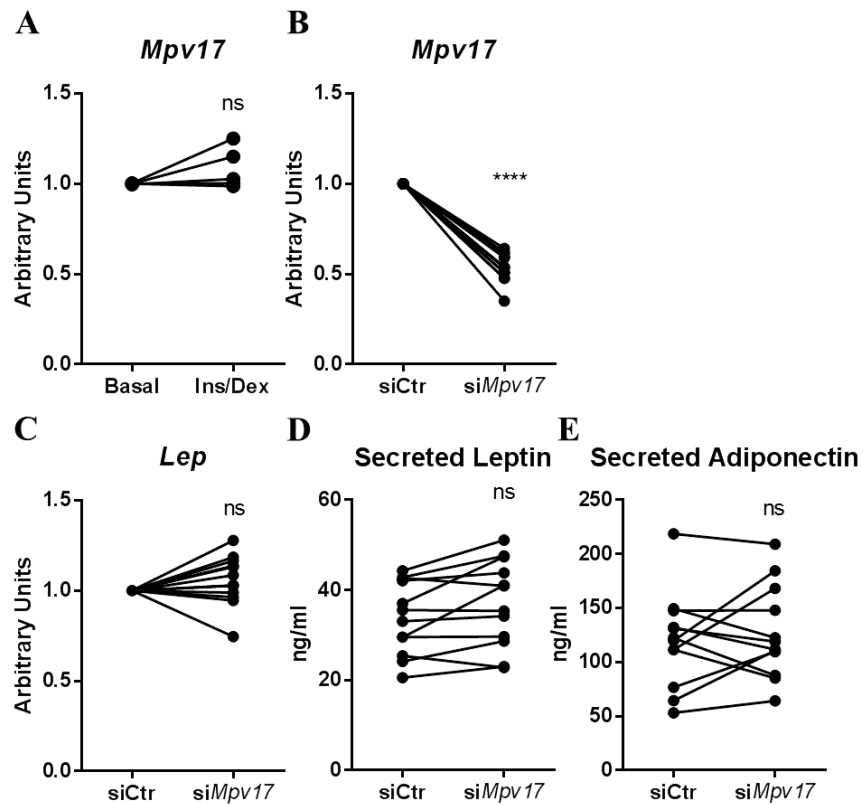

**Supplementary Fig. 4.** Effects of *Mpv17* knockdown on leptin transcription and secretion in perigonadal adipose tissue explants from mice fed with high fat diet. *Mpv17* expression (**A**) by explants in the basal or Ins/Dex stimulated state. N=5 mice per group. *Mpv17* knockdown (**B**) did not change *Lep* expression (**C**) or secretion (**D**) following stimulation with insulin and dexamethasone for 12 hours. Adiponectin secretion (**E**) remained unchanged. N=12 mice per group. Each point represents the average of 3 samples. 2 way repeated measures ANOVA. \*p<0.05, \*\*p<0.01, \*\*\*p<0.001, \*\*\*\*p<0.0001.

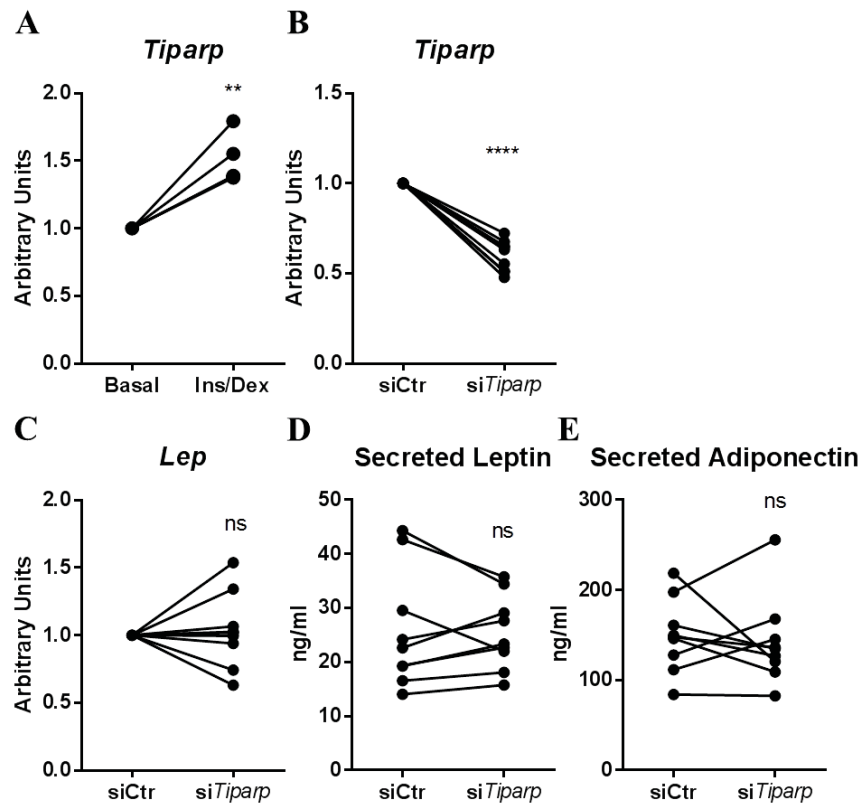

**Supplementary Fig. 5.** Effects of *Tiparp* knockdown on leptin transcription and secretion in perigonadal adipose tissue explants from mice fed with high fat diet. *Tiparp* expression (A) by explants in the basal or Ins/Dex stimulated state. N=5 mice per group. *Tiparp* knockdown (B) did not change *Lep* expression (C) or secretion (D) following stimulation with insulin and dexamethasone for 12 hours. Adiponectin secretion (E) remained unchanged. N=9 mice per group. Each point represents the average of 3 samples. 2 way repeated measures ANOVA. \*p<0.05, \*\*p<0.01, \*\*\*p<0.001, \*\*\*\*p<0.0001.

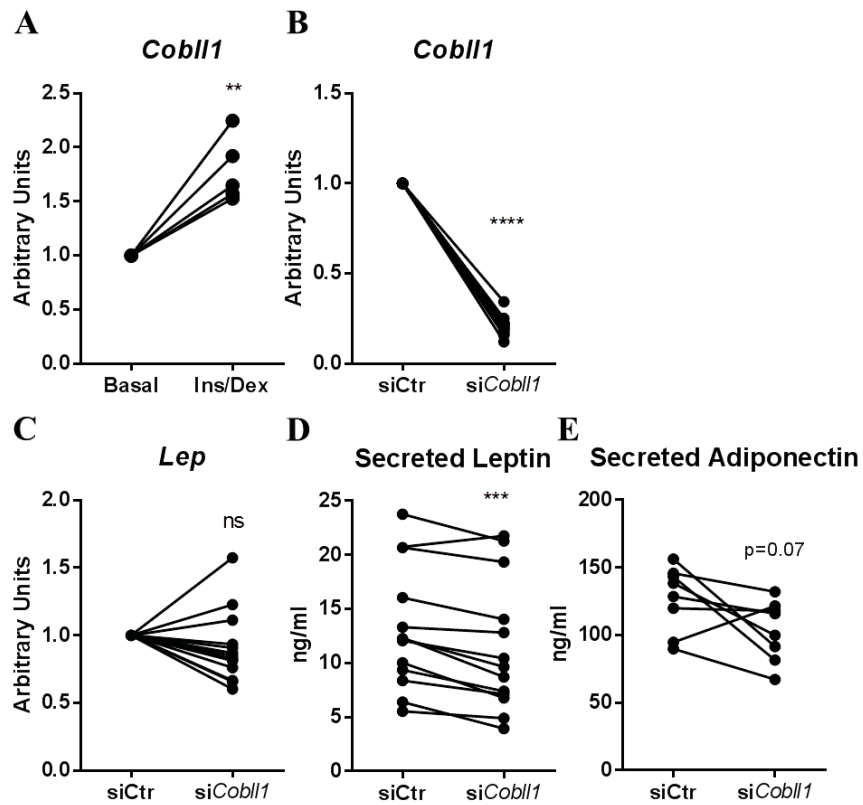

**Supplementary Fig. 6.** Effects of *Cobll1* knockdown on leptin transcription and secretion in perigonadal adipose tissue explants from mice fed with high fat diet. *Cobll1* expression (A) by explants in the basal or Ins/Dex stimulated state. N=5 mice per group. *Cobll1* knockdown (B) did not change *Lep* expression (C) but decreased *Lep* secretion (D) following stimulation with insulin and dexamethasone for 12 hours. N=13 mice per group. Adiponectin secretion (E) remained unchanged. N=8 mice per group. Each point represents the average of 3 samples. 2 way repeated measures ANOVA. \* $p < 0.05$ , \*\* $p < 0.01$ , \*\*\* $p < 0.001$ , \*\*\*\* $p < 0.0001$ .

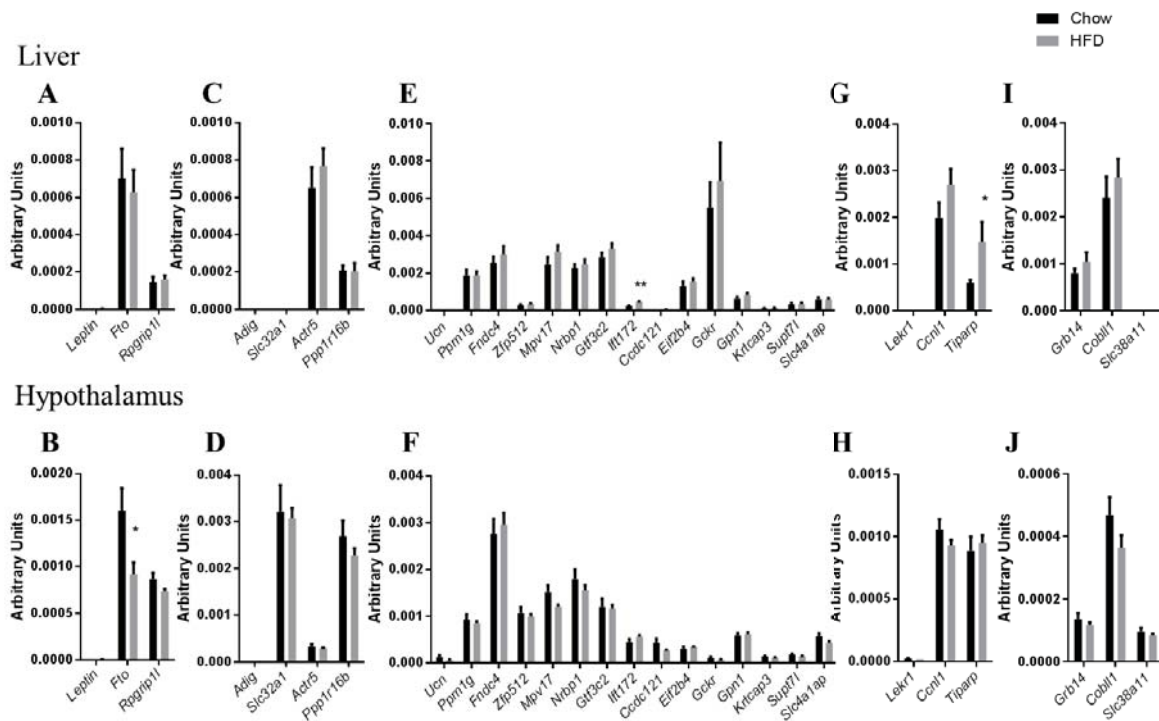

**Supplementary Fig. 7.** Expression of murine homologs of genes located within *Lep* (A, B), *Slc32a1* (C, D), *Gckr* (E, F), *Ccn1* (G, H), and *Cobll1* loci (I, J) in liver and hypothalamus from 4 month old mice fed chow (black bars) or high fat diet (HFD; gray bars). qPCR transcripts were normalized using *ActB*, *36B4*, *Gapdh* and *Ppia* as housekeeping genes. N=5 mice per group. T-test. \*p<0.05, \*\*p<0.01.

## Supplementary Tables

**Supplementary Table 1.** Study design, number of individuals, and sample quality control in studies included in Stage 1 meta-analyses

| Study      |                                       | Study design     | Ethnicity      | Total sample size | Call rate | Sample QC other exclusions                                                                                                                                                     | Samples in analyses | Leptin measurement |                                                                                                                                   | Reference |
|------------|---------------------------------------|------------------|----------------|-------------------|-----------|--------------------------------------------------------------------------------------------------------------------------------------------------------------------------------|---------------------|--------------------|-----------------------------------------------------------------------------------------------------------------------------------|-----------|
| Short name | Full name                             |                  |                |                   |           |                                                                                                                                                                                |                     | Sample type        | Assay                                                                                                                             |           |
| BLSA       | Baltimore Longitudinal Study on Aging | Population-based | White European | 848               | ≥ 98.5%   | 1) Sex misspecification<br>2) Duplicates<br>3) Missing leptin data                                                                                                             | 532                 | Fasting Plasma     | ELISA (LINCO Research, St. Charles, MO)                                                                                           | 1         |
| COLAUS     | Cohorte Lausannoise                   | Population-based | Caucasian      | 5,406             | ≥ 90%     | 1) Ethnic outliers<br>2) Related individuals and duplicates<br>3) Missing leptin, BMI and fat mass data                                                                        | 4,926               | Fasting serum      | Sandwich enzyme-linked immunosorbent assay (Pathway diagnostics corporation, Los Angeles, CA, USA)                                | 2         |
| ERF        | Erasmus Rucphen Family Study          | Family-based     | White European | 3,000             | ≥ 95%     | 1) Missing DNA<br>2) Gender mismatch with typed X-linked markers<br>3) Excess autosomal heterozygosity<br>4) Ethnic outliers using IBS (95%)<br>5) Missing leptin measurements | 1,957               | Fasting plasma     | Custom made duplex assay (cat.#: N45ZA-1) of Meso Scale Discovery (MSD).                                                          | 3,4       |
| FamHS      | Family Heart Study                    | Family Based     | White European | 3,880             | ≥ 98%     | 1) Ethnic outliers<br>2) Related individuals and duplicates<br>3) Missing leptin data                                                                                          | 1,505               | Plasma             | Human Leptin RIA Kit (LINCO Research)                                                                                             | 5,6       |
| Fenland    | Fenland Study                         | Population-based | White European | 1,500             | ≥ 95%     | 1) Heterozygosity <27.3% or >28.8%;<br>2) Duplicate check;<br>3) Relatedness check<br>4) Missing leptin data                                                                   | 1,397               | Fasting serum      | In-house two-site microtitre plate-based DELFIA assay. Antibodies & Standards from R&D Systems (R&D Systems Europe, Abingdon UK). | 7,8       |



| Study       |                                                        | Study design                  | Ethnicity               | Total sample size | Call rate | Sample QC other exclusions                                                                                                                                                                                                | Samples in analyses | Leptin measurement |                                                                                                    | References |
|-------------|--------------------------------------------------------|-------------------------------|-------------------------|-------------------|-----------|---------------------------------------------------------------------------------------------------------------------------------------------------------------------------------------------------------------------------|---------------------|--------------------|----------------------------------------------------------------------------------------------------|------------|
| Short name  | Full name                                              |                               |                         |                   |           |                                                                                                                                                                                                                           |                     | Sample type        | Assay                                                                                              |            |
| FINRISK97   | The Example Study                                      | Population-based              | White European: Finnish | 583               | ≥ 95%     | 1) Heterozygosity, gender check and relatedness checks have been performed and any discrepancies have been removed.<br>2) Missing phenotype                                                                               | 520                 | Semi-fasting serum | ELISA (R&D)                                                                                        | 9          |
| GEMS        | Genetic Etiology of Metabolic Syndrome                 | Case-control for dyslipidemia | White European          | 1,789             | ≥ 90%     | 1) Gender inconsistency with genetic data from X-lined markers<br>2) Inconsistent genotypes when compared with control markers<br>3) Duplicates and first and second degree relatives<br>4) Missing phenotype or genotype | 1,623               | Fasting serum      | ELISA (American Lab Products Company, Windham, NH)                                                 | 10         |
| GOOD        | Gothenburg Osteoporosis and Obesity Determinants study | Population-based              | White European          | 941               | ≥ 97.5%   | 1) Excessive heterozygosity<br>2) Ethnic outliers<br>3) Related individuals and duplicates<br>4) Sex mismatch<br>5) Missing leptin data                                                                                   | 938                 | Non-fasting serum  | Commercially available kit (Diagnostic Systems Laboratories Inc., Webster, TX; interassay CV 5.3%) | 11         |
| H2000 CASES | Health 2000 cases                                      | Case-control                  | White European: Finnish | 1,022             | ≥ 95%     | 1) Heterozygosity, gender check and relatedness checks have been performed and any discrepancies have been removed.<br>2) Missing phenotype.                                                                              | 991                 | Serum              | ELISA (R&D)                                                                                        | 12         |
| H2000 CTRLS | Health 2000 controls                                   | Case-control                  | White European: Finnish | 1,081             | ≥ 95%     | 1) Heterozygosity, gender check and relatedness checks have been performed and any discrepancies have been removed.<br>2) Missing phenotype.                                                                              | 1032                | Serum              | ELISA (R&D)                                                                                        | 12         |
| HBCS        | Helsinki Birth Cohort Study                            | Birth-cohort                  | White European: Finnish | 1,872             | ≥ 95%     | 1) Heterozygosity, gender check and relatedness checks have been performed and any discrepancies have been removed.<br>2) Missing phenotype.                                                                              | 1605                | Fasting serum      | Immunoassay (Millipore, Luminex platform, 2008 Millipore Corporation, Billerica, MA, U.S.A.)       | 13         |

| Study           |                                                                     | Study design                                                                        | Ethnicity               | Total sample size | Call rate | Sample QC<br>other exclusions                                                                                                                                                                                                                                                                | Samples in analyses | Leptin measurement |                                                                                                                                                                                              | References |
|-----------------|---------------------------------------------------------------------|-------------------------------------------------------------------------------------|-------------------------|-------------------|-----------|----------------------------------------------------------------------------------------------------------------------------------------------------------------------------------------------------------------------------------------------------------------------------------------------|---------------------|--------------------|----------------------------------------------------------------------------------------------------------------------------------------------------------------------------------------------|------------|
| Short name      | Full name                                                           |                                                                                     |                         |                   |           |                                                                                                                                                                                                                                                                                              |                     | Sample type        | Assay                                                                                                                                                                                        |            |
| NHS             | Nurses' Health Study                                                | Prospective nested case-control studies of type 2 diabetes and breast cancer (CGEM) | White European          | 5,573             | ≥95%      | 1) Missing call rate ≥2%<br>2) Presence of gross chromosomal anomalies<br>3) Ethnic outliers<br>4) Related individuals and duplicates<br>5) Missing leptin data                                                                                                                              | 2,129               | Plasma             | Diabetes case-control study: Radioimmunoassay (EMD Millipore, Billerica, MA)<br>Breast cancer case-control study (CGEM): enzyme-linked immunosorbent assay (Diagnostic Systems, Webster, TX) | 18,19,20   |
| QFS             | Quebec Family Study                                                 | Population-based                                                                    | White, French Canadian  | 951               | ≥95%      | 1) Missing leptin data                                                                                                                                                                                                                                                                       | 583                 | Fasting serum      | Radioimmunoassay (Linco, St. Charles, MO)                                                                                                                                                    | 21         |
| RISC            | Relationship between Insulin Sensitivity and Cardiovascular Disease | Population-based                                                                    | White European          | 1,566             | ≥95%      | 1) Non-European descent<br>2) Sex mismatches                                                                                                                                                                                                                                                 | 1,031               | Fasting serum      | Two-step time-resolved fluorometric assays of the 1235 AutoDELFLIA (PerkinElmer Lifesciences, Boston, MA) automatic immunoassay system                                                       | 22,23      |
| Rotterdam study | Rotterdam study                                                     | Population-based                                                                    | White European          | 3,932             | ≥97.5%    | 1) gender mismatch with typed X-linked markers;<br>2) excess autosomal heterozygosity ( $F < 0.055$ );<br>3) duplicates and/or 1st degree relatives using IBD PIHAT >40% from PLINK;<br>4) ethnic outliers IBS distances > 4SD mean HaMAP CEU cluster from PLINK;<br>5) Missing leptin data. | 955                 | Fasting serum      | Radioimmunoassay                                                                                                                                                                             | 24,25,26   |
| TwinsUK         | TwinsUK                                                             | Twin cohort                                                                         | White European          | 5,654             | ≥98%      | 1) Heterozygosity >2sd from the sample mean<br>2) Ethnic outliers<br>3) Missing leptin data                                                                                                                                                                                                  | 2,690               | Fasting serum      | Radioimmunoassay (Linco Research, St Louis, MO)                                                                                                                                              | 27         |
| YFS             | The Cardiovascular Risk in Young Finns Study                        | Population-based                                                                    | White European; Finnish | 2,556             | ≥95%      | 1) Heterozygosity, gender check and relatedness checks have been performed and any discrepancies have been removed.<br>2) Missing phenotype.                                                                                                                                                 | 2,085               | Serum              | Radioimmunoassay (Human Leptin RIA kit, Linco Research, Inc., MO, USA)                                                                                                                       | 28         |

**Supplementary Table 2.** Meta-analysis results in men and women combined for the leptin-associated loci that were taken forward for Stage 2

| SNP        | Nearest gene   | CHR | Pos       | Effect allele | Other allele | EAF  | Leptin unadjusted for BMI |       |         |       |           |       | Leptin adjusted for BMI |       |         |       |           |       |       |       |         |       |
|------------|----------------|-----|-----------|---------------|--------------|------|---------------------------|-------|---------|-------|-----------|-------|-------------------------|-------|---------|-------|-----------|-------|-------|-------|---------|-------|
|            |                |     |           |               |              |      | Stage 1                   |       | Stage 2 |       | Stage 1+2 |       | Stage 1                 |       | Stage 2 |       | Stage 1+2 |       |       |       |         |       |
|            |                |     |           |               |              |      | P                         | N     | P       | N     | Beta      | SE    | P                       | N     | P       | N     | Beta      | SE    | P     | N     |         |       |
| rs780093   | <i>GCKR</i>    | 2   | 27596107  | C             | T            | 0.61 | 1.8E-07                   | 32147 | 3.6E-04 | 19979 | 0.032     | 0.005 | 2.3E-10                 | 52126 | 6.3E-07 | 31802 | 1.4E-04   | 19648 | 0.024 | 0.004 | 3.8E-10 | 51450 |
| rs6738627  | <i>COBLL1</i>  | 2   | 165252696 | A             | G            | 0.37 | 8.3E-07                   | 25573 | 8.6E-02 | 19573 | 0.027     | 0.006 | 1.4E-06                 | 45146 | 4.6E-06 | 25229 | 4.5E-02   | 19242 | 0.020 | 0.004 | 1.9E-06 | 44471 |
| rs900400   | <i>CCNL1</i>   | 3   | 158281469 | T             | C            | 0.60 | 7.3E-07                   | 32128 | 1.7E-03 | 19685 | 0.030     | 0.005 | 5.6E-09                 | 51813 | 9.8E-07 | 31785 | 1.7E-02   | 19354 | 0.021 | 0.004 | 1.2E-07 | 51139 |
| rs1738457  | <i>MDGA1</i>   | 6   | 37661173  | C             | T            | 0.45 | 9.8E-03                   | 29467 | 9.1E-01 | 17409 | 0.011     | 0.005 | 3.6E-02                 | 46876 | 2.7E-02 | 29252 | 3.2E-01   | 17078 | 0.005 | 0.004 | 2.6E-01 | 46330 |
| rs10487505 | <i>LEP</i>     | 7   | 127647399 | G             | C            | 0.50 | 4.0E-06                   | 29470 | 2.0E-01 | 17110 | 0.023     | 0.005 | 9.0E-06                 | 46580 | 2.7E-11 | 29255 | 5.2E-03   | 16781 | 0.029 | 0.004 | 2.0E-12 | 46036 |
| rs8043757  | <i>FTO</i>     | 16  | 52370951  | T             | A            | 0.40 | 8.8E-08                   | 32120 | 2.7E-03 | 19919 | 0.030     | 0.005 | 1.1E-09                 | 52039 | 6.1E-01 | 31776 | 7.5E-01   | 19588 | 0.001 | 0.004 | 8.4E-01 | 51364 |
| rs6071166  | <i>SLC32A1</i> | 20  | 36766426  | C             | A            | 0.37 | 2.0E-07                   | 29471 | 1.6E-01 | 17007 | 0.027     | 0.006 | 6.6E-07                 | 46478 | 2.9E-08 | 29256 | 3.9E-02   | 16678 | 0.024 | 0.004 | 1.8E-08 | 45934 |

Leptin ( $\mu\text{g/ml}$ ) was logarithmically transformed. The study-specific analyses were performed with linear regression models while accounting for sex, age and age<sup>2</sup>. Meta-analyses of the study-specific results were performed using fixed effects meta-analysis. Beta refers to the change in logarithmically transformed leptin per each copy of the effect allele. The near *MDGA1* locus was taken forward from the stage 1 meta-analyses for women (**Supplementary Table 4**).

Beta, change in logarithmically transformed leptin per each copy of the effect allele; EAF, effect allele frequency

**Supplementary Table 3.** Meta-analysis results in men for the leptin-associated loci that were taken forward for Stage 2.

| SNP        | Nearest gene   | CHR | Pos       | Effect allele | Other allele | EAF  | Leptin unadjusted for BMI |       |         |      |           |        | Leptin adjusted for BMI |       |         |       |           |      |        |        |         |       |
|------------|----------------|-----|-----------|---------------|--------------|------|---------------------------|-------|---------|------|-----------|--------|-------------------------|-------|---------|-------|-----------|------|--------|--------|---------|-------|
|            |                |     |           |               |              |      | Stage 1                   |       | Stage 2 |      | Stage 1+2 |        | Stage 1                 |       | Stage 2 |       | Stage 1+2 |      |        |        |         |       |
|            |                |     |           |               |              |      | P                         | N     | P       | N    | Beta      | SE     | P                       | N     | P       | N     | Beta      | SE   | P      | N      |         |       |
| rs780093   | <i>GCKR</i>    | 2   | 27596107  | C             | T            | 0.61 | 1.0E-02                   | 13463 | 3.8E-03 | 9848 | 0.029     | 0.0076 | 1.3E-04                 | 23311 | 5.0E-02 | 13177 | 2.8E-04   | 9693 | 0.024  | 0.0061 | 1.1E-04 | 22870 |
| rs6738627  | <i>COBLL1</i>  | 2   | 165252696 | A             | G            | 0.37 | 1.0E-03                   | 10428 | 3.6E-01 | 9635 | 0.025     | 0.0085 | 3.4E-03                 | 20063 | 2.3E-03 | 10142 | 1.8E-01   | 9480 | 0.021  | 0.0068 | 2.3E-03 | 19622 |
| rs900400   | <i>CCNL1</i>   | 3   | 158281469 | T             | C            | 0.60 | 2.4E-02                   | 13463 | 3.6E-03 | 9705 | 0.029     | 0.0078 | 2.7E-04                 | 23168 | 1.6E-01 | 13177 | 9.6E-03   | 9550 | 0.018  | 0.0063 | 4.9E-03 | 22727 |
| rs1738457  | <i>MDGA1</i>   | 6   | 376661173 | C             | T            | 0.45 | 8.1E-02                   | 13460 | 2.6E-01 | 8511 | -0.005    | 0.0079 | 5.5E-01                 | 21971 | 4.3E-01 | 13174 | 8.6E-01   | 8354 | -0.003 | 0.0064 | 6.3E-01 | 21528 |
| rs10487505 | <i>LEP</i>     | 7   | 127647399 | G             | C            | 0.50 | 3.9E-02                   | 13463 | 9.9E-01 | 8384 | 0.012     | 0.0077 | 1.1E-01                 | 21847 | 2.4E-04 | 13177 | 1.2E-01   | 8229 | 0.024  | 0.0062 | 1.5E-04 | 21406 |
| rs8043757  | <i>FTO</i>     | 16  | 52370951  | T             | A            | 0.40 | 1.2E-06                   | 13463 | 8.2E-03 | 9825 | 0.041     | 0.0076 | 8.6E-08                 | 23288 | 3.9E-02 | 13177 | 2.1E-01   | 9670 | 0.014  | 0.0061 | 1.8E-02 | 22847 |
| rs6071166  | <i>SLC32A1</i> | 20  | 36766426  | C             | A            | 0.37 | 6.9E-04                   | 13462 | 7.6E-01 | 8311 | 0.022     | 0.0081 | 5.4E-03                 | 21773 | 1.1E-03 | 13176 | 2.1E-01   | 8156 | 0.021  | 0.0065 | 1.1E-03 | 21332 |

Leptin ( $\mu\text{g/ml}$ ) was logarithmically transformed. The study-specific analyses were performed with linear regression models while accounting for sex, age and age<sup>2</sup>. Meta-analyses of the study-specific results were performed using fixed effects meta-analysis. Beta refers to the change in logarithmically transformed leptin per each copy of the effect allele.

Beta, change in logarithmically transformed leptin per each copy of the effect allele; EAF, effect allele frequency

**Supplementary Table 4.** Meta-analysis results in women for the leptin-associated loci that were taken forward for Stage 2.

| SNP        | Nearest gene   | CHR | Pos       | Effect allele | Other allele | EAF  | Leptin unadjusted for BMI |       |         |       |           |        |         |       | Leptin adjusted for BMI |       |         |      |           |        |         |       |
|------------|----------------|-----|-----------|---------------|--------------|------|---------------------------|-------|---------|-------|-----------|--------|---------|-------|-------------------------|-------|---------|------|-----------|--------|---------|-------|
|            |                |     |           |               |              |      | Stage 1                   |       | Stage 2 |       | Stage 1+2 |        |         |       | Stage 1                 |       | Stage 2 |      | Stage 1+2 |        |         |       |
|            |                |     |           |               |              |      | P                         | N     | P       | N     | Beta      | SE     | P       | N     | P                       | N     | Beta    | SE   | P         | N      |         |       |
| rs780093   | <i>GCKR</i>    | 2   | 27596107  | C             | T            | 0.61 | 6.0E-06                   | 18684 | 3.1E-02 | 10131 | 0.033     | 0.0067 | 7.9E-07 | 28815 | 2.8E-06                 | 18625 | 7.3E-02 | 9955 | 0.025     | 0.0050 | 1.0E-06 | 28580 |
| rs6738627  | <i>COBLL1</i>  | 2   | 165252696 | A             | G            | 0.37 | 1.1E-04                   | 15145 | 1.1E-01 | 9938  | 0.029     | 0.0073 | 6.1E-05 | 25083 | 4.6E-04                 | 15087 | 1.3E-01 | 9762 | 0.020     | 0.0055 | 2.0E-04 | 24849 |
| rs900400   | <i>CCNL1</i>   | 3   | 158281469 | T             | C            | 0.60 | 2.9E-06                   | 18665 | 1.4E-01 | 9980  | 0.032     | 0.0068 | 3.3E-06 | 28645 | 8.1E-07                 | 18608 | 4.4E-01 | 9804 | 0.023     | 0.0051 | 9.4E-06 | 28412 |
| rs1738457  | <i>MDGA1</i>   | 6   | 37661173  | C             | T            | 0.45 | 7.9E-07                   | 16007 | 3.2E-01 | 8898  | 0.025     | 0.0072 | 6.4E-04 | 24905 | 4.0E-04                 | 16078 | 1.2E-01 | 8724 | 0.011     | 0.0055 | 5.1E-02 | 24802 |
| rs10487505 | <i>LEP</i>     | 7   | 127647399 | G             | C            | 0.50 | 1.8E-05                   | 16007 | 5.8E-02 | 8726  | 0.033     | 0.0071 | 4.1E-06 | 24733 | 1.4E-08                 | 16078 | 1.5E-02 | 8552 | 0.033     | 0.0054 | 1.2E-09 | 24630 |
| rs8043757  | <i>FTO</i>     | 16  | 52370951  | T             | A            | 0.40 | 1.6E-03                   | 18657 | 1.0E-01 | 10094 | 0.023     | 0.0066 | 4.5E-04 | 28751 | 4.8E-01                 | 18599 | 1.1E-01 | 9918 | -0.008    | 0.0050 | 1.3E-01 | 28517 |
| rs6071166  | <i>SLC32A1</i> | 20  | 36766426  | C             | A            | 0.37 | 1.0E-04                   | 16008 | 9.6E-02 | 8696  | 0.031     | 0.0074 | 3.7E-05 | 24704 | 1.3E-05                 | 16079 | 1.1E-01 | 8522 | 0.025     | 0.0057 | 7.5E-06 | 24601 |

Leptin ( $\mu\text{g/ml}$ ) was logarithmically transformed. The study-specific analyses were performed with linear regression models while accounting for sex, age and age<sup>2</sup>. Meta-analyses of the study-specific results were performed using fixed effects meta-analysis. Beta refers to the change in logarithmically transformed leptin per each copy of the effect allele.

Beta, change in logarithmically transformed leptin per each copy of the effect allele; EAF, effect allele frequency

**Supplementary Table 5.** Study design, number of individuals and sample quality control in studies included in Stage 2 meta-analyses.

| Study      |                                                                                    | Study design             | Ethnicity      | Total N | Sample QC |                                                                                                                                                                                 | N in analyses | Leptin measurement |                                                                                                                                      | Reference |
|------------|------------------------------------------------------------------------------------|--------------------------|----------------|---------|-----------|---------------------------------------------------------------------------------------------------------------------------------------------------------------------------------|---------------|--------------------|--------------------------------------------------------------------------------------------------------------------------------------|-----------|
| Short name | Full name                                                                          |                          |                |         | Call rate | other exclusions                                                                                                                                                                |               | Sample type        | Assay                                                                                                                                |           |
| BWHHS      | British Women's Heart & Health study                                               | Prospective Cohort study | White European | 4,286   | >90%      | Gender mismatch                                                                                                                                                                 | 500           | Fasting serum      | In-house (University of Glasgow) radioimmunoassay validated against the commercially available Linco assay.                          | 29        |
| Ely        | MRC Ely Study                                                                      | Population-based         | White European | 1,625   | ≥95%      | 1) missing phenotype data<br>2) gender check;<br>3) duplicates check;                                                                                                           | 1,595         | Fasting serum      | Two-step time-resolved fluorometric assays of the 1235 AutoDELFA (PerkinElmer Lifesciences, Boston, MA) automatic immunoassay system | 30        |
| GARP       | The Genetics of osteoARthritis and Progression study                               | Affected sibling pairs   | White European | 250     | >98%      | 1) MAF > 5%<br>2) missing leptin data<br>3) imputation quality score > 95                                                                                                       | 240           | Morning Serum      | Bio-Plex Pro Human Diabetes kit (Bio-Rad, USA), the Bio-plex array reader and Bio-plex software                                      | 31,32     |
| GLACIER    | Gene x Lifestyle interactions And Complex traits Involved in Elevated disease Risk | Population-based         | White European | 17698   | ≥95%      | 1) missing relevant phenotype data<br>2) missing all five SNPs for replication<br>3) self-reported diabetes<br>4) fasting and 2-hr glucose levels indicative of type 2 diabetes | 992           | Fasting serum      | Radioimmunoassay (Linco, St. Charles, MO, USA)                                                                                       | 33,34     |
| GOYA Male  | Genetics of Extremely Overweight Young Adults                                      | Population-based         | White European | 1,632   | ≥95%      | 1) heterozygosity <30.2% or >35%<br>2) discordance in SNP pairs when compared with previous project<br>3) ethnic outliers<br>4) related individuals and duplicates              | 467           | Fasting serum      | Fluro-immunometric assay with a Leptin RIA kit (Alt Diagnostica, Marburg, Germany)                                                   | 35        |

| Study       |                                                                              | Study design                                                                                                                                       | Ethnicity          | Total sample size | Call rate+F3 | Sample QC<br>other exclusions                                                                                                             | Samples in analyses | Leptin measurement |                                                                                                                              | References |
|-------------|------------------------------------------------------------------------------|----------------------------------------------------------------------------------------------------------------------------------------------------|--------------------|-------------------|--------------|-------------------------------------------------------------------------------------------------------------------------------------------|---------------------|--------------------|------------------------------------------------------------------------------------------------------------------------------|------------|
| Short name  | Full name                                                                    |                                                                                                                                                    |                    |                   |              |                                                                                                                                           |                     | Sample type        | Assay                                                                                                                        |            |
| LURIC       | Ludwigshafen Risk and Cardiovascular Health Study                            | Case-control                                                                                                                                       | White European     | 3,316             | ≥ 95%        | 1) related individuals and duplicates<br>2) missing leptin data<br>3) missing genotyping<br>4) sex ambiguity<br>5) cardiovascular disease | 599                 | Fasting plasma     | Human leptin RIA kit/LKB Valle 1277, γ Master, Uppsala, Sweden                                                               | 36         |
| MESA        | Multi-Ethnic Study of Atherosclerosis                                        | Population-based                                                                                                                                   | Non-Hispanic White | 6,814             | 95%          | 1) Ethnic outliers<br>2) Duplicates<br>3) Gender mismatch<br>4) Related individuals<br>5) Missing leptin data                             | 760                 | Fasting Serum      | Bio-Rad Luminox flow cytometry (Millepore, Billerica, MA).                                                                   | 37,38      |
| MrOS Sweden | The Osteoporotic Fractures in Men Sweden                                     | Population-based                                                                                                                                   | White European     | 962               | ≥ 97%        | 1) exclusion based on IBD clustering<br>2) ethnic outliers<br>3) related individuals and duplicates<br>4) missing leptin data             | 919                 | Fasting serum      | Commercially available kit (Diagnostic Systems Laboratories Inc., Webster, TX; interassay CV 5.3%)                           | 39         |
| PIVUS       | Prospective Investigation of the Vasculature in Uppsala Seniors              | Population-based                                                                                                                                   | White European     | 1,016             | ≥ 99%        | 1) heterozygosity<br>2) ethnic outliers<br>3) duplicates<br>4) gender discordance                                                         | 948                 | Fasting plasma     | Double-antibody radioimmunoassays (RIA) (Linco Research, St. Louis, MO, USA).                                                | 40         |
| PROSPER     | The PROspective Study of Pravastatin in Elderly at risk for vascular disease | Population-based                                                                                                                                   | White European     | 5,796             | >97.5        | 1) Excess of heterozygosity<br>2) Ethnic outliers,<br>3) Familial relationships<br>4) Gender mismatch<br>5) Missing leptin data           | 5,148               | Fasting plasma     | In-house RIA validated thoroughly against the commercially available Linco Research Co. (St. Charles, MO) assay              | 41         |
| WGHS        | Women's Genome Health Study                                                  | The WGHS is population-based. The WGHS sub-population with leptin measures was a nested case/cohort design subsample for incident type 2 diabetes. | White European     | 23,294            | ≥ 98%        | 1) age<45<br>2) prior CVD<br>3) cancer<br>4) DM<br>5) missing BMI                                                                         | 808                 | Fasting serum      | Ultra-sensitive ELISA assay, an enzymatically amplified "two-step" sandwich-type immunoassay (R&D Systems, Minneapolis, MN). |            |

**Supplementary Table 6.** Meta-analysis results for the leptin-associated loci when adjusting for BMI or body fat percentage.

| SNP        | Nearest gene   | CHR | Pos       | Effect allele | Other allele | EAF  | Leptin adj. BMI |        |         |       | Leptin adj. body fat percentage |        |         |       |
|------------|----------------|-----|-----------|---------------|--------------|------|-----------------|--------|---------|-------|---------------------------------|--------|---------|-------|
|            |                |     |           |               |              |      | Beta            | SE     | P       | N     | Beta                            | SE     | P       | N     |
| rs780093   | <i>GCKR</i>    | 2   | 27596107  | C             | T            | 0.60 | 0.017           | 0.0057 | 3.8E-03 | 21765 | 0.026                           | 0.0059 | 6.9E-06 | 18980 |
| rs6738627  | <i>COBLL1</i>  | 2   | 165252696 | A             | G            | 0.37 | 0.020           | 0.0071 | 5.2E-03 | 15192 | 0.014                           | 0.0073 | 5.2E-02 | 12532 |
| rs900400   | <i>CCNL1</i>   | 3   | 158281469 | T             | C            | 0.61 | 0.021           | 0.0059 | 3.3E-04 | 21748 | 0.024                           | 0.0060 | 9.2E-05 | 18966 |
| rs10487505 | <i>LEP</i>     | 7   | 127647399 | G             | C            | 0.49 | 0.034           | 0.0062 | 3.6E-08 | 19220 | 0.041                           | 0.0063 | 9.4E-11 | 16946 |
| rs8043757  | <i>FTO</i>     | 16  | 52370951  | T             | A            | 0.40 | 0.003           | 0.0058 | 5.9E-01 | 21740 | 0.000                           | 0.0059 | 9.8E-01 | 18960 |
| rs6071166  | <i>SLC32A1</i> | 20  | 36766426  | C             | A            | 0.38 | 0.035           | 0.0065 | 6.0E-08 | 19219 | 0.021                           | 0.0067 | 2.2E-03 | 16945 |

Leptin ( $\mu\text{g/ml}$ ) was logarithmically transformed. Only the studies that had data available of both BMI and body fat percentage were included. The study-specific analyses were performed with linear regression models while accounting for sex, age, age<sup>2</sup>, and BMI or body fat percentage. Meta-analyses of the study-specific results were performed using fixed effects meta-analysis. Beta refers to the change in logarithmically transformed leptin per each copy of the effect allele.

Beta, change in logarithmically transformed leptin per each copy of the effect allele; EAF, effect allele frequency



**Supplementary Table 7.** Association of leptin-associated loci with other traits in meta-analyses of GWAS.

| Trait                                             | rs780093 (GCKR) C allele |           |          |           | rs6738627 (COBLL1) A allele |           |          |          | rs900400 (CCN1) T allele |           |          |          | rs10487505 (LEP) G allele |           |          |          | rs6071166 (SLC32A1) C allele |           |          |          | Ref. |
|---------------------------------------------------|--------------------------|-----------|----------|-----------|-----------------------------|-----------|----------|----------|--------------------------|-----------|----------|----------|---------------------------|-----------|----------|----------|------------------------------|-----------|----------|----------|------|
|                                                   | $\beta$                  | SE        | N        | P value   | $\beta$                     | SE        | N        | P value  | $\beta$                  | SE        | N        | P value  | $\beta$                   | SE        | N        | P value  | $\beta$                      | SE        | N        | P value  |      |
| Body mass index <sup>1</sup>                      | 0.012                    | 0.003     | 321,115  | 2.28E-04  | 0.010                       | 0.003     | 267,719  | 3.78E-03 | 0.005                    | 0.004     | 233,872  | 1.77E-01 | -0.009                    | 0.004     | 221,677  | 2.53E-02 | 0.006                        | 0.004     | 233,392  | 1.27E-01 | 42   |
| Body fat percentage <sup>2</sup>                  | 0.005                    | 0.005     | 89,257   | 3.24E-01  | 0.030                       | 0.005     | 76,338   | 1.84E-08 | 0.004                    | 0.006     | 64,032   | 5.38E-01 | -0.002                    | 0.006     | 62,795   | 7.09E-01 | 0.011                        | 0.006     | 64,035   | 8.52E-02 | 45   |
| BMI-adjusted waist-hip ratio <sup>1</sup>         | -0.009                   | 0.004     | 209,080  | 4.90E-03  | -0.020                      | 0.004     | 174,672  | 2.20E-08 | 0.026                    | 0.004     | 141,215  | 5.90E-09 | -0.002                    | 0.004     | 130,812  | 6.30E-01 | 0.003                        | 0.005     | 142,286  | 4.10E-01 | 43   |
| Height <sup>1</sup>                               | 0.020                    | 0.003     | 253,171  | 9.60E-12  | 0.001                       | 0.003     | 197,773  | 7.20E-01 | -0.003                   | 0.003     | 252,995  | 4.20E-01 | 0.004                     | 0.003     | 240,862  | 1.70E-01 | -0.003                       | 0.003     | 250,810  | 3.50E-01 | 44   |
| Fasting glucose <sup>3</sup>                      | 0.027                    | 0.004     | ~58,074  | 2.90E-10  | -0.008                      | 0.004     | ~58,074  | 2.96E-02 | -0.004                   | 0.004     | ~58,074  | 3.71E-01 | 0.001                     | 0.004     | ~58,074  | 7.94E-01 | 0.004                        | 0.004     | ~58,074  | 3.40E-01 | 46   |
| Fasting insulin <sup>3</sup>                      | 0.014                    | 0.004     | ~51,750  | 1.98E-04  | -0.011                      | 0.004     | ~51,750  | 2.50E-03 | -0.005                   | 0.004     | ~51,750  | 2.06E-01 | -0.003                    | 0.004     | ~51,750  | 4.53E-01 | 0.003                        | 0.004     | ~51,750  | 4.62E-01 | 46   |
| Total cholesterol <sup>4</sup>                    | -                        | NA        | 100,176  | 5.46E-25  | -                           | NA        | 100,176  | 1.53E-03 | -                        | NA        | 100,184  | 2.20E-01 | -                         | NA        | 100,184  | 9.08E-01 | +                            | NA        | 98,656   | 6.80E-01 | 47   |
| High-density lipoprotein cholesterol <sup>4</sup> | +                        | NA        | 99,892   | 4.50E-02  | +                           | NA        | 99,892   | 2.47E-06 | -                        | NA        | 99,900   | 1.23E-03 | -                         | NA        | 99,900   | 6.47E-01 | -                            | NA        | 98,409   | 5.28E-01 | 47   |
| Low-density lipoprotein cholesterol <sup>4</sup>  | -                        | NA        | 95,446   | 2.41E-04  | -                           | NA        | 95,446   | 3.61E-04 | -                        | NA        | 95,454   | 5.24E-01 | -                         | NA        | 95,454   | 6.87E-01 | +                            | NA        | 93,999   | 5.27E-01 | 47   |
| Triglycerides <sup>4</sup>                        | -                        | NA        | 96,590   | 5.68E-124 | -                           | NA        | 96,590   | 4.43E-07 | +                        | NA        | 96,598   | 3.05E-02 | +                         | NA        | 96,598   | 5.07E-01 | +                            | NA        | 95,070   | 6.20E-01 | 47   |
| Systolic blood pressure <sup>5</sup>              | NA                       | NA        | ~69,395  | 3.48E-01  | NA                          | NA        | ~69,395  | 2.02E-01 | NA                       | NA        | ~69,395  | 3.51E-01 | NA                        | NA        | ~69,395  | 1.29E-01 | NA                           | NA        | ~69,395  | 3.30E-01 | 48   |
| Diastolic blood pressure <sup>5</sup>             | NA                       | NA        | ~69,395  | 5.43E-01  | NA                          | NA        | ~69,395  | 5.96E-01 | NA                       | NA        | ~69,395  | 2.72E-01 | NA                        | NA        | ~69,395  | 2.25E-01 | NA                           | NA        | ~69,395  | 4.61E-01 | 48   |
| Birth weight <sup>6</sup>                         | -0.004                   | 0.008     | ~28,636  | 6.50E-01  | -0.002                      | 0.010     | ~28,636  | 8.30E-01 | 0.073                    | 0.009     | ~28,636  | 1.20E-17 | -0.019                    | 0.008     | ~28,636  | 2.40E-02 | -0.005                       | 0.009     | ~28,636  | 5.60E-01 | 49   |
| Adiponectin <sup>7</sup>                          | 0.016                    | 0.004     | 29,336   | 4.50E-04  | 0.015                       | 0.005     | 20,653   | 7.94E-03 | -0.015                   | 0.005     | 29,340   | 1.84E-03 | 0.003                     | 0.004     | 29,084   | 5.74E-01 | 0.000                        | 0.005     | 29,165   | 9.34E-01 | 50   |
| Age at menarche <sup>8</sup>                      | -0.017                   | NA        | ~132,989 | 4.20E-03  | -0.003                      | NA        | ~132,989 | 7.10E-01 | 0.037                    | NA        | ~132,989 | 3.80E-10 | 0.003                     | NA        | ~132,989 | 5.90E-01 | 0.004                        | NA        | ~132,989 | 4.90E-01 | 51   |
| C-reactive protein <sup>9</sup>                   | -0.087                   | 0.006     | ~66,185  | 1.08E-41  | -0.002                      | 0.009     | ~66,185  | 8.40E-01 | 0.004                    | 0.007     | ~66,185  | 5.51E-01 | 0.005                     | 0.006     | ~66,185  | 3.99E-01 | -0.001                       | 0.007     | ~66,185  | 9.35E-01 | 52   |
| Carbohydrate intake (% of energy) <sup>10</sup>   | -0.034                   | 0.058     | ~37,537  | 5.70E-01  | -0.012                      | 0.063     | ~37,537  | 8.56E-01 | 0.085                    | 0.061     | ~37,537  | 1.69E-01 | 0.155                     | 0.057     | ~37,537  | 7.73E-03 | -0.022                       | 0.060     | ~37,537  | 7.18E-01 | 53   |
| Fat intake (% of energy) <sup>10</sup>            | 0.078                    | 0.047     | ~37,537  | 1.03E-01  | 0.132                       | 0.050     | ~37,537  | 8.88E-03 | 0.012                    | 0.049     | ~37,537  | 8.11E-01 | -0.077                    | 0.046     | ~37,537  | 9.99E-02 | -0.020                       | 0.049     | ~37,537  | 6.90E-01 | 53   |
| Protein intake (% of energy) <sup>10</sup>        | -0.053                   | 0.025     | ~37,537  | 3.86E-02  | -0.030                      | 0.027     | ~37,537  | 2.84E-01 | -0.009                   | 0.026     | ~37,537  | 7.54E-01 | -0.040                    | 0.025     | ~37,537  | 1.11E-01 | 0.053                        | 0.026     | ~37,537  | 4.93E-02 | 53   |
|                                                   | OR                       | 95% CI    | N        | P value   | OR                          | 95% CI    | N        | P value  | OR                       | 95% CI    | N        | P value  | OR                        | 95% CI    | N        | P value  | OR                           | 95% CI    | N        | P value  | Ref. |
| Risk of early-onset obesity <sup>6</sup>          | 0.97                     | 0.92-1.02 | ~13,848  | 1.91E-01  | 1.04                        | 0.99-1.11 | ~13,848  | 1.27E-01 | 1.00                     | 0.95-1.06 | ~13,848  | 9.04E-01 | 0.95                      | 0.90-1.00 | ~13,848  | 4.02E-02 | 1.02                         | 0.97-1.08 | ~13,848  | 4.91E-01 | 54   |
| Risk of type 2 diabetes <sup>11</sup>             | 1.06                     | 1.03-1.08 | 79,616   | 3.70E-06  | 0.95                        | 0.92-0.97 | 80,652   | 1.43E-05 | 0.97                     | 0.95-1.00 | 80,625   | 3.90E-02 | 1.00                      | 0.96-1.04 | 63,390   | 9.90E-01 | 1.01                         | 0.97-1.05 | 63,390   | 6.60E-01 | 55   |

For each locus, the effect allele is the leptin-increasing allele

<sup>1</sup> Association results for body mass index, BMI-adjusted waist-hip ratio, and height were obtained from the Genetic Investigation of Anthropometric Traits (GIANT) Consortium

<sup>2</sup> Association results for body fat percentage were obtained from the Body Composition Genetics Consortium (BCGC)

<sup>3</sup> Association results for fasting glucose and fasting insulin were obtained from the Meta-Analyses of Glucose and Insulin-Related Traits Consortium (MAGIC)

<sup>4</sup> Association results for HDL-, LDL-, and total cholesterol and triglycerides levels were obtained from the Global Lipids Genetics Consortium (GLGC)

<sup>5</sup> Association results for diastolic and systolic blood pressure were obtained from the International Consortium for Blood Pressure (ICBP)

<sup>6</sup> Association results for birth weight and risk of early-onset obesity were obtained from the Early Growth Genetics (EGG) consortium

<sup>7</sup> Association results for adiponectin levels were obtained from the ADIPOGen Consortium

<sup>8</sup> Association results for age at menarche were obtained from the ReproGen consortium

<sup>9</sup> Association results for C-reactive protein levels were obtained from the Cohorts for Heart and Aging Research in Genomic Epidemiology (CHARGE) consortium

<sup>10</sup> Association results for macronutrient intakes were obtained from the CHARGE consortium

<sup>11</sup> Association results for type 2 diabetes-risk were obtained from the Diabetes Genetics Replication and Meta-analysis (DIAGRAM) Consortium

**Supplementary Table 8.** Data used in *cis*-eQTL analyses.

| Study                 | Tissues ( <i>n</i> )                                                     | Genotype platform                                           | Gene expression platform                                                                                                  | Reference |
|-----------------------|--------------------------------------------------------------------------|-------------------------------------------------------------|---------------------------------------------------------------------------------------------------------------------------|-----------|
| Bariatric case series | Liver (n=567), Omental fat (n=742), Subcutaneous fat (n=610)             | Illumina 650K                                               | Custom Agilent 44,000 feature microarray composed of 39,280 oligonucleotide probes                                        | 56        |
| Cortical brain study  | Brain (n=193)                                                            | Affymetrix Human Mapping 500K                               | Illumina Human Mapping Refseq-8 Expression Beadchip                                                                       | 57        |
| MolOBB                | Abdominal adipose (n=54), Gluteal fat (n=65), Whole blood (n=68)         | Illumina 317K                                               | Affymetrix Human Genome U133 Plus 2.0 gene-expression microarrays (hgu133plus2 arrays) with 17,726 non-overlapping probes | 58        |
| MuTHER                | Lymphoblastoid cell line (n=778), Skin (n=667), Subcutaneous fat (n=776) | Illumina HumanHap300, HumanHap610Q, 1M-Duo, and 1.2M Duo 1M | Illumina Human HT-12 V3 Beadchip                                                                                          | 59        |

**Supplementary Table 9.** Association of the leptin-associated SNPs with *cis*-gene expression (*cis*-eQTLs)

| SNP       | Chr | Leptin-increasing allele | Tissue       | Gene           | $\beta$ for leptin | P for leptin | $P_{adj}^a$ for leptin SNP | Peak SNP <sup>b</sup> | $r^2$ <sup>c</sup> | P for peak | $P_{adj}^d$ for peak | Ref. |
|-----------|-----|--------------------------|--------------|----------------|--------------------|--------------|----------------------------|-----------------------|--------------------|------------|----------------------|------|
|           |     |                          |              |                | SNP                | SNP          | SNP                        |                       |                    | SNP        | SNP                  |      |
| rs780093  | 2   | C                        | Liver        | <i>IFT172</i>  | 0.041              | 7.51E-30     | 1.20E-01                   | rs1260342             | 0.41               | 4.31E-101  | 3.70E-41             | 56   |
|           |     |                          | Liver        | <i>KRTCAP3</i> | 0.029              | 6.76E-06     | 3.70E-01                   | rs1260342             | 0.41               | 2.10E-17   | 2.65E-08             | 56   |
|           |     |                          | Liver        | <i>GCKR</i>    | -0.023             | 4.44E-05     | NA                         | NA                    | NA                 | NA         | NA                   | 56   |
|           |     |                          | Omental      | <i>IFT172</i>  | 0.089              | 6.49E-64     | 9.20E-01                   | rs1647276             | 0.45               | 7.63E-220  | 1.17E-69             | 56   |
|           |     |                          | Omental      | <i>KRTCAP3</i> | 0.018              | 2.05E-05     | 1.08E-01                   | rs780110              | 0.45               | 1.22E-18   | 3.89E-09             | 56   |
|           |     |                          | Subcutaneous | <i>IFT172</i>  | 0.084              | 2.70E-52     | 8.69E-01                   | rs1260342             | 0.43               | 1.01E-188  | 1.37E-61             | 56   |
| rs6738627 | 2   | A                        | Omental      | <i>GRB14</i>   | -0.053             | 5.31E-12     | 9.81E-01                   | rs6717858             | 0.84               | 3.42E-14   | 2.07E-01             | 56   |
|           |     |                          | Subcutaneous | <i>GRB14</i>   | -0.042             | 3.12E-05     | 9.52E-01                   | rs10184004            | 0.78               | 1.66E-06   | 2.68E-01             | 56   |
| rs900400  | 3   | T                        | Subcutaneous | <i>TIPARP</i>  | -0.278             | 6.75E-58     | NA                         | rs900400              | 1                  | 6.75E-58   | NA                   | 59   |
|           |     |                          | Subcutaneous | <i>TIPARP</i>  | -0.099             | 7.51E-53     | 7.78E-01                   | rs10049090            | 0.94               | 5.90E-55   | 4.07E-01             | 56   |
| rs6071166 | 20  | C                        | Liver        | <i>ACTR5</i>   | 0.032              | 2.36E-10     | 7.42E-03                   | rs6028156             | 0.08               | 7.63E-46   | 1.77E-35             | 56   |

<sup>a</sup>P value for the leptin SNP after adjusting for the peak SNP

<sup>b</sup>Most significant SNP associated with the gene transcript

<sup>c</sup> $r^2$  between the leptin SNP and the peak SNP

<sup>d</sup>P value for the peak SNP after adjusting for the leptin SNP

**Supplementary Table 10.** Summary of knockdown of candidate genes and effects on leptin transcript and protein secretion in perigonadal adipose tissue explants from high fat diet-fed mice.

| Candidate gene knocked down | Candidate gene mRNA (AU) |         |         | <i>Lep</i> mRNA (AU) |         |         | Leptin protein (ng/ml) |         |         |
|-----------------------------|--------------------------|---------|---------|----------------------|---------|---------|------------------------|---------|---------|
|                             | Percent change (%)       | SEM (%) | p-value | Percent change (%)   | SEM (%) | p-value | Percent change (%)     | SEM (%) | p-value |
| <i>Lep</i> (n=5)            |                          |         |         | -92.3                | 1.3     | <0.0001 | -91.9                  | 1.2     | 0.0004  |
| <i>Adig</i> (n=12)          | -97.8                    | 0.3     | <0.0001 | -25.6                | 5.1     | 0.0004  | -23.3                  | 4.4     | 0.003   |
| <i>Ift177</i> (n=9)         | -57.9                    | 3.4     | <0.0001 | -21.9                | 8.6     | 0.02    | -2.2                   | 9       | 0.57    |
| <i>Mpv17</i> (n=12)         | -46.2                    | 2.4     | <0.0001 | 5.7                  | 4       | 0.18    | 9.7                    | 4       | 0.17    |
| <i>Tiparp</i> (n=9)         | -40.2                    | 2.9     | <0.0001 | 3.3                  | 9.2     | 0.72    | 4.3                    | 6.7     | 0.84    |
| <i>Cobll1</i> (n=13)        | -79.4                    | 1.5     | <0.0001 | -9.3                 | 7.4     | 0.23    | -16.2                  | 3.3     | 0.0003  |

**Supplementary Table 11.** Reported associations of leptin SNPs with complex traits in the NHGRI GWAS catalog.

| Leptin SNP (LS) | LS position | $r^2$ | Previously identified SNPs (PIS) | PIS position | PMID     | Disease/trait                                         | Previously reported gene(s) | LS effect allele | LS EAF | PIS effect allele | PIS EAF | PIS OR/ $\beta$ | Direction of effect for leptin-increasing allele (+/-) |       | Distance between LS and PIS |
|-----------------|-------------|-------|----------------------------------|--------------|----------|-------------------------------------------------------|-----------------------------|------------------|--------|-------------------|---------|-----------------|--------------------------------------------------------|-------|-----------------------------|
|                 |             |       |                                  |              |          |                                                       |                             |                  |        |                   |         |                 | P value                                                |       |                             |
| rs900400        | 158,281,469 | 0.97  | rs1482853                        | 156,798,473  | 23575227 | Adiposity in newborns                                 | <i>LEKRI, CCNLI</i>         | T                | 0.6    | C                 | 0.620   | .06             | +                                                      | 6E-21 | 302                         |
| rs900400        | 158,281,469 | 1.00  | rs900400                         | 156,798,775  | 23202124 | Birth weight                                          | <i>CCNLI</i>                | T                | 0.6    | T                 | 0.61    | .07             | +                                                      | 4E-38 | 0                           |
| rs900400        | 158,281,469 | 1.00  | rs900400                         | 156,798,775  | 20372150 | Birth weight                                          | <i>CCNLI, LEKRI</i>         | T                | 0.6    | T                 | NR      | .09             | +                                                      | 2E-35 | 0                           |
| rs780093        | 27,596,107  | 0.97  | rs780094                         | 27,594,741   | 24068962 | Calcium levels                                        | <i>GCKR</i>                 | C                | 0.61   | T                 | 0.42    | .02             | -                                                      | 1E-10 | 1366                        |
| rs780093        | 27,596,107  | 0.90  | rs1260326                        | 27,584,444   | 21943158 | Calcium levels factors                                | <i>GCKR</i>                 | C                | 0.61   | T                 | 0.40    | .08             | -                                                      | 2E-8  | 11663                       |
| rs780093        | 27,596,107  | 0.90  | rs1260326                        | 27,584,444   | 24097068 | Cholesterol, total                                    | <i>GCKR</i>                 | C                | 0.61   | T                 | 0.39    | .05             | -                                                      | 3E-42 | 11663                       |
| rs780093        | 27,596,107  | 0.90  | rs1260326                        | 27,584,444   | 20686565 | Cholesterol, total                                    | <i>GCKR</i>                 | C                | 0.61   | T                 | 0.41    | 1.91            | -                                                      | 7E-27 | 11663                       |
| rs780093        | 27,596,107  | 0.90  | rs1260326                        | 27,584,444   | 20383146 | Chronic kidney disease                                | <i>GCKR, IFT172, FNDC4</i>  | C                | 0.61   | T                 | 0.41    | .01             | -                                                      | 3E-14 | 11663                       |
| rs780093        | 27,596,107  | 0.90  | rs1260326                        | 27,584,444   | 21300955 | C-reactive protein                                    | <i>GCKR</i>                 | C                | 0.61   | T                 | NR      | .07             | N/A                                                    | 5E-40 | 11663                       |
| rs780093        | 27,596,107  | 0.97  | rs780094                         | 27,594,741   | 18439548 | C-reactive protein                                    | <i>GCKR</i>                 | C                | 0.61   | A                 | NR      | .14             | N/A                                                    | 7E-15 | 1366                        |
| rs780093        | 27,596,107  | 1.00  | rs780093                         | 27,596,107   | 21102463 | Crohn's disease                                       | <i>GCKR</i>                 | C                | 0.61   | T                 | 0.418   | 1.15            | -                                                      | 5E-11 | 0                           |
| rs780093        | 27,596,107  | 0.97  | rs780094                         | 27,594,741   | 20081858 | Fasting glucose                                       | <i>GCKR</i>                 | C                | 0.61   | C                 | 0.62    | NR              | +                                                      | 6E-38 | 1366                        |
| rs780093        | 27,596,107  | 0.97  | rs780094                         | 27,594,741   | 20081858 | Fasting insulin                                       | <i>GCKR</i>                 | C                | 0.61   | C                 | 0.62    | NR              | +                                                      | 4E-20 | 1366                        |
| rs780093        | 27,596,107  | 0.97  | rs780094                         | 27,594,741   | 20081858 | HOMA-IR                                               | <i>GCKR</i>                 | C                | 0.61   | C                 | 0.62    | NR              | +                                                      | 3E-24 | 1366                        |
| rs780093        | 27,596,107  | 0.97  | rs780094                         | 27,594,741   | 22581228 | Fasting glucose-related traits (interaction with BMI) | <i>GCKR</i>                 | C                | 0.61   | NR                | NR      | NR              | N/A                                                    | 4E-24 | 1366                        |
| rs780093        | 27,596,107  | 0.97  | rs780094                         | 27,594,741   | 22581228 | Fasting insulin-related traits (interaction with BMI) | <i>GCKR</i>                 | C                | 0.61   | NR                | NR      | NR              | N/A                                                    | 3E-10 | 1366                        |
| rs780093        | 27,596,107  | 0.90  | rs1260326                        | 27,584,444   | 23903356 | Fasting plasma glucose in pregnancy                   | <i>GCKR</i>                 | C                | 0.61   | T                 | 0.409   | .00             | -                                                      | 6E-13 | 11663                       |
| rs780093        | 27,596,107  | 0.90  | rs1260326                        | 27,584,444   | 23903356 | Fasting C-peptide in pregnancy                        | <i>GCKR</i>                 | C                | 0.61   | T                 | 0.409   | .01             | -                                                      | 6E-11 | 11663                       |
| rs780093        | 27,596,107  | 0.90  | rs1260326                        | 27,584,444   | 20139978 | Hematological and biochemical traits                  | <i>GCKR</i>                 | C                | 0.61   | C                 | 0.44    | .09             | -                                                      | 4E-9  | 11663                       |

| Leptin SNP (LS) | LS position | $r^2$ | Previously identified SNPs (PIS) | PIS position | PMID     | Disease/trait                                                 | Previously reported gene(s)                                        | LS effect allele | LS EAF | PIS effect allele | PIS EAF | OR/ $\beta$ | Direction of effect for leptin-increasing allele (+/-) | P value | Distance between LS and PIS |
|-----------------|-------------|-------|----------------------------------|--------------|----------|---------------------------------------------------------------|--------------------------------------------------------------------|------------------|--------|-------------------|---------|-------------|--------------------------------------------------------|---------|-----------------------------|
| rs780093        | 27,596,107  | 0.90  | rs1260326                        | 27,584,444   | 23505323 | Hypertriglyceridemia                                          | <i>ZNF512, PPM1G, NRBP1, KRTCAP3, IFT172, GCKR, FNDC4, C2orf16</i> | C                | 0.61   | NR                | 0.26    | 1.41        | -                                                      | 2E-13   | 11663                       |
| rs780093        | 27,596,107  | 0.90  | rs1260326                        | 27,584,444   | 20657596 | Hypertriglyceridemia                                          | <i>GCKR</i>                                                        | C                | 0.61   | T                 | 0.41    | 1.75        | -                                                      | 7E-9    | 11663                       |
| rs780093        | 27,596,107  | 0.97  | rs780094                         | 27,594,741   | 18179892 | LDL cholesterol                                               | <i>GCKR</i>                                                        | C                | 0.61   | T                 | 0.39    | NR          | -                                                      | 5E-7    | 1366                        |
| rs780093        | 27,596,107  | 0.90  | rs1260326                        | 27,584,444   | 19936222 | Lipid metabolism phenotypes (triglycerides by assay, fasting) | <i>GCKR</i>                                                        | C                | 0.61   | NR                | NR      | .08         | N/A                                                    | 4E-32   | 11663                       |
| rs780093        | 27,596,107  | 0.90  | rs1260326                        | 27,584,444   | 19936222 | Lipid metabolism phenotypes (triglycerides by assay)          | <i>GCKR</i>                                                        | C                | 0.61   | NR                | NR      | .07         | N/A                                                    | 1E-37   | 11663                       |
| rs780093        | 27,596,107  | 0.90  | rs1260326                        | 27,584,444   | 19936222 | Lipid metabolism phenotypes (triglycerides by NMR, fasting)   | <i>GCKR</i>                                                        | C                | 0.61   | NR                | NR      | .06         | N/A                                                    | 3E-29   | 11663                       |
| rs780093        | 27,596,107  | 0.90  | rs1260326                        | 27,584,444   | 19936222 | Lipid metabolism phenotypes (triglycerides by NMR)            | <i>GCKR</i>                                                        | C                | 0.61   | NR                | NR      | .05         | N/A                                                    | 3E-35   | 11663                       |
| rs780093        | 27,596,107  | 0.90  | rs1260326                        | 27,584,444   | 19936222 | Lipid metabolism phenotypes (VLDL large)                      | <i>GCKR</i>                                                        | C                | 0.61   | NR                | NR      | .36         | N/A                                                    | 4E-24   | 11663                       |
| rs780093        | 27,596,107  | 0.90  | rs1260326                        | 27,584,444   | 19936222 | Lipid metabolism phenotypes (VLDL large, fasting)             | <i>GCKR</i>                                                        | C                | 0.61   | NR                | NR      | .34         | N/A                                                    | 3E-28   | 11663                       |
| rs780093        | 27,596,107  | 0.90  | rs1260326                        | 27,584,444   | 22001757 | Liver enzyme levels (gamma-glutamyl transferase)              | <i>C2orf16, GCKR</i>                                               | C                | 0.61   | T                 | 0.38    | 3.20        | -                                                      | 4E-13   | 11663                       |
| rs780093        | 27,596,107  | 0.97  | rs780094                         | 27,594,741   | 22399527 | Metabolic syndrome                                            | <i>GCKR</i>                                                        | C                | 0.61   | A                 | 0.36    | .13         | -                                                      | 6E-20   | 1366                        |
| rs780093        | 27,596,107  | 0.90  | rs1260326                        | 27,584,444   | 19060910 | Metabolic traits                                              | <i>GCKR</i>                                                        | C                | 0.61   | A                 | 0.35    | .09         | -                                                      | 4E-10   | 11663                       |
| rs780093        | 27,596,107  | 0.97  | rs780094                         | 27,594,741   | 21886157 | Metabolic traits                                              | <i>GCKR</i>                                                        | C                | 0.61   | T                 | 0.399   | .10         | -                                                      | 6E-53   | 1366                        |
| rs780093        | 27,596,107  | 0.90  | rs1260326                        | 27,584,444   | 22916037 | Metabolite levels                                             | <i>GCKR</i>                                                        | C                | 0.61   | NR                | 0.36    | NR          | -                                                      | 1E-12   | 11663                       |
| rs780093        | 27,596,107  | 0.90  | rs1260326                        | 27,584,444   | 22286219 | Metabolite levels                                             | <i>GCKR</i>                                                        | C                | 0.61   | NR                | NR      | .15         | N/A                                                    | 3E-18   | 11663                       |
| rs780093        | 27,596,107  | 0.90  | rs1260326                        | 27,584,444   | 22558069 | Non-albumin protein levels                                    | <i>GCKR</i>                                                        | C                | 0.61   | C                 | 0.445   | .08         | -                                                      | 3E-9    | 11663                       |
| rs780093        | 27,596,107  | 1.00  | rs780093                         | 27,596,107   | 23362303 | Palmitoleic acid (16:1n-7) plasma levels                      | <i>GCKR, C2orf16, ZNF512, XAB1</i>                                 | C                | 0.61   | T                 | 0.41    | .02         | -                                                      | 1E-9    | 0                           |
| rs780093        | 27,596,107  | 0.97  | rs780094                         | 27,594,741   | 21829377 | Phospholipid levels (plasma)                                  | <i>GCKR</i>                                                        | C                | 0.61   | T                 | NR      | .02         | -                                                      | 9E-9    | 1366                        |
| rs780093        | 27,596,107  | 0.90  | rs1260326                        | 27,584,444   | 22139419 | Platelet counts                                               | <i>GCKR</i>                                                        | C                | 0.61   | T                 | NR      | 2.33        | -                                                      | 9E-10   | 11663                       |
| rs780093        | 27,596,107  | 0.90  | rs1260326                        | 27,584,444   | 23022100 | Serum albumin level                                           | <i>GCKR-FNDC4</i>                                                  | C                | 0.61   | T                 | 0.41    | .01         | -                                                      | 4E-19   | 11663                       |

| Leptin SNP (LS) | LS position | $r^2$ | Previously identified SNPs (PIS) | PIS position | PMID     | Disease/trait                               | Previously reported gene(s) | LS effect allele | LS EAF | PIS effect allele | PIS EAF | OR/ $\beta$ | Direction of effect for leptin-increasing allele (+/-) | P value | Distance between LS and PIS |
|-----------------|-------------|-------|----------------------------------|--------------|----------|---------------------------------------------|-----------------------------|------------------|--------|-------------------|---------|-------------|--------------------------------------------------------|---------|-----------------------------|
| rs780093        | 27,596,107  | 1.00  | rs780093                         | 27,596,107   | 22829776 | Sex hormone-binding globulin levels         | <i>GCKR</i>                 | C                | 0.61   | T                 | 0.40    | .03         | -                                                      | 2E-16   | 0                           |
| rs780093        | 27,596,107  | 1.00  | rs780093                         | 27,596,107   | 22829776 | Sex hormone-binding globulin levels         | <i>GCKR</i>                 | C                | 0.61   | T                 | 0.40    | .04         | -                                                      | 9E-11   | 0                           |
| rs780093        | 27,596,107  | 0.74  | rs4665972                        | 27,451,601   | 23726366 | Triglycerides                               | <i>GCKR</i>                 | C                | 0.61   | T                 | 0.123   | .07         | -                                                      | 1E-8    | 144506                      |
| rs780093        | 27,596,107  | 0.90  | rs1260326                        | 27,584,444   | 24097068 | Triglycerides                               | <i>GCKR</i>                 | C                | 0.61   | T                 | 0.39    | .12         | -                                                      | 2E-239  | 11663                       |
| rs780093        | 27,596,107  | 0.90  | rs1260326                        | 27,584,444   | 20686565 | Triglycerides                               | <i>GCKR</i>                 | C                | 0.61   | T                 | 0.41    | 8.76        | -                                                      | 6E-133  | 11663                       |
| rs780093        | 27,596,107  | 0.90  | rs1260326                        | 27,584,444   | 20139978 | Triglycerides                               | <i>GCKR</i>                 | C                | 0.61   | C                 | 0.45    | .10         | -                                                      | 1E-11   | 11663                       |
| rs780093        | 27,596,107  | 0.90  | rs1260326                        | 27,584,444   | 19060906 | Triglycerides                               | <i>GCKR</i>                 | C                | 0.61   | T                 | 0.45    | .12         | -                                                      | 2E-31   | 11663                       |
| rs780093        | 27,596,107  | 0.97  | rs780094                         | 27,594,741   | 23726366 | Triglycerides                               | <i>GCKR</i>                 | C                | 0.61   | C                 | 0.358   | .07         | -                                                      | 7E-9    | 1366                        |
| rs780093        | 27,596,107  | 0.97  | rs780094                         | 27,594,741   | 19060911 | Triglycerides                               | <i>GCKR</i>                 | C                | 0.61   | G                 | 0.63    | .10         | +                                                      | 3E-20   | 1366                        |
| rs780093        | 27,596,107  | 0.97  | rs780094                         | 27,594,741   | 18193044 | Triglycerides                               | <i>GCKR</i>                 | C                | 0.61   | T                 | 0.34    | .13         | -                                                      | 3E-14   | 1366                        |
| rs780093        | 27,596,107  | 0.97  | rs780094                         | 27,594,741   | 18193043 | Triglycerides                               | <i>GCKR</i>                 | C                | 0.61   | T                 | 0.39    | 8.59        | -                                                      | 6E-32   | 1366                        |
| rs780093        | 27,596,107  | 0.90  | rs1260333                        | 27,602,108   | 20864672 | Triglycerides                               | <i>GCKR</i>                 | C                | 0.61   | C                 | 0.55    | .05         | +                                                      | 2E-19   | 6001                        |
| rs780093        | 27,596,107  | 1.00  | rs780093                         | 27,596,107   | 21386085 | Triglycerides-Blood Pressure (TG-BP)        | <i>GCKR</i>                 | C                | 0.61   | A                 | NR      | .18         | -                                                      | 3E-10   | 0                           |
| rs780093        | 27,596,107  | 0.90  | rs1260326                        | 27,584,444   | 20081857 | Two-hour glucose challenge                  | <i>GCKR</i>                 | C                | 0.61   | T                 | NR      | .07         | -                                                      | 3E-10   | 11663                       |
| rs780093        | 27,596,107  | 0.90  | rs1260326                        | 27,584,444   | 23263486 | Urate levels                                | <i>GCKR</i>                 | C                | 0.61   | T                 | 0.41    | .07         | -                                                      | 1E-44   | 11663                       |
| rs780093        | 27,596,107  | 1.00  | rs780093                         | 27,596,107   | 20884846 | Urate levels                                | <i>GCKR</i>                 | C                | 0.61   | T                 | 0.40    | 5.15        | -                                                      | 4E-17   | 0                           |
| rs780093        | 27,596,107  | 0.97  | rs780094                         | 27,594,741   | 19503597 | Uric acid levels                            | <i>GCKR</i>                 | C                | 0.61   | T                 | 0.42    | .05         | -                                                      | 1E-9    | 1366                        |
| rs780093        | 27,596,107  | 1.00  | rs780093                         | 27,596,107   | 21386085 | Waist Circumference - Triglycerides (WC-TG) | <i>GCKR</i>                 | C                | 0.61   | A                 | NR      | .19         | -                                                      | 2E-12   | 0                           |
| rs780093        | 27,596,107  | 0.90  | rs1260326                        | 27,584,444   | 18454146 | Waist circumference and related phenotypes  | <i>GCKR</i>                 | C                | 0.61   | NR                | NR      | NR          | N/A                                                    | 4E-8    | 11663                       |

**Supplementary Table 12.** Genes prioritized by DEPICT for loci that reached  $P < 1 \times 10^{-5}$  with leptin in the BMI-unadjusted meta-analysis.

| SNP        | Chr | Region start | Region end | No. genes in locus | Gene symbol     | Gene P value | False discovery rate |
|------------|-----|--------------|------------|--------------------|-----------------|--------------|----------------------|
| rs6738627  | 2   | 165510134    | 165700189  | 1                  | <i>COBLL1</i>   | 0.012        | 0.95                 |
| rs900400   | 3   | 156799456    | 156840793  | 2                  | -               | 0.012        | 0.48                 |
| rs4722501  | 7   | 25632971     | 25790614   | 1                  | -               | 0.085        | 1                    |
| rs11646653 | 16  | 28477983     | 29002104   | 15                 | <i>RABEP2</i>   | 0.103        | 1                    |
| rs717339   | 2   | 165752696    | 165812035  | 1                  | <i>SLC38A11</i> | 0.138        | 1                    |
| rs10487505 | 7   | 127881337    | 127897681  | 1                  | <i>LEP</i>      | 0.153        | 1                    |
| rs780093   | 2   | 27505260     | 27858041   | 14                 | <i>GCKR</i>     | 0.156        | 1                    |
| rs11646653 | 16  | 28477983     | 29002104   | 15                 | <i>SULT1A2</i>  | 0.168        | 1                    |
| rs900400   | 3   | 156799456    | 156840793  | 2                  | -               | 0.184        | 1                    |
| rs11646653 | 16  | 28477983     | 29002104   | 15                 | <i>NUPR1</i>    | 0.264        | 1                    |
| rs11646653 | 16  | 28477983     | 29002104   | 15                 | <i>ATP2A1</i>   | 0.277        | 1                    |
| rs6071166  | 20  | 37353105     | 37358015   | 1                  | <i>SLC32A1</i>  | 0.34         | 1                    |
| rs7593751  | 2   | 228474806    | 228498036  | 1                  | <i>C2orf83</i>  | 0.371        | 1                    |
| rs11646653 | 16  | 28477983     | 29002104   | 15                 | <i>SH2B1</i>    | 0.389        | 1                    |
| rs780093   | 2   | 27505260     | 27858041   | 14                 | <i>C2orf16</i>  | 0.423        | 1                    |
| rs780093   | 2   | 27505260     | 27858041   | 14                 | <i>TRIM54</i>   | 0.446        | 1                    |
| rs11646653 | 16  | 28477983     | 29002104   | 15                 | <i>ATXN2L</i>   | 0.502        | 1                    |
| rs6444289  | 3   | 187871072    | 188608460  | 1                  | <i>LPP</i>      | 0.513        | 1                    |
| rs11646653 | 16  | 28477983     | 29002104   | 15                 | <i>CLN3</i>     | 0.518        | 1                    |
| rs11646653 | 16  | 28477983     | 29002104   | 15                 | <i>APOBR</i>    | 0.539        | 1                    |
| rs780093   | 2   | 27505260     | 27858041   | 14                 | <i>NRBP1</i>    | 0.541        | 1                    |
| rs11646653 | 16  | 28477983     | 29002104   | 15                 | <i>LAT</i>      | 0.555        | 1                    |
| rs11646653 | 16  | 28477983     | 29002104   | 15                 | <i>NFATC2IP</i> | 0.566        | 1                    |
| rs780093   | 2   | 27505260     | 27858041   | 14                 | <i>KRTCAP3</i>  | 0.594        | 1                    |
| rs780093   | 2   | 27505260     | 27858041   | 14                 | <i>ZNF512</i>   | 0.66         | 1                    |
| rs780093   | 2   | 27505260     | 27858041   | 14                 | <i>FNDC4</i>    | 0.674        | 1                    |
| rs11646653 | 16  | 28477983     | 29002104   | 15                 | <i>CD19</i>     | 0.691        | 1                    |
| rs11646653 | 16  | 28477983     | 29002104   | 15                 | <i>IL27</i>     | 0.7          | 1                    |
| rs780093   | 2   | 27505260     | 27858041   | 14                 | <i>SNX17</i>    | 0.733        | 1                    |
| rs780093   | 2   | 27505260     | 27858041   | 14                 | <i>ZNF513</i>   | 0.787        | 1                    |
| rs780093   | 2   | 27505260     | 27858041   | 14                 | <i>IFT172</i>   | 0.798        | 1                    |
| rs9077     | 1   | 202091972    | 202130716  | 3                  | <i>PTPN7</i>    | 0.816        | 1                    |
| rs9077     | 1   | 202091972    | 202130716  | 3                  | <i>ARL8A</i>    | 0.85         | 1                    |
| rs780093   | 2   | 27505260     | 27858041   | 14                 | <i>EIF2B4</i>   | 0.868        | 1                    |
| rs780093   | 2   | 27505260     | 27858041   | 14                 | <i>PPM1G</i>    | 0.884        | 1                    |
| rs11646653 | 16  | 28477983     | 29002104   | 15                 | <i>CCDC101</i>  | 0.895        | 1                    |
| rs11646653 | 16  | 28477983     | 29002104   | 15                 | <i>TUFM</i>     | 0.907        | 1                    |
| rs11646653 | 16  | 28477983     | 29002104   | 15                 | <i>SPNS1</i>    | 0.908        | 1                    |
| rs9077     | 1   | 202091972    | 202130716  | 3                  | <i>GPR37L1</i>  | 0.912        | 1                    |
| rs8043757  | 16  | 53633824     | 53737771   | 1                  | <i>RPGRIP1L</i> | 0.922        | 1                    |
| rs780093   | 2   | 27505260     | 27858041   | 14                 | <i>GTF3C2</i>   | 0.936        | 1                    |
| rs780093   | 2   | 27505260     | 27858041   | 14                 | -               | 0.957        | 1                    |



**Supplementary Table 13.** Genes prioritized by DEPICT for loci that reached  $P < 1 \times 10^{-5}$  with leptin in the BMI-adjusted meta-analysis.

| SNP           | Chr | Region start | Region end | No. genes in |                 | Gene P value | False discovery rate |
|---------------|-----|--------------|------------|--------------|-----------------|--------------|----------------------|
|               |     |              |            | locus        | Gene symbol     |              |                      |
| rs900400      | 3   | 156799456    | 156840793  | 2            | -               | 0.01         | 0.35                 |
| rs780094      | 2   | 27505260     | 27858041   | 14           | <i>KRTCAP3</i>  | 0.075        | 1                    |
| rs2113060     | 5   | 37106330     | 37753537   | 3            | <i>NUP155</i>   | 0.118        | 1                    |
| rs780094      | 2   | 27505260     | 27858041   | 14           | <i>ZNF512</i>   | 0.168        | 1                    |
| rs4842841     | 15  | 84322838     | 85123406   | 3            | -               | 0.176        | 1                    |
| rs780094      | 2   | 27505260     | 27858041   | 14           | <i>IFT172</i>   | 0.199        | 1                    |
| rs11597063    | 10  | 7487520      | 7513904    | 1            | -               | 0.21         | 1                    |
| rs10487505    | 7   | 127881337    | 127897681  | 1            | <i>LEP</i>      | 0.248        | 1                    |
| rs780094      | 2   | 27505260     | 27858041   | 14           | <i>FNDC4</i>    | 0.256        | 1                    |
| rs780094      | 2   | 27505260     | 27858041   | 14           | <i>PPM1G</i>    | 0.291        | 1                    |
| rs780094      | 2   | 27505260     | 27858041   | 14           | <i>GCKR</i>     | 0.309        | 1                    |
| rs2113060     | 5   | 37106330     | 37753537   | 3            | <i>WDR70</i>    | 0.33         | 1                    |
| rs780094      | 2   | 27505260     | 27858041   | 14           | <i>GTF3C2</i>   | 0.516        | 1                    |
| rs6071166     | 20  | 37353105     | 37358015   | 1            | <i>SLC32A1</i>  | 0.516        | 1                    |
| rs2189383     | 5   | 130759614    | 131132756  | 2            | <i>RAPGEF6</i>  | 0.532        | 1                    |
| rs16849413    | 1   | 162039564    | 162353321  | 1            | <i>NOS1AP</i>   | 0.573        | 1                    |
| rs2113060     | 5   | 37106330     | 37753537   | 3            | <i>C5orf42</i>  | 0.604        | 1                    |
| rs780094      | 2   | 27505260     | 27858041   | 14           | <i>EIF2B4</i>   | 0.648        | 1                    |
| rs7739842     | 6   | 131894284    | 132068553  | 3            | <i>MED23</i>    | 0.661        | 1                    |
| rs2189383     | 5   | 130759614    | 131132756  | 2            | <i>FNIP1</i>    | 0.674        | 1                    |
| rs780094      | 2   | 27505260     | 27858041   | 14           | <i>C2orf16</i>  | 0.696        | 1                    |
| rs17526000    | 10  | 96997329     | 97050781   | 1            | <i>PDLIM1</i>   | 0.705        | 1                    |
| rs4842841     | 15  | 84322838     | 85123406   | 3            | -               | 0.719        | 1                    |
| rs6738627     | 2   | 165510134    | 165700189  | 1            | <i>COBLL1</i>   | 0.728        | 1                    |
| rs12443533    | 16  | 18995274     | 19091417   | 2            | <i>TMC7</i>     | 0.743        | 1                    |
| rs900400      | 3   | 156799456    | 156840793  | 2            | -               | 0.748        | 1                    |
| rs12443533    | 16  | 18995274     | 19091417   | 2            | <i>COQ7</i>     | 0.784        | 1                    |
| rs780094      | 2   | 27505260     | 27858041   | 14           | <i>NRBP1</i>    | 0.81         | 1                    |
| rs780094      | 2   | 27505260     | 27858041   | 14           | <i>SNX17</i>    | 0.825        | 1                    |
| rs780094      | 2   | 27505260     | 27858041   | 14           | -               | 0.84         | 1                    |
| rs1304218-rs: | 7   | 49890017     | 50160925   | 1            | <i>ZPBP</i>     | 0.853        | 1                    |
| rs2035794     | 4   | 130645326    | 130692636  | 1            | -               | 0.858        | 1                    |
| rs780094      | 2   | 27505260     | 27858041   | 14           | <i>ZNF513</i>   | 0.868        | 1                    |
| rs9947679     | 18  | 40847859     | 40857615   | 1            | <i>SYT4</i>     | 0.88         | 1                    |
| rs7739842     | 6   | 131894284    | 132068553  | 3            | <i>ARG1</i>     | 0.886        | 1                    |
| rs7739842     | 6   | 131894284    | 132068553  | 3            | <i>ENPP3</i>    | 0.904        | 1                    |
| rs6973074     | 7   | 153584182    | 154685995  | 1            | <i>DPP6</i>     | 0.91         | 1                    |
| rs1838932     | 7   | 130417401    | 130418888  | 1            | <i>KLF14</i>    | 0.928        | 1                    |
| rs780094      | 2   | 27505260     | 27858041   | 14           | <i>TRIM54</i>   | 0.958        | 1                    |
| rs4842841     | 15  | 84322838     | 85123406   | 3            | <i>ADAMTSL3</i> | 0.992        | 1                    |

**Supplementary Table 14.** Tissue enrichment in DEPICT analysis for loci that reached  $P < 1 \times 10^{-5}$  with leptin in the BMI-unadjusted meta-analysis.

| MeSH ID                          | Name                           | MeSH first level term    | MeSH second level term  | P value | FDR |
|----------------------------------|--------------------------------|--------------------------|-------------------------|---------|-----|
| A04.623.603                      | Oropharynx                     | Respiratory System       | Pharynx                 | 0.05    | 1   |
| A15.382.520.604.800              | Palatine Tonsil                | Hemic and Immune Systems | Immune System           | 0.05    | 1   |
| A06.407.071.140                  | Adrenal Cortex                 | Endocrine System         | Endocrine Glands        | 0.08    | 1   |
| A06.407.071                      | Adrenal Glands                 | Endocrine System         | Endocrine Glands        | 0.08    | 1   |
| A11.436.348                      | Hepatocytes                    | Cells                    | Epithelial Cells        | 0.09    | 1   |
| A08.186.211.730.317.357.352.435  | Hypothalamo Hypophyseal System | Nervous System           | Central Nervous System  | 0.09    | 1   |
| A08.713                          | Neurosecretory Systems         | Nervous System           | Neurosecretory Systems  | 0.09    | 1   |
| A08.186.211.730.317.357.352      | Hypothalamus Middle            | Nervous System           | Central Nervous System  | 0.09    | 1   |
| A05.360.319.679.690              | Myometrium                     | Urogenital System        | Genitalia               | 0.10    | 1   |
| A05.360.319.114.630.535          | Ovarian Follicle               | Urogenital System        | Genitalia               | 0.10    | 1   |
| A06.407.312.497.535.300.500      | Cumulus Cells                  | Endocrine System         | Endocrine Glands        | 0.10    | 1   |
| A11.436.329                      | Granulosa Cells                | Cells                    | Epithelial Cells        | 0.10    | 1   |
| A07.541.510.110                  | Aortic Valve                   | Cardiovascular System    | Heart                   | 0.11    | 1   |
| A07.541.510                      | Heart Valves                   | Cardiovascular System    | Heart                   | 0.11    | 1   |
| A10.165.114.830.750              | Subcutaneous Fat               | Tissues                  | Connective Tissue       | 0.11    | 1   |
| A10.165.114.830                  | Adipose Tissue White           | Tissues                  | Connective Tissue       | 0.11    | 1   |
| A10.165.114                      | Adipose Tissue                 | Tissues                  | Connective Tissue       | 0.11    | 1   |
| A10.165.114.830.500              | Abdominal Fat                  | Tissues                  | Connective Tissue       | 0.13    | 1   |
| A10.165.114.830.500.750          | Subcutaneous Fat Abdominal     | Tissues                  | Connective Tissue       | 0.13    | 1   |
| A11.872.378.294                  | Lymphoid Progenitor Cells      | Cells                    | Stem Cells              | 0.13    | 1   |
| A11.118.637.555.567.562.440      | Precursor Cells B Lymphoid     | Cells                    | Blood Cells             | 0.13    | 1   |
| A08.186.211.730.317.357          | Hypothalamus                   | Nervous System           | Central Nervous System  | 0.14    | 1   |
| A11.382                          | Endocrine Cells                | Cells                    | Endocrine Cells         | 0.14    | 1   |
| A08.186.211.730.317              | Diencephalon                   | Nervous System           | Central Nervous System  | 0.16    | 1   |
| A03.556.875.875                  | Stomach                        | Digestive System         | Gastrointestinal Tract  | 0.17    | 1   |
| A03.556.875                      | Upper Gastrointestinal Tract   | Digestive System         | Gastrointestinal Tract  | 0.18    | 1   |
| A03.556.875.500                  | Esophagus                      | Digestive System         | Gastrointestinal Tract  | 0.18    | 1   |
| A03.556.500.760                  | Salivary Gland                 | Digestive System         | Gastrointestinal Tract  | 0.18    | 1   |
| A03.556.500.760.464              | Parotid Gland                  | Digestive System         | Gastrointestinal Tract  | 0.19    | 1   |
| A10.690.467                      | Muscle Smooth                  | Tissues                  | Muscles                 | 0.19    | 1   |
| A07.231.114                      | Arteries                       | Cardiovascular System    | Blood Vessels           | 0.20    | 1   |
| A11.329.114                      | Adipocytes                     | Cells                    | Connective Tissue Cells | 0.20    | 1   |
| A07.231                          | Blood Vessels                  | Cardiovascular System    | Blood Vessels           | 0.21    | 1   |
| A10.336                          | Exocrine Glands                | Tissues                  | Exocrine Glands         | 0.22    | 1   |
| A11.497.497.600                  | Oocytes                        | Cells                    | Germ Cells              | 0.25    | 1   |
| A05.360.490.690                  | Ovum                           | Urogenital System        | Genitalia               | 0.25    | 1   |
| A10.336.707                      | Prostate                       | Tissues                  | Exocrine Glands         | 0.25    | 1   |
| A02.165                          | Cartilage                      | Musculoskeletal System   | Cartilage               | 0.27    | 1   |
| A05.810.453.324                  | Kidney Cortex                  | Urogenital System        | Urinary Tract           | 0.27    | 1   |
| A03.734                          | Pancreas                       | Digestive System         | Pancreas                | 0.28    | 1   |
| A07.231.908                      | Veins                          | Cardiovascular System    | Blood Vessels           | 0.29    | 1   |
| A08.186.211.730.885.287.500.571. | Visual Cortex                  | Nervous System           | Central Nervous System  | 0.29    | 1   |
| A05.360.490                      | Germ Cells                     | Urogenital System        | Genitalia               | 0.29    | 1   |
| A03.620                          | Liver                          | Digestive System         | Liver                   | 0.29    | 1   |
| A08.186.211.730.885.287.500.571  | Occipital Lobe                 | Nervous System           | Central Nervous System  | 0.30    | 1   |
| A11.872.653                      | Neural Stem Cells              | Cells                    | Stem Cells              | 0.30    | 1   |
| A05.360.444                      | Genitalia Male                 | Urogenital System        | Genitalia               | 0.30    | 1   |
| A08.186.211.730.885.287.500.270  | Frontal Lobe                   | Nervous System           | Central Nervous System  | 0.31    | 1   |
| A11.436.294.064                  | Glucagon Secreting Cells       | Cells                    | Epithelial Cells        | 0.32    | 1   |
| A11.382.625                      | Enteroendocrine Cells          | Cells                    | Endocrine Cells         | 0.32    | 1   |
| A08.186.211.653                  | Mesencephalon                  | Nervous System           | Central Nervous System  | 0.32    | 1   |
| A11.329.171                      | Chondrocytes                   | Cells                    | Connective Tissue Cells | 0.32    | 1   |

| MeSH ID                         | Name                                | MeSH first level term    | MeSH second level term   | P value | FDR |
|---------------------------------|-------------------------------------|--------------------------|--------------------------|---------|-----|
| A05.360.444.492.362             | Foreskin                            | Urogenital System        | Genitalia                | 0.33    | 1   |
| A05.360.444.492                 | Penis                               | Urogenital System        | Genitalia                | 0.33    | 1   |
| A10.615.284.473                 | Chorion                             | Tissues                  | Membranes                | 0.33    | 1   |
| A10.615.284                     | Extraembryonic Membranes            | Tissues                  | Membranes                | 0.33    | 1   |
| A11.620.520                     | Myocytes Smooth Muscle              | Cells                    | Muscle Cells             | 0.34    | 1   |
| A11.620                         | Muscle Cells                        | Cells                    | Muscle Cells             | 0.34    | 1   |
| A08.186                         | Central Nervous System              | Nervous System           | Central Nervous System   | 0.35    | 1   |
| A08.186.211                     | Brain                               | Nervous System           | Central Nervous System   | 0.35    | 1   |
| A07.541.358.100                 | Atrial Appendage                    | Cardiovascular System    | Heart                    | 0.35    | 1   |
| A08.186.211.730                 | Prosencephalon                      | Nervous System           | Central Nervous System   | 0.36    | 1   |
| A07.541.358                     | Heart Atria                         | Cardiovascular System    | Heart                    | 0.36    | 1   |
| A14.724                         | Pharynx                             | Stomatognathic System    | Pharynx                  | 0.38    | 1   |
| A05.810.453                     | Kidney                              | Urogenital System        | Urinary Tract            | 0.39    | 1   |
| A14.549                         | Mouth                               | Stomatognathic System    | Mouth                    | 0.39    | 1   |
| A03.734.414                     | Islets of Langerhans                | Digestive System         | Pancreas                 | 0.39    | 1   |
| A05.810                         | Urinary Tract                       | Urogenital System        | Urinary Tract            | 0.39    | 1   |
| A08.186.211.730.885.287.500     | Cerebral Cortex                     | Nervous System           | Central Nervous System   | 0.40    | 1   |
| A10.615.550.760                 | Respiratory Mucosa                  | Tissues                  | Membranes                | 0.40    | 1   |
| A09.531                         | Nose                                | Sense Organs             | Nose                     | 0.40    | 1   |
| A04.531.520                     | Nasal Mucosa                        | Respiratory System       | Nose                     | 0.40    | 1   |
| A10.615.550.599                 | Mouth Mucosa                        | Tissues                  | Membranes                | 0.40    | 1   |
| A11.627.624.249                 | Monocyte Macrophage Precursor Cells | Cells                    | Myeloid Cells            | 0.40    | 1   |
| A08.186.211.730.885             | Telencephalon                       | Nervous System           | Central Nervous System   | 0.40    | 1   |
| A11.118.637.555.567.562         | B Lymphocytes                       | Cells                    | Blood Cells              | 0.41    | 1   |
| A11.063                         | Antibody Producing Cells            | Cells                    | Antibody-Producing Cells | 0.41    | 1   |
| A08.186.211.730.885.287         | Cerebrum                            | Nervous System           | Central Nervous System   | 0.41    | 1   |
| A08.186.211.730.885.287.500.863 | Temporal Lobe                       | Nervous System           | Central Nervous System   | 0.42    | 1   |
| A08.186.211.464.710.225         | Entorhinal Cortex                   | Nervous System           | Central Nervous System   | 0.43    | 1   |
| A08.186.211.464.710             | Parahippocampal Gyrus               | Nervous System           | Central Nervous System   | 0.43    | 1   |
| A07.231.908.670                 | Portal System                       | Cardiovascular System    | Blood Vessels            | 0.43    | 1   |
| A07.231.908.670.874             | Umbilical Veins                     | Cardiovascular System    | Blood Vessels            | 0.43    | 1   |
| A05.360                         | Genitalia                           | Urogenital System        | Genitalia                | 0.44    | 1   |
| A11.329.228                     | Fibroblasts                         | Cells                    | Connective Tissue Cells  | 0.44    | 1   |
| A05.360.319.679                 | Uterus                              | Urogenital System        | Genitalia                | 0.45    | 1   |
| A08.186.211.464                 | Limbic System                       | Nervous System           | Central Nervous System   | 0.45    | 1   |
| A02.835.583.443.800.800         | Synovial Fluid                      | Musculoskeletal System   | Skeleton                 | 0.45    | 1   |
| A11.872.190.260                 | Embryoid Bodies                     | Cells                    | Stem Cells               | 0.45    | 1   |
| A03.556.124.684                 | Intestine Small                     | Digestive System         | Gastrointestinal Tract   | 0.48    | 1   |
| A15.145.229.188                 | Blood Platelets                     | Hemic and Immune Systems | Blood                    | 0.48    | 1   |
| A03.556.249.124                 | Ileum                               | Digestive System         | Gastrointestinal Tract   | 0.48    | 1   |
| A07.541                         | Heart                               | Cardiovascular System    | Heart                    | 0.49    | 1   |
| A11.329.629                     | Osteoblasts                         | Cells                    | Connective Tissue Cells  | 0.49    | 1   |
| A08.186.211.730.885.287.500.670 | Parietal Lobe                       | Nervous System           | Central Nervous System   | 0.50    | 1   |
| A03.556.124.526.767             | Rectum                              | Digestive System         | Gastrointestinal Tract   | 0.50    | 1   |
| A17.815                         | Skin                                | Integumentary System     | Skin                     | 0.50    | 1   |
| A15.145.229.637.555.567.569.200 | CD4 Positive T Lymphocytes          | Hemic and Immune Systems | Blood                    | 0.51    | 1   |
| A15.382.520.604.700             | Spleen                              | Hemic and Immune Systems | Immune System            | 0.51    | 1   |
| A11.872.580                     | Mesenchymal Stem Cells              | Cells                    | Stem Cells               | 0.51    | 1   |
| A15.145.846                     | Serum                               | Hemic and Immune Systems | Blood                    | 0.51    | 1   |
| A03.556.249.249.209             | Cecum                               | Digestive System         | Gastrointestinal Tract   | 0.52    | 1   |
| A11.118.637.555.567.569.200.700 | T Lymphocytes Regulatory            | Cells                    | Blood Cells              | 0.53    | 1   |
| A10.549                         | Lymphoid Tissue                     | Tissues                  | Lymphoid Tissue          | 0.53    | 1   |

| MeSH ID                         | Name                                    | MeSH first level term    | MeSH second level term  | P value | FDR |
|---------------------------------|-----------------------------------------|--------------------------|-------------------------|---------|-----|
| A15.382.520                     | Lymphatic System                        | Hemic and Immune Systems | Immune System           | 0.53    | 1   |
| A08.186.211.464.405             | Hippocampus                             | Nervous System           | Central Nervous System  | 0.53    | 1   |
| A08.186.211.730.885.287.249     | Basal Ganglia                           | Nervous System           | Central Nervous System  | 0.54    | 1   |
| A11.329.830                     | Stromal Cells                           | Cells                    | Connective Tissue Cells | 0.54    | 1   |
| A15.382.490.555.567             | Lymphocytes                             | Hemic and Immune Systems | Immune System           | 0.54    | 1   |
| A10.272                         | Epithelium                              | Tissues                  | Epithelium              | 0.54    | 1   |
| A07.541.560                     | Heart Ventricles                        | Cardiovascular System    | Heart                   | 0.54    | 1   |
| A10.615.789                     | Serous Membrane                         | Tissues                  | Membranes               | 0.55    | 1   |
| A05.360.319.114.373             | Fallopian Tubes                         | Urogenital System        | Genitalia               | 0.56    | 1   |
| A15.382.490.555.567.622         | Lymphocytes Null                        | Hemic and Immune Systems | Immune System           | 0.57    | 1   |
| A05.360.319                     | Genitalia Female                        | Urogenital System        | Genitalia               | 0.57    | 1   |
| A11.436                         | Epithelial Cells                        | Cells                    | Epithelial Cells        | 0.57    | 1   |
| A10.615.550                     | Mucous Membrane                         | Tissues                  | Membranes               | 0.57    | 1   |
| A10.615                         | Membranes                               | Tissues                  | Membranes               | 0.58    | 1   |
| A03.556                         | Gastrointestinal Tract                  | Digestive System         | Gastrointestinal Tract  | 0.58    | 1   |
| A03.556.249                     | Lower Gastrointestinal Tract            | Digestive System         | Gastrointestinal Tract  | 0.59    | 1   |
| A03.556.249.249                 | Intestine Large                         | Digestive System         | Gastrointestinal Tract  | 0.60    | 1   |
| A02.835.583.443.800             | Synovial Membrane                       | Musculoskeletal System   | Skeleton                | 0.60    | 1   |
| A02.835.583                     | Joints                                  | Musculoskeletal System   | Skeleton                | 0.60    | 1   |
| A02.835.583.443                 | Joint Capsule                           | Musculoskeletal System   | Skeleton                | 0.60    | 1   |
| A08.186.211.730.885.287.249.487 | Corpus Striatum                         | Nervous System           | Central Nervous System  | 0.60    | 1   |
| A03.556.249.249.356             | Colon                                   | Digestive System         | Gastrointestinal Tract  | 0.61    | 1   |
| A08.186.211.132                 | Brain Stem                              | Nervous System           | Central Nervous System  | 0.61    | 1   |
| A11.872.378.590.635             | Granulocyte Macrophage Progenitor Cells | Cells                    | Stem Cells              | 0.61    | 1   |
| A15.145.693                     | Plasma                                  | Hemic and Immune Systems | Blood                   | 0.61    | 1   |
| A05.360.319.679.490             | Endometrium                             | Urogenital System        | Genitalia               | 0.62    | 1   |
| A15.145.229.637.555.567.562.725 | Plasma Cells                            | Hemic and Immune Systems | Blood                   | 0.62    | 1   |
| A14.549.885                     | Tongue                                  | Stomatognathic System    | Mouth                   | 0.62    | 1   |
| A03.556.249.249.356.668         | Colon Sigmoid                           | Digestive System         | Gastrointestinal Tract  | 0.62    | 1   |
| A03.556.124                     | Intestines                              | Digestive System         | Gastrointestinal Tract  | 0.62    | 1   |
| A11.329                         | Connective Tissue Cells                 | Cells                    | Connective Tissue Cells | 0.63    | 1   |
| A15.145.229.637.555             | Leukocytes Mononuclear                  | Hemic and Immune Systems | Blood                   | 0.63    | 1   |
| A10.165.450.300                 | Cicatrix                                | Tissues                  | Connective Tissue       | 0.64    | 1   |
| A10.165.450                     | Granulation Tissue                      | Tissues                  | Connective Tissue       | 0.64    | 1   |
| A15.382.490.315.583             | Neutrophils                             | Hemic and Immune Systems | Immune System           | 0.64    | 1   |
| A06.407                         | Endocrine Glands                        | Endocrine System         | Endocrine Glands        | 0.65    | 1   |
| A05.360.319.114                 | Adnexa Uteri                            | Urogenital System        | Genitalia               | 0.65    | 1   |
| A05.360.319.114.630             | Ovary                                   | Urogenital System        | Genitalia               | 0.65    | 1   |
| A04.411                         | Lung                                    | Respiratory System       | Lung                    | 0.66    | 1   |
| A03.556.124.369                 | Intestinal Mucosa                       | Digestive System         | Gastrointestinal Tract  | 0.66    | 1   |
| A11.118.637                     | Leukocytes                              | Cells                    | Blood Cells             | 0.66    | 1   |
| A10.549.400                     | Lymph Nodes                             | Tissues                  | Lymphoid Tissue         | 0.67    | 1   |
| A11.118.637.555.567.569         | T Lymphocytes                           | Cells                    | Blood Cells             | 0.67    | 1   |
| A08.186.211.865                 | Rhombencephalon                         | Nervous System           | Central Nervous System  | 0.67    | 1   |
| A08.186.211.865.428             | Metencephalon                           | Nervous System           | Central Nervous System  | 0.67    | 1   |
| A15.145                         | Blood                                   | Hemic and Immune Systems | Blood                   | 0.67    | 1   |
| A11.118.637.415                 | Granulocytes                            | Cells                    | Blood Cells             | 0.68    | 1   |
| A10.165.450.300.425             | Keloid                                  | Tissues                  | Connective Tissue       | 0.68    | 1   |
| A11.436.275                     | Endothelial Cells                       | Cells                    | Epithelial Cells        | 0.69    | 1   |
| A06.407.312                     | Gonads                                  | Endocrine System         | Endocrine Glands        | 0.69    | 1   |
| A15.145.229                     | Blood Cells                             | Hemic and Immune Systems | Blood                   | 0.70    | 1   |

| MeSH ID                     | Name                                     | MeSH first level term    | MeSH second level term   | P value | FDR |
|-----------------------------|------------------------------------------|--------------------------|--------------------------|---------|-----|
| A15.382.812.260             | Dendritic Cells                          | Hemic and Immune Systems | Immune System            | 0.70    | 1   |
| A11.066                     | Antigen Presenting Cells                 | Cells                    | Antigen-Presenting Cells | 0.70    | 1   |
| A15.145.300                 | Fetal Blood                              | Hemic and Immune Systems | Blood                    | 0.71    | 1   |
| A11.872.378                 | Hematopoietic Stem Cells                 | Cells                    | Stem Cells               | 0.71    | 1   |
| A14.724.557                 | Nasopharynx                              | Stomatognathic System    | Pharynx                  | 0.72    | 1   |
| A11.436.397                 | Keratinocytes                            | Cells                    | Epithelial Cells         | 0.73    | 1   |
| A15.382                     | Immune System                            | Hemic and Immune Systems | Immune System            | 0.73    | 1   |
| A10.165                     | Connective Tissue                        | Tissues                  | Connective Tissue        | 0.73    | 1   |
| A15.382.216                 | Bone Marrow                              | Hemic and Immune Systems | Immune System            | 0.73    | 1   |
| A02.835.232.834             | Spine                                    | Musculoskeletal System   | Skeleton                 | 0.73    | 1   |
| A15.378.316.580             | Monocytes                                | Hemic and Immune Systems | Hematopoietic System     | 0.73    | 1   |
| A02.835.232.834.151         | Cervical Vertebrae                       | Musculoskeletal System   | Skeleton                 | 0.73    | 1   |
| A08.186.211.132.810.428.200 | Cerebellum                               | Nervous System           | Central Nervous System   | 0.73    | 1   |
| A15.382.680                 | Phagocytes                               | Hemic and Immune Systems | Immune System            | 0.74    | 1   |
| A09.371.729                 | Retina                                   | Sense Organs             | Eye                      | 0.75    | 1   |
| A15.378                     | Hematopoietic System                     | Hemic and Immune Systems | Hematopoietic System     | 0.75    | 1   |
| A15.378.316                 | Bone Marrow Cells                        | Hemic and Immune Systems | Hematopoietic System     | 0.75    | 1   |
| A15.382.490.555.567.537     | Killer Cells Natural                     | Hemic and Immune Systems | Immune System            | 0.76    | 1   |
| A15.382.812.522             | Macrophages                              | Hemic and Immune Systems | Immune System            | 0.76    | 1   |
| A05.810.890                 | Urinary Bladder                          | Urogenital System        | Urinary Tract            | 0.76    | 1   |
| A11.872.378.590.817         | Megakaryocyte Erythroid Progenitor Cells | Cells                    | Stem Cells               | 0.76    | 1   |
| A15.378.316.378.590.837.250 | Erythroid Precursor Cells                | Hemic and Immune Systems | Hematopoietic System     | 0.76    | 1   |
| A15.382.812                 | Mononuclear Phagocyte System             | Hemic and Immune Systems | Immune System            | 0.77    | 1   |
| A11.627.635                 | Myeloid Progenitor Cells                 | Cells                    | Myeloid Cells            | 0.77    | 1   |
| A02.835.232                 | Bone and Bones                           | Musculoskeletal System   | Skeleton                 | 0.77    | 1   |
| A11.627                     | Myeloid Cells                            | Cells                    | Myeloid Cells            | 0.78    | 1   |
| A02.835                     | Skeleton                                 | Musculoskeletal System   | Skeleton                 | 0.78    | 1   |
| A05.360.319.679.256         | Cervix Uteri                             | Urogenital System        | Genitalia                | 0.79    | 1   |
| A10.690                     | Muscles                                  | Tissues                  | Muscles                  | 0.79    | 1   |
| A14.549.167                 | Dentition                                | Stomatognathic System    | Mouth                    | 0.79    | 1   |
| A11.872                     | Stem Cells                               | Cells                    | Stem Cells               | 0.80    | 1   |
| A15.145.229.334             | Erythrocytes                             | Hemic and Immune Systems | Blood                    | 0.80    | 1   |
| A05.360.319.887             | Vulva                                    | Urogenital System        | Genitalia                | 0.81    | 1   |
| A11.443                     | Erythroid Cells                          | Cells                    | Erythroid Cells          | 0.81    | 1   |
| A11.329.372.600             | Macrophages Alveolar                     | Cells                    | Connective Tissue Cells  | 0.83    | 1   |
| A10.272.497                 | Epidermis                                | Tissues                  | Epithelium               | 0.86    | 1   |
| A11.627.340.360             | Granulocyte Precursor Cells              | Cells                    | Myeloid Cells            | 0.87    | 1   |
| A02.835.232.043.300         | Foot Bones                               | Musculoskeletal System   | Skeleton                 | 0.88    | 1   |
| A02.835.232.043.300.710     | Tarsal Bones                             | Musculoskeletal System   | Skeleton                 | 0.88    | 1   |
| A09.371.060                 | Anterior Eye Segment                     | Sense Organs             | Eye                      | 0.88    | 1   |
| A14.549.167.646             | Periodontium                             | Stomatognathic System    | Mouth                    | 0.88    | 1   |
| A09.371.337.168             | Conjunctiva                              | Sense Organs             | Eye                      | 0.89    | 1   |
| A09.371.337                 | Eyelids                                  | Sense Organs             | Eye                      | 0.89    | 1   |
| A11.872.700                 | Pluripotent Stem Cells                   | Cells                    | Stem Cells               | 0.89    | 1   |
| A11.872.700.500             | Induced Pluripotent Stem Cells           | Cells                    | Stem Cells               | 0.89    | 1   |
| A02.835.232.043             | Bones of Lower Extremity                 | Musculoskeletal System   | Skeleton                 | 0.89    | 1   |
| A11.872.190                 | Embryonic Stem Cells                     | Cells                    | Stem Cells               | 0.90    | 1   |
| A10.690.552.500             | Muscle Skeletal                          | Tissues                  | Muscles                  | 0.91    | 1   |
| A10.690.552                 | Muscle Striated                          | Tissues                  | Muscles                  | 0.91    | 1   |
| A02.633.567.850             | Quadriceps Muscle                        | Musculoskeletal System   | Muscles                  | 0.93    | 1   |
| A06.407.312.782             | Testis                                   | Endocrine System         | Endocrine Glands         | 0.95    | 1   |
| A06.407.900                 | Thyroid Gland                            | Endocrine System         | Endocrine Glands         | 0.99    | 1   |
| A11.872.040                 | Adult Stem Cells                         | Cells                    | Stem Cells               | 0.99    | 1   |
| A09.371                     | Eye                                      | Sense Organs             | Eye                      | 1.00    | 1   |

**Supplementary Table 15.** Tissue enrichment in DEPICT analysis for loci that reached  $P < 1 \times 10^{-5}$  with leptin in the BMI-adjusted meta-analysis.

| MeSH ID                         | Name                                     | MeSH first level term    | MeSH second level term   | P value | FDR |
|---------------------------------|------------------------------------------|--------------------------|--------------------------|---------|-----|
| A11.436.348                     | Hepatocytes                              | Cells                    | Epithelial Cells         | 0.0140  | 1   |
| A08.713                         | Neurosecretory Systems                   | Nervous System           | Neurosecretory Systems   | 0.0400  | 1   |
| A08.186.211.730.317.357.352     | Hypothalamus Middle                      | Nervous System           | Central Nervous System   | 0.0400  | 1   |
| A08.186.211.730.317.357.352.435 | Hypothalamo Hypophyseal System           | Nervous System           | Central Nervous System   | 0.0400  | 1   |
| A11.118.637.555.567.562.440     | Precursor Cells B Lymphoid               | Cells                    | Blood Cells              | 0.0429  | 1   |
| A11.872.378.294                 | Lymphoid Progenitor Cells                | Cells                    | Stem Cells               | 0.0429  | 1   |
| A11.382.625                     | Enteroendocrine Cells                    | Cells                    | Endocrine Cells          | 0.0857  | 1   |
| A11.436.294.064                 | Glucagon Secreting Cells                 | Cells                    | Epithelial Cells         | 0.0857  | 1   |
| A08.186.211.730.317.357         | Hypothalamus                             | Nervous System           | Central Nervous System   | 0.0932  | 1   |
| A10.165                         | Connective Tissue                        | Tissues                  | Connective Tissue        | 0.10    | 1   |
| A10.165.114.830.500.750         | Subcutaneous Fat Abdominal               | Tissues                  | Connective Tissue        | 0.10    | 1   |
| A10.165.114.830.500             | Abdominal Fat                            | Tissues                  | Connective Tissue        | 0.10    | 1   |
| A11.436.397                     | Keratinocytes                            | Cells                    | Epithelial Cells         | 0.11    | 1   |
| A10.165.114.830                 | Adipose Tissue White                     | Tissues                  | Connective Tissue        | 0.11    | 1   |
| A10.165.114.830.750             | Subcutaneous Fat                         | Tissues                  | Connective Tissue        | 0.11    | 1   |
| A15.382.216                     | Bone Marrow                              | Hemic and Immune Systems | Immune System            | 0.11    | 1   |
| A11.118.637.555.567.562         | B Lymphocytes                            | Cells                    | Blood Cells              | 0.12    | 1   |
| A11.063                         | Antibody Producing Cells                 | Cells                    | Antibody-Producing Cells | 0.12    | 1   |
| A10.165.114                     | Adipose Tissue                           | Tissues                  | Connective Tissue        | 0.12    | 1   |
| A02.835.232                     | Bone and Bones                           | Musculoskeletal System   | Skeleton                 | 0.12    | 1   |
| A02.835                         | Skeleton                                 | Musculoskeletal System   | Skeleton                 | 0.13    | 1   |
| A14.724                         | Pharynx                                  | Stomatognathic System    | Pharynx                  | 0.13    | 1   |
| A08.186.211.730.317             | Diencephalon                             | Nervous System           | Central Nervous System   | 0.14    | 1   |
| A03.734.414                     | Islets of Langerhans                     | Digestive System         | Pancreas                 | 0.15    | 1   |
| A15.145.693                     | Plasma                                   | Hemic and Immune Systems | Blood                    | 0.16    | 1   |
| A15.145.229.637.555.567.562.725 | Plasma Cells                             | Hemic and Immune Systems | Blood                    | 0.16    | 1   |
| A15.145.846                     | Serum                                    | Hemic and Immune Systems | Blood                    | 0.17    | 1   |
| A11.329.114                     | Adipocytes                               | Cells                    | Connective Tissue Cells  | 0.17    | 1   |
| A06.407.071                     | Adrenal Glands                           | Endocrine System         | Endocrine Glands         | 0.20    | 1   |
| A10.615.284                     | Extraembryonic Membranes                 | Tissues                  | Membranes                | 0.22    | 1   |
| A10.615.284.473                 | Chorion                                  | Tissues                  | Membranes                | 0.22    | 1   |
| A05.360.490                     | Germ Cells                               | Urogenital System        | Genitalia                | 0.22    | 1   |
| A04.623.603                     | Oropharynx                               | Respiratory System       | Pharynx                  | 0.23    | 1   |
| A15.382.520.604.800             | Palatine Tonsil                          | Hemic and Immune Systems | Immune System            | 0.23    | 1   |
| A11.872.653                     | Neural Stem Cells                        | Cells                    | Stem Cells               | 0.23    | 1   |
| A15.382                         | Immune System                            | Hemic and Immune Systems | Immune System            | 0.24    | 1   |
| A05.360.319.679.690             | Myometrium                               | Urogenital System        | Genitalia                | 0.25    | 1   |
| A15.382.490.315.583             | Neutrophils                              | Hemic and Immune Systems | Immune System            | 0.25    | 1   |
| A15.382.490.555.567             | Lymphocytes                              | Hemic and Immune Systems | Immune System            | 0.26    | 1   |
| A11.118.637.415                 | Granulocytes                             | Cells                    | Blood Cells              | 0.26    | 1   |
| A11.872.378.590.817             | Megakaryocyte Erythroid Progenitor Cells | Cells                    | Stem Cells               | 0.26    | 1   |
| A15.378.316.378.590.837.250     | Erythroid Precursor Cells                | Hemic and Immune Systems | Hematopoietic System     | 0.26    | 1   |
| A07.231.908                     | Veins                                    | Cardiovascular System    | Blood Vessels            | 0.26    | 1   |
| A14.724.557                     | Nasopharynx                              | Stomatognathic System    | Pharynx                  | 0.27    | 1   |
| A08.186.211.865.428             | Metencephalon                            | Nervous System           | Central Nervous System   | 0.27    | 1   |
| A08.186.211.865                 | Rhombencephalon                          | Nervous System           | Central Nervous System   | 0.27    | 1   |
| A02.633.567.850                 | Quadriceps Muscle                        | Musculoskeletal System   | Muscles                  | 0.27    | 1   |
| A11.329.171                     | Chondrocytes                             | Cells                    | Connective Tissue Cells  | 0.28    | 1   |
| A08.186.211.132.810.428.200     | Cerebellum                               | Nervous System           | Central Nervous System   | 0.28    | 1   |
| A06.407.071.140                 | Adrenal Cortex                           | Endocrine System         | Endocrine Glands         | 0.29    | 1   |
| A03.620                         | Liver                                    | Digestive System         | Liver                    | 0.29    | 1   |

| MeSH ID                         | Name                       | MeSH first level term    | MeSH second level term  | P value | FDR |
|---------------------------------|----------------------------|--------------------------|-------------------------|---------|-----|
| A08.186.211.132                 | Brain Stem                 | Nervous System           | Central Nervous System  | 0.29    | 1   |
| A10.690.552.500                 | Muscle Skeletal            | Tissues                  | Muscles                 | 0.29    | 1   |
| A10.690.552                     | Muscle Striated            | Tissues                  | Muscles                 | 0.29    | 1   |
| A10.272.497                     | Epidermis                  | Tissues                  | Epithelium              | 0.30    | 1   |
| A07.231.908.670                 | Portal System              | Cardiovascular System    | Blood Vessels           | 0.31    | 1   |
| A07.231.908.670.874             | Umbilical Veins            | Cardiovascular System    | Blood Vessels           | 0.31    | 1   |
| A11.436.275                     | Endothelial Cells          | Cells                    | Epithelial Cells        | 0.31    | 1   |
| A10.690                         | Muscles                    | Tissues                  | Muscles                 | 0.31    | 1   |
| A11.382                         | Endocrine Cells            | Cells                    | Endocrine Cells         | 0.32    | 1   |
| A14.549.885                     | Tongue                     | Stomatognathic System    | Mouth                   | 0.34    | 1   |
| A05.360.490.690                 | Ovum                       | Urogenital System        | Genitalia               | 0.35    | 1   |
| A11.497.497.600                 | Oocytes                    | Cells                    | Germ Cells              | 0.35    | 1   |
| A10.615.550.599                 | Mouth Mucosa               | Tissues                  | Membranes               | 0.35    | 1   |
| A11.118.637                     | Leukocytes                 | Cells                    | Blood Cells             | 0.36    | 1   |
| A10.272                         | Epithelium                 | Tissues                  | Epithelium              | 0.36    | 1   |
| A08.186.211.653                 | Mesencephalon              | Nervous System           | Central Nervous System  | 0.38    | 1   |
| A02.835.583.443.800.800         | Synovial Fluid             | Musculoskeletal System   | Skeleton                | 0.39    | 1   |
| A05.810.453.324                 | Kidney Cortex              | Urogenital System        | Urinary Tract           | 0.39    | 1   |
| A11.329.629                     | Osteoblasts                | Cells                    | Connective Tissue Cells | 0.40    | 1   |
| A03.556.249.249.209             | Cecum                      | Digestive System         | Gastrointestinal Tract  | 0.40    | 1   |
| A07.231                         | Blood Vessels              | Cardiovascular System    | Blood Vessels           | 0.40    | 1   |
| A09.531                         | Nose                       | Sense Organs             | Nose                    | 0.40    | 1   |
| A10.615.550.760                 | Respiratory Mucosa         | Tissues                  | Membranes               | 0.40    | 1   |
| A04.531.520                     | Nasal Mucosa               | Respiratory System       | Nose                    | 0.40    | 1   |
| A15.382.490.555.567.622         | Lymphocytes Null           | Hemic and Immune Systems | Immune System           | 0.40    | 1   |
| A15.145.300                     | Fetal Blood                | Hemic and Immune Systems | Blood                   | 0.40    | 1   |
| A09.371.729                     | Retina                     | Sense Organs             | Eye                     | 0.41    | 1   |
| A03.556.875.500                 | Esophagus                  | Digestive System         | Gastrointestinal Tract  | 0.41    | 1   |
| A10.690.467                     | Muscle Smooth              | Tissues                  | Muscles                 | 0.41    | 1   |
| A11.436                         | Epithelial Cells           | Cells                    | Epithelial Cells        | 0.42    | 1   |
| A14.549                         | Mouth                      | Stomatognathic System    | Mouth                   | 0.43    | 1   |
| A11.118.637.555.567.569.200.700 | T Lymphocytes Regulatory   | Cells                    | Blood Cells             | 0.44    | 1   |
| A05.360.444.492.362             | Foreskin                   | Urogenital System        | Genitalia               | 0.44    | 1   |
| A05.360.444.492                 | Penis                      | Urogenital System        | Genitalia               | 0.44    | 1   |
| A15.145.229.637.555.567.569.200 | CD4 Positive T Lymphocytes | Hemic and Immune Systems | Blood                   | 0.45    | 1   |
| A05.360.319.679.256             | Cervix Uteri               | Urogenital System        | Genitalia               | 0.46    | 1   |
| A03.556.124.526.767             | Rectum                     | Digestive System         | Gastrointestinal Tract  | 0.47    | 1   |
| A11.620                         | Muscle Cells               | Cells                    | Muscle Cells            | 0.47    | 1   |
| A11.620.520                     | Myocytes Smooth Muscle     | Cells                    | Muscle Cells            | 0.47    | 1   |
| A15.145.229.637.555             | Leukocytes Mononuclear     | Hemic and Immune Systems | Blood                   | 0.48    | 1   |
| A11.872.190.260                 | Embryoid Bodies            | Cells                    | Stem Cells              | 0.48    | 1   |
| A17.815                         | Skin                       | Integumentary System     | Skin                    | 0.49    | 1   |
| A03.734                         | Pancreas                   | Digestive System         | Pancreas                | 0.51    | 1   |
| A15.145                         | Blood                      | Hemic and Immune Systems | Blood                   | 0.51    | 1   |
| A15.145.229                     | Blood Cells                | Hemic and Immune Systems | Blood                   | 0.52    | 1   |
| A08.186.211.464.405             | Hippocampus                | Nervous System           | Central Nervous System  | 0.52    | 1   |
| A10.615.550                     | Mucous Membrane            | Tissues                  | Membranes               | 0.52    | 1   |
| A11.443                         | Erythroid Cells            | Cells                    | Erythroid Cells         | 0.52    | 1   |
| A03.556.249.249                 | Intestine Large            | Digestive System         | Gastrointestinal Tract  | 0.53    | 1   |
| A15.378                         | Hematopoietic System       | Hemic and Immune Systems | Hematopoietic System    | 0.53    | 1   |
| A15.378.316                     | Bone Marrow Cells          | Hemic and Immune Systems | Hematopoietic System    | 0.53    | 1   |
| A07.541.560                     | Heart Ventricles           | Cardiovascular System    | Heart                   | 0.53    | 1   |

| MeSH ID                           | Name                         | MeSH first level term    | MeSH second level term  | P value | FDR |
|-----------------------------------|------------------------------|--------------------------|-------------------------|---------|-----|
| A15.145.229.334                   | Erythrocytes                 | Hemic and Immune Systems | Blood                   | 0.53    | 1   |
| A05.360.319.679                   | Uterus                       | Urogenital System        | Genitalia               | 0.53    | 1   |
| A03.556.875                       | Upper Gastrointestinal Tract | Digestive System         | Gastrointestinal Tract  | 0.53    | 1   |
| A08.186.211.730                   | Prosencephalon               | Nervous System           | Central Nervous System  | 0.54    | 1   |
| A03.556.249.249.356               | Colon                        | Digestive System         | Gastrointestinal Tract  | 0.54    | 1   |
| A08.186                           | Central Nervous System       | Nervous System           | Central Nervous System  | 0.54    | 1   |
| A08.186.211.730.885.287.500.270   | Frontal Lobe                 | Nervous System           | Central Nervous System  | 0.54    | 1   |
| A08.186.211.730.885.287.500.571   | Occipital Lobe               | Nervous System           | Central Nervous System  | 0.54    | 1   |
| A08.186.211                       | Brain                        | Nervous System           | Central Nervous System  | 0.54    | 1   |
| A03.556.249                       | Lower Gastrointestinal Tract | Digestive System         | Gastrointestinal Tract  | 0.54    | 1   |
| A07.541.358.100                   | Atrial Appendage             | Cardiovascular System    | Heart                   | 0.54    | 1   |
| A06.407.312.782                   | Testis                       | Endocrine System         | Endocrine Glands        | 0.55    | 1   |
| A08.186.211.730.885.287.500.571.7 | Visual Cortex                | Nervous System           | Central Nervous System  | 0.56    | 1   |
| A05.360.319.679.490               | Endometrium                  | Urogenital System        | Genitalia               | 0.56    | 1   |
| A03.556.124                       | Intestines                   | Digestive System         | Gastrointestinal Tract  | 0.56    | 1   |
| A03.556                           | Gastrointestinal Tract       | Digestive System         | Gastrointestinal Tract  | 0.57    | 1   |
| A10.615                           | Membranes                    | Tissues                  | Membranes               | 0.57    | 1   |
| A10.165.450.300.425               | Keloid                       | Tissues                  | Connective Tissue       | 0.58    | 1   |
| A08.186.211.464                   | Limbic System                | Nervous System           | Central Nervous System  | 0.58    | 1   |
| A07.541.358                       | Heart Atria                  | Cardiovascular System    | Heart                   | 0.58    | 1   |
| A08.186.211.730.885.287.500       | Cerebral Cortex              | Nervous System           | Central Nervous System  | 0.58    | 1   |
| A03.556.249.249.356.668           | Colon Sigmoid                | Digestive System         | Gastrointestinal Tract  | 0.58    | 1   |
| A08.186.211.730.885               | Telencephalon                | Nervous System           | Central Nervous System  | 0.59    | 1   |
| A08.186.211.730.885.287           | Cerebrum                     | Nervous System           | Central Nervous System  | 0.59    | 1   |
| A03.556.124.684                   | Intestine Small              | Digestive System         | Gastrointestinal Tract  | 0.59    | 1   |
| A07.541                           | Heart                        | Cardiovascular System    | Heart                   | 0.59    | 1   |
| A10.615.789                       | Serous Membrane              | Tissues                  | Membranes               | 0.60    | 1   |
| A05.810.453                       | Kidney                       | Urogenital System        | Urinary Tract           | 0.60    | 1   |
| A05.810                           | Urinary Tract                | Urogenital System        | Urinary Tract           | 0.60    | 1   |
| A05.810.890                       | Urinary Bladder              | Urogenital System        | Urinary Tract           | 0.61    | 1   |
| A03.556.875.875                   | Stomach                      | Digestive System         | Gastrointestinal Tract  | 0.61    | 1   |
| A05.360.444                       | Genitalia Male               | Urogenital System        | Genitalia               | 0.61    | 1   |
| A02.835.232.043.300               | Foot Bones                   | Musculoskeletal System   | Skeleton                | 0.62    | 1   |
| A02.835.232.043.300.710           | Tarsal Bones                 | Musculoskeletal System   | Skeleton                | 0.62    | 1   |
| A08.186.211.730.885.287.500.863   | Temporal Lobe                | Nervous System           | Central Nervous System  | 0.62    | 1   |
| A02.835.583.443                   | Joint Capsule                | Musculoskeletal System   | Skeleton                | 0.63    | 1   |
| A02.835.583.443.800               | Synovial Membrane            | Musculoskeletal System   | Skeleton                | 0.63    | 1   |
| A02.835.583                       | Joints                       | Musculoskeletal System   | Skeleton                | 0.63    | 1   |
| A07.231.114                       | Arteries                     | Cardiovascular System    | Blood Vessels           | 0.63    | 1   |
| A02.835.232.043                   | Bones of Lower Extremity     | Musculoskeletal System   | Skeleton                | 0.63    | 1   |
| A11.329.228                       | Fibroblasts                  | Cells                    | Connective Tissue Cells | 0.63    | 1   |
| A10.336.707                       | Prostate                     | Tissues                  | Exocrine Glands         | 0.63    | 1   |
| A08.186.211.730.885.287.249       | Basal Ganglia                | Nervous System           | Central Nervous System  | 0.63    | 1   |
| A10.165.450                       | Granulation Tissue           | Tissues                  | Connective Tissue       | 0.64    | 1   |
| A10.165.450.300                   | Cicatrix                     | Tissues                  | Connective Tissue       | 0.64    | 1   |
| A11.627                           | Myeloid Cells                | Cells                    | Myeloid Cells           | 0.64    | 1   |
| A08.186.211.464.710               | Parahippocampal Gyrus        | Nervous System           | Central Nervous System  | 0.65    | 1   |
| A08.186.211.464.710.225           | Entorhinal Cortex            | Nervous System           | Central Nervous System  | 0.65    | 1   |
| A15.382.680                       | Phagocytes                   | Hemic and Immune Systems | Immune System           | 0.65    | 1   |
| A03.556.124.369                   | Intestinal Mucosa            | Digestive System         | Gastrointestinal Tract  | 0.65    | 1   |
| A10.336                           | Exocrine Glands              | Tissues                  | Exocrine Glands         | 0.66    | 1   |



| MeSH ID                         | Name                                    | MeSH first level term    | MeSH second level term   | P value | FDR |
|---------------------------------|-----------------------------------------|--------------------------|--------------------------|---------|-----|
| A11.627.340.360                 | Granulocyte Precursor Cells             | Cells                    | Myeloid Cells            | 0.66    | 1   |
| A15.382.520                     | Lymphatic System                        | Hemic and Immune Systems | Immune System            | 0.66    | 1   |
| A10.549                         | Lymphoid Tissue                         | Tissues                  | Lymphoid Tissue          | 0.66    | 1   |
| A11.118.637.555.567.569         | T Lymphocytes                           | Cells                    | Blood Cells              | 0.68    | 1   |
| A15.382.520.604.700             | Spleen                                  | Hemic and Immune Systems | Immune System            | 0.68    | 1   |
| A09.371.337.168                 | Conjunctiva                             | Sense Organs             | Eye                      | 0.69    | 1   |
| A09.371.337                     | Eyelids                                 | Sense Organs             | Eye                      | 0.69    | 1   |
| A09.371.060                     | Anterior Eye Segment                    | Sense Organs             | Eye                      | 0.69    | 1   |
| A08.186.211.730.885.287.500.670 | Parietal Lobe                           | Nervous System           | Central Nervous System   | 0.69    | 1   |
| A08.186.211.730.885.287.249.487 | Corpus Striatum                         | Nervous System           | Central Nervous System   | 0.69    | 1   |
| A05.360.319.114.630.535         | Ovarian Follicle                        | Urogenital System        | Genitalia                | 0.70    | 1   |
| A11.436.329                     | Granulosa Cells                         | Cells                    | Epithelial Cells         | 0.70    | 1   |
| A06.407.312.497.535.300.500     | Cumulus Cells                           | Endocrine System         | Endocrine Glands         | 0.70    | 1   |
| A15.382.490.555.567.537         | Killer Cells Natural                    | Hemic and Immune Systems | Immune System            | 0.71    | 1   |
| A04.411                         | Lung                                    | Respiratory System       | Lung                     | 0.72    | 1   |
| A14.549.167.646                 | Periodontium                            | Stomatognathic System    | Mouth                    | 0.72    | 1   |
| A05.360                         | Genitalia                               | Urogenital System        | Genitalia                | 0.72    | 1   |
| A11.329.372.600                 | Macrophages Alveolar                    | Cells                    | Connective Tissue Cells  | 0.73    | 1   |
| A11.872.190                     | Embryonic Stem Cells                    | Cells                    | Stem Cells               | 0.74    | 1   |
| A06.407.900                     | Thyroid Gland                           | Endocrine System         | Endocrine Glands         | 0.74    | 1   |
| A05.360.319.887                 | Vulva                                   | Urogenital System        | Genitalia                | 0.74    | 1   |
| A06.407                         | Endocrine Glands                        | Endocrine System         | Endocrine Glands         | 0.74    | 1   |
| A10.549.400                     | Lymph Nodes                             | Tissues                  | Lymphoid Tissue          | 0.77    | 1   |
| A11.872.700                     | Pluripotent Stem Cells                  | Cells                    | Stem Cells               | 0.77    | 1   |
| A11.872.700.500                 | Induced Pluripotent Stem Cells          | Cells                    | Stem Cells               | 0.77    | 1   |
| A11.872.378                     | Hematopoietic Stem Cells                | Cells                    | Stem Cells               | 0.77    | 1   |
| A07.541.510.110                 | Aortic Valve                            | Cardiovascular System    | Heart                    | 0.77    | 1   |
| A07.541.510                     | Heart Valves                            | Cardiovascular System    | Heart                    | 0.77    | 1   |
| A05.360.319                     | Genitalia Female                        | Urogenital System        | Genitalia                | 0.77    | 1   |
| A06.407.312                     | Gonads                                  | Endocrine System         | Endocrine Glands         | 0.79    | 1   |
| A02.835.232.834.151             | Cervical Vertebrae                      | Musculoskeletal System   | Skeleton                 | 0.79    | 1   |
| A11.872                         | Stem Cells                              | Cells                    | Stem Cells               | 0.79    | 1   |
| A11.872.580                     | Mesenchymal Stem Cells                  | Cells                    | Stem Cells               | 0.79    | 1   |
| A02.835.232.834                 | Spine                                   | Musculoskeletal System   | Skeleton                 | 0.79    | 1   |
| A15.378.316.580                 | Monocytes                               | Hemic and Immune Systems | Hematopoietic System     | 0.82    | 1   |
| A15.145.229.188                 | Blood Platelets                         | Hemic and Immune Systems | Blood                    | 0.83    | 1   |
| A11.329                         | Connective Tissue Cells                 | Cells                    | Connective Tissue Cells  | 0.83    | 1   |
| A05.360.319.114.630             | Ovary                                   | Urogenital System        | Genitalia                | 0.86    | 1   |
| A05.360.319.114                 | Adnexa Uteri                            | Urogenital System        | Genitalia                | 0.86    | 1   |
| A11.627.635                     | Myeloid Progenitor Cells                | Cells                    | Myeloid Cells            | 0.86    | 1   |
| A14.549.167                     | Dentition                               | Stomatognathic System    | Mouth                    | 0.86    | 1   |
| A02.165                         | Cartilage                               | Musculoskeletal System   | Cartilage                | 0.87    | 1   |
| A03.556.249.124                 | Ileum                                   | Digestive System         | Gastrointestinal Tract   | 0.87    | 1   |
| A05.360.319.114.373             | Fallopian Tubes                         | Urogenital System        | Genitalia                | 0.89    | 1   |
| A15.382.812                     | Mononuclear Phagocyte System            | Hemic and Immune Systems | Immune System            | 0.89    | 1   |
| A15.382.812.522                 | Macrophages                             | Hemic and Immune Systems | Immune System            | 0.91    | 1   |
| A03.556.500.760                 | Salivary Glands                         | Digestive System         | Gastrointestinal Tract   | 0.91    | 1   |
| A11.872.040                     | Adult Stem Cells                        | Cells                    | Stem Cells               | 0.91    | 1   |
| A09.371                         | Eye                                     | Sense Organs             | Eye                      | 0.91    | 1   |
| A11.329.830                     | Stromal Cells                           | Cells                    | Connective Tissue Cells  | 0.93    | 1   |
| A03.556.500.760.464             | Parotid Gland                           | Digestive System         | Gastrointestinal Tract   | 0.93    | 1   |
| A11.872.378.590.635             | Granulocyte Macrophage Progenitor Cells | Cells                    | Stem Cells               | 0.94    | 1   |
| A11.066                         | Antigen Presenting Cells                | Cells                    | Antigen-Presenting Cells | 0.95    | 1   |
| A15.382.812.260                 | Dendritic Cells                         | Hemic and Immune Systems | Immune System            | 0.95    | 1   |
| A11.627.624.249                 | Monocyte Macrophage Precursor Cells     | Cells                    | Myeloid Cells            | 0.96    | 1   |

**Supplementary Table 16.** DEPICT with re-constituted gene network for BMI-unadjusted leptin.

| Reconstituted gene set ID | Reconstituted gene set name         | P value  | FDR | Reconstituted gene set genes in associated loci                                                                                                         |
|---------------------------|-------------------------------------|----------|-----|---------------------------------------------------------------------------------------------------------------------------------------------------------|
| MP:0004939                | Abnormal B Cell Morphology          | 3.51E-05 | 1   | CD19 (13.01), RABEP2 (3.19), LAT (3.14), SNX17 (2.65), NRBP1 (2.03), LPP (1.85)                                                                         |
| ENSG00000133627           | ACTR3B protein complex              | 1.25E-04 | 1   | PPM1G (6.28), ATP2A1 (6.04), SNX17 (3.93), GTF3C2 (3.88), ZNF513 (3.21), ZNF512 (2.99), PTPN7 (2.51), TRIM54 (2.45), LPP (2.18), ARL8A (1.72)           |
| ENSG00000087008           | ACOX3 protein complex               | 1.91E-04 | 1   | ATP2A1 (2.4), NFATC2IP (2.19), TRIM54 (1.97), LPP (1.81), FNDC4 (1.74), LEP (1.71), KRTCAP3 (1.68)                                                      |
| GO:0043087                | Regulation Of Gtpase Activity       | 2.88E-04 | 1   | APOBR (2.45), SNX17 (2.15), ZNF513 (1.89)                                                                                                               |
| ENSG00000077380           | DYNC112 protein complex             | 4.25E-04 | 1   | SNX17 (2.77), NRBP1 (2.29), ENSG00000241544 (1.94), EIF2B4 (1.76)                                                                                       |
| ENSG00000165309           | ARMC3 protein complex               | 4.37E-04 | 1   | NRBP1 (2.63), ARL8A (2.51), GCKR (2.49), LPP (1.71)                                                                                                     |
| GO:0005096                | Gtpase Activator Activity           | 4.59E-04 | 1   | APOBR (6.03), PTPN7 (3.91), LAT (2.64), GPR37L1 (2.6), RABEP2 (2.37), ATXN2L (1.71), NRBP1 (1.7)                                                        |
| ENSG00000174177           | CTU2 protein complex                | 4.65E-04 | 1   | LAT (3.7), GCKR (3.33), PTPN7 (2.74), ZNF512 (2.63), APOBR (2.28), CLN3 (2.22), FNDC4 (2.17), LEP (2.11), TUFM (2.0), SH2B1 (1.95)                      |
| ENSG00000124214           | STAU1 protein complex               | 4.88E-04 | 1   | ATP2A1 (5.06), PPM1G (4.2), NRBP1 (3.67), GTF3C2 (2.93), RABEP2 (1.75)                                                                                  |
| GO:0042054                | Histone Methyltransferase Activity  | 6.54E-04 | 1   | ATXN2L (4.31), PPM1G (3.6), GTF3C2 (2.87), NFATC2IP (2.79), EIF2B4 (2.62), SH2B1 (2.61), CCDC101 (2.13), NRBP1 (1.99), SNX17 (1.96)                     |
| GO:0019902                | Phosphatase Binding                 | 6.90E-04 | 1   | TRIM54 (3.29), NRBP1 (2.4), SH2B1 (1.98), PPM1G (1.89), CD19 (1.65)                                                                                     |
| ENSG00000105610           | KLF1 protein complex                | 6.97E-04 | 1   | ATXN2L (7.53), ARL8A (3.83), RABEP2 (3.23), PPM1G (2.82), TUFM (2.45), CCDC101 (2.29), ZNF512 (2.15), SH2B1 (1.85)                                      |
| MP:0002774                | Small Prostate Gland                | 8.19E-04 | 1   | FNDC4 (4.52), GCKR (2.5), SNX17 (2.32), EIF2B4 (1.89), C2orf83 (1.68)                                                                                   |
| GO:0033124                | Regulation Of Gtp Catabolic Process | 9.16E-04 | 1   | APOBR (2.39), SNX17 (2.28), ZNF513 (1.8)                                                                                                                |
| ENSG00000072518           | MARK2 protein complex               | 9.55E-04 | 1   | PTPN7 (3.32), PPM1G (2.67), ATXN2L (2.54), ENSG00000243629 (2.53), APOBR (2.35), ARL8A (2.3), COBLL1 (2.21), SH2B1 (2.19), NRBP1 (2.15), SLC32A1 (1.95) |

| Reconstituted gene set ID | Reconstituted gene set name            | P value | FDR | Reconstituted gene set genes in associated loci                                                                                         |
|---------------------------|----------------------------------------|---------|-----|-----------------------------------------------------------------------------------------------------------------------------------------|
| MP:0001282                | Short Vibrissae                        | 0.001   | 1   | GPR37L1 (3.11), EIF2B4 (2.28), CCDC101 (2.1), ENSG00000223561 (1.88), C2orf83 (1.7)                                                     |
| GO:0007015                | Actin Filament Organization            | 0.001   | 1   | LPP (3.66), SLC38A11 (2.08), PTPN7 (1.99), APOBR (1.91), NRBP1 (1.66)                                                                   |
| ENSG00000100813           | ACIN1 protein complex                  | 0.001   | 1   | CCDC101 (1.91), NFATC2IP (1.76)                                                                                                         |
| GO:0043149                | Stress Fiber Assembly                  | 0.001   | 1   | SLC38A11 (2.97), CLN3 (1.75)                                                                                                            |
| ENSG00000133216           | EPHB2 protein complex                  | 0.001   | 1   | NRBP1 (2.8), ATXN2L (2.6), PPM1G (2.56), LPP (1.72), IFT172 (1.7)                                                                       |
| ENSG00000112038           | OPRM1 protein complex                  | 0.001   | 1   | SLC32A1 (5.44), C2orf83 (2.46), ARL8A (2.42), LEP (2.33), LPP (2.09), SNX17 (1.86), NRBP1 (1.86), ENSG00000243629 (1.75), ATXN2L (1.69) |
| MP:0005065                | Abnormal Neutrophil Morphology         | 0.001   | 1   | PTPN7 (5.03), APOBR (3.63), LAT (2.46), RPGRIP1L (1.68), LEP (1.65)                                                                     |
| ENSG00000163017           | ACTG2 protein complex                  | 0.001   | 1   | PPM1G (5.21), LPP (4.46), NRBP1 (2.82), SNX17 (2.45), TUFM (2.37), ARL8A (1.87)                                                         |
| MP:0001764                | Abnormal Homeostasis                   | 0.002   | 1   | SULT1A2 (4.91), LEP (3.08), GCKR (1.98), C2orf83 (1.87), ENSG00000243629 (1.84)                                                         |
| MP:0003419                | Delayed Endochondral Bone Ossification | 0.002   | 1   | NUPR1 (3.07), LEP (2.32), SLC32A1 (1.95), LPP (1.65)                                                                                    |
| ENSG00000198211           | TUBB3 protein complex                  | 0.002   | 1   | NRBP1 (4.37), PPM1G (4.16), SNX17 (2.95), LPP (2.83), ENSG00000243629 (2.16), ZNF512 (2.1)                                              |
| ENSG00000157193           | LRP8 protein complex                   | 0.002   | 1   | GPR37L1 (3.85), NRBP1 (3.16), EIF2B4 (3.13)                                                                                             |
| ENSG00000114670           | NEK11 protein complex                  | 0.002   | 1   | ATP2A1 (2.14), FNDC4 (2.06), NFATC2IP (2.06), LPP (1.83)                                                                                |
| ENSG00000139219           | COL2A1 protein complex                 | 0.002   | 1   | NUPR1 (2.05), LAT (1.76), SLC38A11 (1.73)                                                                                               |
| ENSG00000058272           | PPP1R12A protein complex               | 0.002   | 1   | ATP2A1 (5.92), TRIM54 (4.72), PPM1G (4.02), NRBP1 (3.79), LPP (3.57), SNX17 (3.02), EIF2B4 (1.83)                                       |
| ENSG00000149177           | PTPRJ protein complex                  | 0.002   | 1   | CLN3 (4.43), LAT (4.28), ARL8A (2.17), IFT172 (2.16), TUFM (2.13), APOBR (2.05), CCDC101 (1.84), ATXN2L (1.78)                          |

| Reconstituted gene set ID                    | Reconstituted gene set name                                   | P value | FDR | Reconstituted gene set genes in associated loci                                                                                            |
|----------------------------------------------|---------------------------------------------------------------|---------|-----|--------------------------------------------------------------------------------------------------------------------------------------------|
| ENSG00000103342                              | GSPT1 protein complex                                         | 0.002   | 1   | TUFM (2.45), PPM1G (2.36), NRBP1 (2.25), ZNF512 (1.83), CD19 (1.72)                                                                        |
| ENSG00000151577                              | DRD3 protein complex                                          | 0.002   | 1   | LPP (2.6), LEP (2.59), COBLL1 (1.77), LAT (1.76), NRBP1 (1.75)                                                                             |
| GO:0015085                                   | Calcium Ion Transmembrane Transporter Activity                | 0.002   | 1   | TRIM54 (3.31), LPP (2.53), SPNS1 (2.17), ENSG00000223561 (1.93), ATXN2L (1.84), LEP (1.79)                                                 |
| ENSG00000125753                              | VASP protein complex                                          | 0.002   | 1   | APOBR (6.07), ATP2A1 (4.63), ATXN2L (4.51), LPP (4.37), LAT (3.83), PTPN7 (3.24), TRIM54 (2.7), PPM1G (2.51), CCDC101 (2.39), ARL8A (1.81) |
| MP:0004989                                   | Decreased Osteoblast Cell Number                              | 0.002   | 1   | LEP (3.46), KRTCAP3 (2.81), SLC32A1 (2.32), ENSG00000241544 (1.92)                                                                         |
| MP:0002896                                   | Abnormal Bone Mineralization                                  | 0.002   | 1   | NUPR1 (5.46), LPP (1.78)                                                                                                                   |
| ENSG00000047849                              | MAP4 protein complex                                          | 0.002   | 1   | NRBP1 (3.66), ARL8A (2.95), PPM1G (2.75), CLN3 (2.48), APOBR (2.32), LAT (2.28), SULT1A2 (2.21)                                            |
| ENSG00000100612                              | DHRS7 protein complex                                         | 0.002   | 1   | NRBP1 (4.53), SNX17 (3.89), ATXN2L (3.66), GTF3C2 (3.29), TUFM (2.8), PPM1G (2.41), ARL8A (1.83), SH2B1 (1.78), RABEP2 (1.69)              |
| ENSG00000158560                              | DYNC111 protein complex                                       | 0.003   | 1   | ATP2A1 (6.96), ARL8A (3.48), NRBP1 (2.6), ATXN2L (1.95), RABEP2 (1.74)                                                                     |
| GO:0051017                                   | Actin Filament Bundle Assembly                                | 0.003   | 1   | SLC38A11 (3.44), LPP (2.3), APOBR (2.14), ZNF512 (1.73)                                                                                    |
| MP:0005617                                   | Increased Susceptibility To Type Iv Hypersensitivity Reaction | 0.003   | 1   | LAT (3.3), PTPN7 (2.37), LEP (2.37), C2orf83 (2.13), C2orf16 (1.75), APOBR (1.65)                                                          |
| REACTOME_TRANS-GOLGI_NETWORK_VESICLE_BUDDING | Trans:Golgi Network Vesicle Budding                           | 0.003   | 1   | CLN3 (5.06), NRBP1 (4.0), SPNS1 (2.95), SNX17 (2.6)                                                                                        |
| REACTOME_CLATHRIN_DERIVED_VESICLE_BUDDING    | Clathrin Derived Vesicle Budding                              | 0.003   | 1   | CLN3 (5.06), NRBP1 (4.0), SPNS1 (2.95), SNX17 (2.6)                                                                                        |
| ENSG00000156795                              | WDYHV1 protein complex                                        | 0.003   | 1   | CCDC101 (3.8), NUPR1 (3.18), NFATC2IP (2.89), KRTCAP3 (2.56), SULT1A2 (2.41), ZNF512 (1.92)                                                |
| ENSG00000116353                              | MECR protein complex                                          | 0.003   | 1   | ATXN2L (3.03), SULT1A2 (2.55), GCKR (2.22), RPGRIP1L (1.7)                                                                                 |
| GO:0008170                                   | N-Methyltransferase Activity                                  | 0.003   | 1   | ATXN2L (3.53), GTF3C2 (3.3), EIF2B4 (3.16), CCDC101 (2.82), PPM1G (2.45), TUFM (2.25), SH2B1 (2.23), NFATC2IP (2.03)                       |
| ENSG00000169710                              | FASN protein complex                                          | 0.003   | 1   | NRBP1 (3.69), ATP2A1 (2.72), SULT1A2 (2.01), LPP (1.96), ENSG00000243629 (1.92), ARL8A (1.78)                                              |
| MP:0003795                                   | Abnormal Bone Structure                                       | 0.003   | 1   | NUPR1 (4.78), LPP (1.78), ENSG00000241544 (1.77)                                                                                           |
| GO:0030811                                   | Regulation Of Nucleotide Catabolic Process                    | 0.003   | 1   | SNX17 (2.21), APOBR (2.0)                                                                                                                  |

**Supplementary Table 17.** DEPICT with re-constituted gene network for BMI-adjusted leptin.

| Reconstituted gene set ID | Reconstituted gene set name            | P value  | FDR    | Reconstituted gene set genes in associated loci                                                                  |
|---------------------------|----------------------------------------|----------|--------|------------------------------------------------------------------------------------------------------------------|
| ENSG00000146963           | LUC7L2 protein complex                 | 1.71E-07 | 0.0500 | NRBP1 (2.77), SLC32A1 (2.36), SYT4 (2.36), TMC7 (2.25), COQ7 (2.14), WDR70 (1.89), PPM1G (1.84), PDLIM1 (1.74)   |
| ENSG00000096063           | SRPK1 protein complex                  | 1.54E-05 | 0.4750 | PPM1G (5.36), COQ7 (3.91), WDR70 (3.05), NUP155 (3.0), ZNF512 (2.31), NRBP1 (2.2)                                |
| MP:0010954                | Abnormal Cellular Respiration          | 3.26E-05 | 0.4670 | TRIM54 (4.88), ZNF513 (2.76), COQ7 (2.33), ZNF512 (1.93)                                                         |
| ENSG00000149557           | FEZ1 protein complex                   | 3.10E-04 | 1      | COQ7 (3.31), PPM1G (2.73), ENSG00000259511 (2.44), NUP155 (1.86)                                                 |
| ENSG00000173534           | ENSG00000173534 protein complex        | 4.55E-04 | 1      | PPM1G (2.45), COQ7 (2.25), EIF2B4 (2.03), ZNF512 (2.02)                                                          |
| ENSG00000170847           | ENSG00000170847 protein complex        | 4.55E-04 | 1      | PPM1G (2.45), COQ7 (2.25), EIF2B4 (2.03), ZNF512 (2.02)                                                          |
| ENSG00000164708           | PGAM2 protein complex                  | 4.77E-04 | 1      | PPM1G (3.31), TRIM54 (3.29), EIF2B4 (2.64), WDR70 (2.52), IFT172 (2.05), NRBP1 (1.97), SNX17 (1.69)              |
| ENSG00000135698           | MPHOSPH6 protein complex               | 5.21E-04 | 1      | WDR70 (4.98), PPM1G (2.43), SNX17 (2.23), COQ7 (2.0), COBLL1 (1.91), NUP155 (1.82)                               |
| MP:0001721                | Absent Visceral Yolk Sac Blood Islands | 5.27E-04 | 1      | IFT172 (3.23), ADAMTSL3 (3.08), NRBP1 (2.36), GCKR (2.12), NUP155 (1.96), ARG1 (1.94)                            |
| ENSG00000024422           | EHD2 protein complex                   | 5.79E-04 | 1      | SNX17 (4.7), NRBP1 (3.92), ZNF512 (3.43), PDLIM1 (2.98), PPM1G (2.85), ENPP3 (2.27), WDR70 (2.0), IFT172 (1.66)  |
| ENSG00000079739           | PGM1 protein complex                   | 6.19E-04 | 1      | WDR70 (4.33), SYT4 (2.58), EIF2B4 (2.49), SNX17 (2.2), IFT172 (1.71)                                             |
| ENSG00000136286           | MYO1G protein complex                  | 6.19E-04 | 1      | COBLL1 (2.79), SNX17 (1.7)                                                                                       |
| ENSG00000072958           | AP1M1 protein complex                  | 6.30E-04 | 1      | ZNF512 (3.12), PPM1G (2.3), NUP155 (2.26), NOS1AP (1.85), FNIP1 (1.83), SNX17 (1.83), GTF3C2 (1.8), NRBP1 (1.69) |
| ENSG00000112742           | TTK protein complex                    | 7.82E-04 | 1      | DPP6 (1.85), MED23 (1.74)                                                                                        |
| ENSG00000107625           | DDX50 protein complex                  | 8.23E-04 | 1      | PPM1G (3.27), MED23 (2.96), RAPGEF6 (2.81), NUP155 (2.71), ARG1 (2.52), GTF3C2 (2.04)                            |

| Reconstituted gene set ID | Reconstituted gene set name        | P value  | FDR | Reconstituted gene set genes in associated loci                                                                                                          |
|---------------------------|------------------------------------|----------|-----|----------------------------------------------------------------------------------------------------------------------------------------------------------|
| ENSG00000138107           | ACTR1A protein complex             | 9.61E-04 | 1   | GTF3C2 (2.95), NRBP1 (2.94), PPM1G (2.85), SNX17 (2.72), IFT172 (2.34), ENSG00000259511 (2.14), NUP155 (2.0), SLC32A1 (1.82), ADAMTSL3 (1.7)             |
| ENSG00000113068           | PFDN1 protein complex              | 0.001    | 1   | GTF3C2 (3.01), PPM1G (2.37), TRIM54 (2.06), ZNF512 (1.99), SLC32A1 (1.9)                                                                                 |
| MP:0000938                | Motor Neuron Degeneration          | 0.001    | 1   | IFT172 (2.96), EIF2B4 (2.84), DPP6 (2.77), GTF3C2 (2.62), NRBP1 (2.32), NUP155 (2.3), ENSG00000259511 (2.14), ZNF513 (2.13), TRIM54 (2.03), PPM1G (1.87) |
| ENSG00000196961           | AP2A1 protein complex              | 0.001    | 1   | MED23 (2.39), NRBP1 (2.35), ZNF512 (1.82)                                                                                                                |
| GO:0046329                | Negative Regulation Of Jnk Cascade | 0.001    | 1   | SNX17 (2.14)                                                                                                                                             |
| ENSG00000007047           | MARK4 protein complex              | 0.001    | 1   | TRIM54 (4.38), PPM1G (4.1), SYT4 (3.38), RAPGEF6 (2.16), NRBP1 (1.81)                                                                                    |
| ENSG00000029363           | BCLAF1 protein complex             | 0.001    | 1   | PPM1G (2.66), PDLIM1 (2.66), WDR70 (2.64), NRBP1 (2.61), SNX17 (2.03), NUP155 (1.89), RAPGEF6 (1.67), ZNF512 (1.67)                                      |
| ENSG00000149182           | ARFGAP2 protein complex            | 0.001    | 1   | NRBP1 (5.63), GTF3C2 (3.13), SNX17 (3.04), MED23 (3.02), FNIP1 (2.78)                                                                                    |
| ENSG00000095139           | ARCN1 protein complex              | 0.001    | 1   | NRBP1 (3.52), COQ7 (3.16), SNX17 (2.76), GTF3C2 (2.71), MED23 (2.66), IFT172 (2.27), EIF2B4 (1.86), WDR70 (1.8)                                          |
| ENSG00000001497           | LAS1L protein complex              | 0.001    | 1   | GTF3C2 (3.58), WDR70 (2.71), KLF14 (2.23), C5orf42 (2.12), PPM1G (2.11), NRBP1 (1.85)                                                                    |
| ENSG00000082805           | ERC1 protein complex               | 0.002    | 1   | SYT4 (3.04), KLF14 (2.86), ADAMTSL3 (2.38), RAPGEF6 (1.75)                                                                                               |
| ENSG00000167881           | SRP68 protein complex              | 0.002    | 1   | NRBP1 (3.94), COQ7 (3.21), IFT172 (2.31), PPM1G (2.17), WDR70 (2.11), ENSG00000232591 (1.86), COBL1 (1.84), FNIP1 (1.75), ENPP3 (1.73), EIF2B4 (1.66)    |
| ENSG00000111602           | TIMELESS protein complex           | 0.002    | 1   | NUP155 (6.3), PPM1G (4.15), GTF3C2 (1.91)                                                                                                                |
| ENSG00000118705           | RPN2 protein complex               | 0.002    | 1   | PPM1G (6.68), SNX17 (5.31), NUP155 (3.84), NRBP1 (2.95), PDLIM1 (2.69), EIF2B4 (2.5), GTF3C2 (2.28), ZNF512 (2.13), NOS1AP (1.79)                        |
| GO:0019400                | Alditol Metabolic Process          | 0.002    | 1   | ENPP3 (3.57), COQ7 (2.44), LEP (2.39), ZPBP (1.89), GCKR (1.66)                                                                                          |
| GO:0006071                | Glycerol Metabolic Process         | 0.002    | 1   | ENPP3 (3.61), LEP (2.49), COQ7 (2.39), ZPBP (1.98)                                                                                                       |

| Reconstituted gene set ID                                         | Reconstituted gene set name                                | P value | FDR | Reconstituted gene set genes in associated loci                                                                                                         |
|-------------------------------------------------------------------|------------------------------------------------------------|---------|-----|---------------------------------------------------------------------------------------------------------------------------------------------------------|
| GO:0019751                                                        | Polyol Metabolic Process                                   | 0.002   | 1   | ENPP3 (3.04), LEP (2.37), ZPBP (2.21), COQ7 (2.01), ENSG00000243629 (1.82)                                                                              |
| GO:0030835                                                        | Negative Regulation Of Actin Filament<br>Depolymerization  | 0.002   | 1   | ENSG00000232591 (2.92), ENSG00000259728 (2.77), ENSG00000259511 (2.34),<br>ENSG00000243629 (1.87), NRBP1 (1.67), NOS1AP (1.66)                          |
| ENSG00000154710                                                   | RABGEF1 protein complex                                    | 0.002   | 1   | NUP155 (2.1), ENSG00000243629 (1.74), FNIP1 (1.71)                                                                                                      |
| GO:0033605                                                        | Positive Regulation Of Catecholamine Secretion             | 0.002   | 1   | NOS1AP (2.16), KLF14 (2.15), LEP (1.94), SYT4 (1.8), C5orf42 (1.77)                                                                                     |
| ENSG00000089009                                                   | RPL6 protein complex                                       | 0.002   | 1   | WDR70 (2.35), NUP155 (2.34), PPM1G (1.73)                                                                                                               |
| ENSG00000174444                                                   | RPL4 protein complex                                       | 0.002   | 1   | NUP155 (4.78), PPM1G (4.76), EIF2B4 (4.13), WDR70 (4.11), GTF3C2 (2.59), NRBP1<br>(2.17)                                                                |
| ENSG00000170820                                                   | FSHR protein complex                                       | 0.002   | 1   | PPM1G (3.5), ENSG00000243629 (3.08), SNX17 (2.66), EIF2B4 (2.01), ZNF512 (1.82),<br>KLF14 (1.82), NRBP1 (1.72), C5orf42 (1.72), ZPBP (1.7), SYT4 (1.65) |
| ENSG00000197299                                                   | BLM protein complex                                        | 0.002   | 1   | NUP155 (6.71), PPM1G (3.55), ZNF512 (3.41), RAPGEF6 (2.62), COQ7 (2.42), C5orf42<br>(2.24), MED23 (1.95)                                                |
| ENSG00000158560                                                   | DYNC111 protein complex                                    | 0.002   | 1   | PDLM1 (3.17), SYT4 (3.09), NRBP1 (2.6), DPP6 (2.14)                                                                                                     |
| ENSG00000108100                                                   | CCNY protein complex                                       | 0.002   | 1   | MED23 (3.92), NUP155 (3.82), ZNF512 (3.74), COQ7 (2.96), GTF3C2 (2.51), SLC32A1<br>(2.25), PPM1G (2.18), SNX17 (2.16), COBLL1 (2.04), ZPBP (1.75)       |
| ENSG00000067369                                                   | TP53BP1 protein complex                                    | 0.003   | 1   | NUP155 (4.67), COQ7 (2.45), ENSG00000232591 (1.86), WDR70 (1.75)                                                                                        |
| ENSG00000066044                                                   | ELAVL1 protein complex                                     | 0.003   | 1   | NUP155 (3.26), PPM1G (2.88), GTF3C2 (2.41), RAPGEF6 (1.98)                                                                                              |
| ENSG00000125503                                                   | PPP1R12C protein complex                                   | 0.003   | 1   | COBLL1 (3.43), PDLM1 (2.44), SNX17 (2.42), RAPGEF6 (1.7), SYT4 (1.66)                                                                                   |
| REACTOME_RECRUITMENT_OF_NUMA_TO_MITOTIC_CENTROSOMES<br>GO:0000922 | Recruitment Of Numa To Mitotic Centrosomes<br>Spindle Pole | 0.003   | 1   | NUP155 (3.5), GTF3C2 (2.61), MED23 (2.48)<br>NUP155 (4.01), IFT172 (2.31), FNIP1 (2.18), COQ7 (1.75), PPM1G (1.69), COBLL1 (1.68)                       |
| GO:0030834                                                        | Regulation Of Actin Filament Depolymerization              | 0.003   | 1   | ENSG00000232591 (2.81), ENSG00000259728 (2.59), ENSG00000259511 (2.46),<br>NOS1AP (1.88), NRBP1 (1.66)                                                  |
| GO:0002792                                                        | Negative Regulation Of Peptide Secretion                   | 0.003   | 1   | LEP (3.04), KRTCAP3 (2.98), NOS1AP (1.87)                                                                                                               |
| ENSG00000141456                                                   | ENSG00000141456 protein complex                            | 0.003   | 1   | GTF3C2 (4.35), WDR70 (3.58), NRBP1 (3.29), MED23 (2.98), C5orf42 (2.88), NUP155<br>(2.54), RAPGEF6 (2.46), FNIP1 (2.34)                                 |
| ENSG00000133961                                                   | NUMB protein complex                                       | 0.003   | 1   | ADAMTSL3 (3.24), WDR70 (1.77), ENSG00000241544 (1.67)                                                                                                   |

**Supplementary Table 18.** Genes prioritized by GRAIL for loci that reached  $P < 1 \times 10^{-5}$  with leptin in the BMI-unadjusted meta-analysis.

| SNP        | Chr | Start     | Stop      | No. genes in locus | Candidate gene(s)            | GRAIL P-value |
|------------|-----|-----------|-----------|--------------------|------------------------------|---------------|
| rs8043757  | 16  | 52354500  | 52406000  | 1                  | <i>FTO</i>                   | 0.23918461    |
| rs780093   | 2   | 27240853  | 27713853  | 23                 | <i>SLC30A3</i>               | 0.3147925     |
| rs6071166  | 20  | 36735500  | 36793500  | 1                  | <i>SLC32A1</i>               | 0.11950529    |
| rs900400   | 3   | 158024492 | 158586492 | 3                  | <i>CCNL1</i>                 | 0.66275441    |
| rs6738627  | 2   | 165207739 | 165342739 | 1                  | <i>COBLL1</i>                | 0.54121544    |
| rs7593751  | 2   | 228186739 | 228233239 | 1                  | <i>DKFZp547H025</i>          | 1             |
| rs717339   | 2   | 165443239 | 165538239 | 2                  | <i>SLC38A11</i>              | 1             |
| rs6444289  | 3   | 189637992 | 189656992 | 1                  | <i>LPP</i>                   | 1             |
| rs9077     | 1   | 200342466 | 200394966 | 3                  | <i>ARL8A, PTPN7, GPR37L1</i> | 1             |
| rs4722501  | 7   | 25647785  | 25769785  | 0                  |                              | N/A           |
| rs10487505 | 7   | 127576785 | 127695285 | 1                  | <i>LEP</i>                   | 1             |
| rs11646653 | 16  | 28192500  | 28943500  | 22                 | <i>EIF3CL</i>                | 0.64698318    |



**Supplementary Table 19.** Genes prioritized by GRAIL for loci that reached  $P < 1 \times 10^{-5}$  with leptin in the BMI-adjusted meta-analysis.

| SNP        | Chr | Start     | Stop      | No. Genes in locus | Candidate gene(s) | GRAIL P-value |
|------------|-----|-----------|-----------|--------------------|-------------------|---------------|
| rs10487505 | 7   | 127576785 | 127695285 | 1                  | <i>LEP</i>        | 1             |
| rs6071166  | 20  | 36735500  | 36793500  | 1                  | <i>SLC32A1</i>    | 0.58416815    |
| rs780094   | 2   | 27240853  | 27713853  | 23                 | <i>UCN</i>        | 0.23136092    |
| rs11720805 | 3   | 158024492 | 158586492 | 3                  | <i>CCNL1</i>      | 0.81344738    |
| rs1838932  | 7   | 129823285 | 130370285 | 6                  | <i>TSGA14</i>     | 0.72429227    |
| rs12443533 | 16  | 18884000  | 19015000  | 2                  | <i>COQ7</i>       | 0.078747098   |
| rs2035794  | 4   | 130422345 | 131061845 | 0                  |                   | N/A           |
| rs2113060  | 5   | 36820000  | 37790500  | 5                  | <i>NUP155</i>     | 0.9640783     |
| rs867150   | 5   | 129902000 | 131349500 | 6                  | <i>RAPGEF6</i>    | 0.95222908    |
| rs6973074  | 7   | 154108285 | 154139285 | 1                  | <i>DPP6</i>       | 1             |
| rs11597063 | 10  | 7471500   | 7570500   | 1                  | <i>SFMBT2</i>     | 0.61749778    |
| rs7739842  | 6   | 131938500 | 132018000 | 4                  | <i>ARG1</i>       | 0.36943389    |
| rs16849413 | 1   | 160305966 | 160533466 | 1                  | <i>NOS1AP</i>     | 0.74201041    |
| rs6738627  | 2   | 165207739 | 165342739 | 1                  | <i>COBLL1</i>     | 1             |
| rs1304218  | 7   | 49127785  | 49701285  | 0                  |                   | N/A           |
| rs17526000 | 10  | 96987000  | 97031000  | 1                  | <i>PDLIM1</i>     | 1             |
| rs4842841  | 15  | 82278000  | 83256000  | 10                 | <i>SLC28A1</i>    | 0.45502052    |
| rs13231420 | 7   | 49852785  | 50165785  | 2                  | <i>VWC2</i>       | 0.20894234    |

**Supplementary Table 20.** Enrichment of leptin-associated loci ( $P < 1 \times 10^{-5}$ ) in the ChromHMM annotations for adipose and brain muscle tissues available from the Roadmap Epigenomics Project.

| Cell line ID | Tissue  | Cell Description   | Active Promoter | Enhancer | Bivalent Enhancer | Bivalent Poised TSS | Flanking Active TSS | Bivalent Flank TSS/Enhancer | Genic Enhancer | Heterochromatin | Quiescent /Low | Repressed PolyComb | Strong Transcription | Transcription at gene 5' or 3' | Weak Repressed | Weak Transcription |
|--------------|---------|--------------------|-----------------|----------|-------------------|---------------------|---------------------|-----------------------------|----------------|-----------------|----------------|--------------------|----------------------|--------------------------------|----------------|--------------------|
|              |         |                    | P value         | P value  | P value           | P value             | P value             | P value                     | P value        | P value         | P value        | P value            | P value              | P value                        | P value        | P value            |
| E023         | Mesench | FAT.MSC.DR.ADIP    | 0.868           | 0.367    | 1                 | 1                   | 0.375               | 1                           | 0.558          | 0.022           | 0.583          | 0.676              | 0.036                | 1                              | 0.540          | 0.327              |
| E025         | Mesench | FAT.ADIP.DR.MSC    | 0.561           | 0.064    | 1                 | 1                   | 0.593               | 1                           | 0.650          | 0.081           | 0.294          | 0.782              | 0.330                | 1                              | 0.253          | 0.336              |
| E063         | Adipose | FAT.ADIP.NUC       | 0.718           | 0.072    | 1                 | 1                   | 1                   | 1                           | 0.163          | 0.360           | 0.809          | 0.713              | 0.142                | 1                              | 0.598          | 0.013              |
| E067         | Brain   | BRN.ANG.GYR        | 0.546           | 0.451    | 1                 | 1                   | 1                   | 1                           | 1              | 0.065           | 0.568          | 1                  | 0.073                | 1                              | 0.746          | 0.151              |
| E068         | Brain   | BRN.ANT.CAUD       | 0.620           | 0.567    | 1                 | 1                   | 0.355               | 1                           | 1              | 0.186           | 0.889          | 1                  | 0.152                | 1                              | 0.462          | 0.391              |
| E069         | Brain   | BRN.CING.GYR       | 0.850           | 0.313    | 1                 | 1                   | 0.299               | 1                           | 1              | 0.050           | 0.929          | 0.513              | 0.289                | 1                              | 0.727          | 0.313              |
| E070         | Brain   | BRN.GRM.MTRX       | 0.755           | 0.272    | 1                 | 1                   | 0.268               | 1                           | 1              | 0.136           | 0.960          | 0.634              | 0.353                | 1                              | 0.629          | 0.222              |
| E071         | Brain   | BRN.HIPP.MID       | 0.850           | 0.411    | 1                 | 1                   | 0.395               | 1                           | 1              | 0.014           | 0.605          | 0.483              | 0.356                | 1                              | 0.503          | 0.350              |
| E072         | Brain   | BRN.INF.TMP        | 0.563           | 0.735    | 1                 | 1                   | 0.702               | 1                           | 1              | 0.030           | 0.475          | 1                  | 0.343                | 1                              | 0.378          | 0.533              |
| E073         | Brain   | BRN.DLPRFRNTL.CRTX | 0.248           | 0.586    | 1                 | 1                   | 1                   | 1                           | 1              | 0.309           | 0.514          | 0.349              | 0.255                | 1                              | 0.543          | 0.484              |
| E074         | Brain   | BRN.SUB.NIG        | 1               | 0.352    | 1                 | 1                   | 0.659               | 1                           | 0.062          | 0.004           | 0.600          | 1                  | 0.242                | 1                              | 0.452          | 0.147              |
| E081         | Brain   | BRN.FET.M          | 1               | 0.456    | 1                 | 1                   | 0.564               | 1                           | 1              | 0.046           | 0.949          | 0.501              | 0.249                | 1                              | 0.064          | 0.187              |
| E082         | Brain   | BRN.FET.F          | 0.187           | 0.584    | 1                 | 1                   | 0.646               | 1                           | 1              | 0.043           | 0.956          | 0.712              | 0.410                | 1                              | 0.112          | 0.126              |
| E125         | Brain   | BRN.NHA            | 1               | 0.703    | 1                 | 1                   | 0.800               | 1                           | 0.373          | 0.523           | 0.903          | 0.408              | 0.313                | 1                              | 0.250          | 0.281              |

**Supplementary Table 21.** Association of established susceptibility loci for BMI and extreme obesity with BMI-unadjusted levels of leptin.

| SNP                        | Chr | Position (bp, hg18) | Nearest gene | Effect allele <sup>a</sup> | Other allele | EAF (%) | Per-allele effect on leptin <sup>b</sup> | P-value  | N      |
|----------------------------|-----|---------------------|--------------|----------------------------|--------------|---------|------------------------------------------|----------|--------|
| <b>BMI associated loci</b> |     |                     |              |                            |              |         |                                          |          |        |
| rs977747                   | 1   | 47,457,264          | TAL1         | T                          | G            | 38%     | 0.005                                    | 4.72E-01 | 32,086 |
| rs657452                   | 1   | 49,362,434          | AGBL4        | A                          | G            | 39%     | 0.010                                    | 1.54E-01 | 29,453 |
| rs11583200                 | 1   | 50,332,407          | ELAVL4       | C                          | T            | 39%     | 0.006                                    | 3.65E-01 | 32,153 |
| rs3101336                  | 1   | 72,523,773          | NEGR1        | C                          | T            | 63%     | 0.009                                    | 1.86E-01 | 32,154 |
| rs12566985                 | 1   | 74,774,781          | FPGT-TNNI3K  | G                          | A            | 46%     | 0.010                                    | 1.05E-01 | 32,055 |
| rs12401738                 | 1   | 78,219,349          | FUBP1        | A                          | G            | 33%     | 0.012                                    | 8.34E-02 | 32,119 |
| rs11165643                 | 1   | 96,696,685          | PTBP2        | T                          | C            | 58%     | 0.014                                    | 2.63E-02 | 32,136 |
| rs17024393                 | 1   | 109,956,211         | GNAT2        | C                          | T            | 4%      | 0.039                                    | 3.41E-02 | 30,500 |
| rs543874                   | 1   | 176,156,103         | SEC16B       | G                          | A            | 18%     | 0.009                                    | 2.89E-01 | 32,081 |
| rs2820292                  | 1   | 200,050,910         | NAV1         | C                          | A            | 54%     | 0.005                                    | 4.58E-01 | 29,470 |
| rs13021737                 | 2   | 622,348             | TMEM18       | G                          | A            | 82%     | 0.028                                    | 1.13E-03 | 29,472 |
| rs10182181                 | 2   | 25,003,800          | ADCY3        | G                          | A            | 46%     | 0.014                                    | 3.11E-02 | 32,141 |
| rs11126666                 | 2   | 26,782,315          | KCNK3        | A                          | G            | 29%     | -0.001                                   | 8.75E-01 | 32,093 |
| rs1016287                  | 2   | 59,159,129          | FLJ30838     | T                          | C            | 28%     | 0.008                                    | 2.85E-01 | 29,472 |
| rs11688816                 | 2   | 62,906,552          | EHBP1        | G                          | A            | 51%     | 0.008                                    | 1.88E-01 | 32,159 |
| rs2121279                  | 2   | 142,759,755         | LRP1B        | T                          | C            | 16%     | 0.004                                    | 6.94E-01 | 32,083 |
| rs1460676                  | 2   | 164,275,935         | FIGN         | C                          | T            | 18%     | 0.012                                    | 1.42E-01 | 32,143 |
| rs1528435                  | 2   | 181,259,207         | UBE2E3       | T                          | C            | 64%     | 0.003                                    | 6.60E-01 | 32,093 |
| rs17203016                 | 2   | 207,963,763         | CREB1        | G                          | A            | 19%     | 0.006                                    | 5.02E-01 | 32,113 |
| rs7599312                  | 2   | 213,121,476         | ERBB4        | G                          | A            | 73%     | 0.003                                    | 6.79E-01 | 32,104 |
| rs492400                   | 2   | 219,057,996         | USP37        | C                          | T            | 43%     | 0.006                                    | 3.17E-01 | 32,030 |
| rs2176040                  | 2   | 226,801,046         | LOC646736    | A                          | G            | 36%     | 0.022                                    | 6.37E-04 | 32,157 |
| rs6804842                  | 3   | 25,081,441          | RARB         | G                          | A            | 56%     | 0.008                                    | 2.63E-01 | 29,468 |
| rs2365389                  | 3   | 61,211,502          | FHIT         | C                          | T            | 58%     | 0.021                                    | 1.56E-03 | 29,472 |
| rs3849570                  | 3   | 81,874,802          | GBE1         | A                          | C            | 35%     | 0.004                                    | 5.08E-01 | 32,127 |
| rs13078960                 | 3   | 85,890,280          | CADM2        | G                          | T            | 20%     | -0.002                                   | 7.98E-01 | 32,137 |
| rs16851483                 | 3   | 142,758,126         | RASA2        | T                          | G            | 7%      | 0.022                                    | 8.53E-02 | 32,155 |
| rs1516725                  | 3   | 187,306,698         | ETV5         | C                          | T            | 87%     | 0.000                                    | 9.83E-01 | 32,129 |
| rs10938397                 | 4   | 44,877,284          | GNPDA2       | G                          | A            | 44%     | 0.020                                    | 4.11E-03 | 29,471 |
| rs17001654                 | 4   | 77,348,592          | SCARB2       | G                          | C            | 16%     | 0.002                                    | 8.30E-01 | 29,467 |
| rs13107325                 | 4   | 103,407,732         | SLC39A8      | T                          | C            | 8%      | 0.028                                    | 4.47E-02 | 31,320 |
| rs11727676                 | 4   | 145,878,514         | HHIP         | T                          | C            | 92%     | 0.003                                    | 8.51E-01 | 27,848 |
| rs2112347                  | 5   | 75,050,998          | POC5         | T                          | G            | 62%     | 0.013                                    | 4.39E-02 | 32,050 |
| rs7715256                  | 5   | 153,518,086         | GALNT10      | G                          | T            | 42%     | 0.000                                    | 9.49E-01 | 32,109 |
| rs205262                   | 6   | 34,671,142          | C6orf106     | G                          | A            | 28%     | 0.001                                    | 9.43E-01 | 32,160 |
| rs2033529                  | 6   | 40,456,631          | TDRG1        | G                          | A            | 29%     | 0.012                                    | 1.20E-01 | 29,470 |
| rs2207139                  | 6   | 50,953,449          | TFAP2B       | G                          | A            | 17%     | 0.020                                    | 1.42E-02 | 32,132 |

| SNP        | Chr | Position<br>(bp, hg18) | Nearest gene        | Effect<br>allele <sup>a</sup> | Other<br>allele | EAF (%) | Per-allele<br>effect on<br>leptin <sup>b</sup> | P-value  | N      |
|------------|-----|------------------------|---------------------|-------------------------------|-----------------|---------|------------------------------------------------|----------|--------|
| rs9400239  | 6   | 109,084,356            | <i>FOXO3</i>        | C                             | T               | 67%     | 0.019                                          | 8.22E-03 | 29,472 |
| rs9374842  | 6   | 120,227,364            | <i>LOC285762</i>    | T                             | C               | 75%     | 0.013                                          | 7.72E-02 | 32,110 |
| rs13201877 | 6   | 137,717,234            | <i>IFNGR1</i>       | G                             | A               | 14%     | 0.017                                          | 6.65E-02 | 32,155 |
| rs13191362 | 6   | 162,953,340            | <i>PARK2</i>        | A                             | G               | 88%     | 0.010                                          | 3.22E-01 | 32,097 |
| rs1167827  | 7   | 75,001,105             | <i>HIP1</i>         | G                             | A               | 53%     | 0.008                                          | 2.48E-01 | 30,759 |
| rs2245368  | 7   | 76,446,079             | <i>PMS2L11</i>      | C                             | T               | 18%     | 0.001                                          | 9.49E-01 | 25,507 |
| rs9641123  | 7   | 93,035,668             | <i>CALCR</i>        | C                             | G               | 42%     | 0.002                                          | 8.17E-01 | 29,469 |
| rs6465468  | 7   | 95,007,450             | <i>ASB4</i>         | T                             | G               | 30%     | 0.016                                          | 4.02E-02 | 29,468 |
| rs17405819 | 8   | 76,969,139             | <i>HNF4G</i>        | T                             | C               | 70%     | 0.009                                          | 2.20E-01 | 29,472 |
| rs16907751 | 8   | 81,538,012             | <i>ZBTB10</i>       | C                             | T               | 95%     | -0.004                                         | 8.34E-01 | 29,472 |
| rs2033732  | 8   | 85,242,264             | <i>RALYL</i>        | C                             | T               | 75%     | 0.007                                          | 3.83E-01 | 29,472 |
| rs4740619  | 9   | 15,624,326             | <i>C9orf93</i>      | T                             | C               | 54%     | 0.006                                          | 3.83E-01 | 32,135 |
| rs10968576 | 9   | 28,404,339             | <i>LINGO2</i>       | G                             | A               | 32%     | 0.013                                          | 4.88E-02 | 32,156 |
| rs6477694  | 9   | 110,972,163            | <i>EPB41L4B</i>     | C                             | T               | 36%     | 0.006                                          | 3.98E-01 | 32,154 |
| rs1928295  | 9   | 119,418,304            | <i>TLR4</i>         | T                             | C               | 54%     | 0.007                                          | 2.60E-01 | 32,121 |
| rs10733682 | 9   | 128,500,735            | <i>LMX1B</i>        | A                             | G               | 48%     | 0.005                                          | 4.51E-01 | 32,153 |
| rs7899106  | 10  | 87,400,884             | <i>GRID1</i>        | G                             | A               | 5%      | 0.013                                          | 3.88E-01 | 32,118 |
| rs17094222 | 10  | 102,385,430            | <i>HIF1AN</i>       | C                             | T               | 21%     | 0.018                                          | 3.28E-02 | 29,010 |
| rs11191560 | 10  | 104,859,028            | <i>NT5C2</i>        | C                             | T               | 9%      | -0.001                                         | 9.20E-01 | 32,121 |
| rs7903146  | 10  | 114,748,339            | <i>TCF7L2</i>       | C                             | T               | 71%     | 0.010                                          | 1.57E-01 | 32,160 |
| rs4256980  | 11  | 8,630,515              | <i>TRIM66</i>       | G                             | C               | 64%     | 0.007                                          | 2.68E-01 | 32,153 |
| rs11030104 | 11  | 27,641,093             | <i>BDNF</i>         | A                             | G               | 79%     | 0.023                                          | 2.59E-03 | 32,127 |
| rs2176598  | 11  | 43,820,854             | <i>HSD17B12</i>     | T                             | C               | 26%     | 0.016                                          | 2.98E-02 | 29,472 |
| rs3817334  | 11  | 47,607,569             | <i>MTCH2</i>        | T                             | C               | 40%     | 0.021                                          | 9.25E-04 | 32,084 |
| rs12286929 | 11  | 114,527,614            | <i>CADM1</i>        | G                             | A               | 53%     | 0.013                                          | 5.06E-02 | 29,464 |
| rs7138803  | 12  | 48,533,735             | <i>BCDIN3D</i>      | A                             | G               | 38%     | 0.011                                          | 1.03E-01 | 32,077 |
| rs11057405 | 12  | 121,347,850            | <i>CLIP1</i>        | G                             | A               | 91%     | 0.014                                          | 2.48E-01 | 30,525 |
| rs12016871 | 13  | 26,915,782             | <i>MTIF3</i>        | T                             | C               | 20%     | 0.003                                          | 7.01E-01 | 32,044 |
| rs12429545 | 13  | 53,000,207             | <i>OLFM4</i>        | A                             | G               | 14%     | 0.020                                          | 4.12E-02 | 32,148 |
| rs9540493  | 13  | 65,103,705             | <i>MIR548X2</i>     | A                             | G               | 44%     | 0.002                                          | 7.56E-01 | 26,915 |
| rs1441264  | 13  | 78,478,920             | <i>MIR548A2</i>     | A                             | G               | 62%     | 0.004                                          | 5.61E-01 | 31,317 |
| rs10132280 | 14  | 24,998,019             | <i>STXBP6</i>       | C                             | A               | 67%     | -0.003                                         | 7.15E-01 | 29,470 |
| rs12885454 | 14  | 28,806,589             | <i>PRKD1</i>        | C                             | A               | 65%     | 0.009                                          | 1.71E-01 | 31,861 |
| rs11847697 | 14  | 29,584,863             | <i>PRKD1</i>        | T                             | C               | 4%      | 0.039                                          | 2.48E-02 | 32,062 |
| rs7141420  | 14  | 78,969,207             | <i>NRXN3</i>        | T                             | C               | 54%     | 0.007                                          | 2.73E-01 | 32,058 |
| rs3736485  | 15  | 49,535,902             | <i>DMXL2</i>        | A                             | G               | 46%     | 0.007                                          | 3.03E-01 | 29,468 |
| rs16951275 | 15  | 65,864,222             | <i>MAP2K5</i>       | T                             | C               | 79%     | 0.021                                          | 7.47E-03 | 32,154 |
| rs7164727  | 15  | 70,881,044             | <i>LOC100287559</i> | T                             | C               | 68%     | 0.009                                          | 1.74E-01 | 32,082 |

| SNP                                    | Chr | Position (bp, hg18) | Nearest gene     | Effect allele <sup>a</sup> | Other allele | EAF (%) | Per-allele effect on leptin <sup>b</sup> | P-value  | N      |
|----------------------------------------|-----|---------------------|------------------|----------------------------|--------------|---------|------------------------------------------|----------|--------|
| rs12446632                             | 16  | 19,842,890          | <i>GPRC5B</i>    | G                          | A            | 87%     | 0.027                                    | 4.09E-03 | 32,157 |
| rs2650492                              | 16  | 28,240,912          | <i>SBK1</i>      | A                          | G            | 30%     | 0.022                                    | 3.94E-03 | 32,156 |
| rs3888190                              | 16  | 28,796,987          | <i>ATP2A1</i>    | A                          | C            | 39%     | 0.027                                    | 3.02E-05 | 32,157 |
| rs4787491                              | 16  | 29,922,838          | <i>INO80E</i>    | G                          | A            | 49%     | 0.015                                    | 4.69E-02 | 22,925 |
| rs9925964                              | 16  | 31,037,396          | <i>KAT8</i>      | A                          | G            | 61%     | 0.015                                    | 2.84E-02 | 29,471 |
| rs2080454                              | 16  | 47,620,091          | <i>CBLN1</i>     | C                          | A            | 40%     | 0.003                                    | 6.23E-01 | 32,089 |
| rs1558902                              | 16  | 52,361,075          | <i>FTO</i>       | A                          | T            | 42%     | 0.033                                    | 2.32E-07 | 32,041 |
| rs9914578                              | 17  | 1,951,886           | <i>SMG6</i>      | G                          | C            | 21%     | -0.008                                   | 2.81E-01 | 32,145 |
| rs1000940                              | 17  | 5,223,976           | <i>RABEP1</i>    | G                          | A            | 32%     | 0.015                                    | 2.88E-02 | 32,157 |
| rs12940622                             | 17  | 76,230,166          | <i>RPTOR</i>     | G                          | A            | 58%     | 0.013                                    | 4.72E-02 | 32,149 |
| rs1808579                              | 18  | 19,358,886          | <i>C18orf8</i>   | C                          | T            | 54%     | 0.004                                    | 5.12E-01 | 32,155 |
| rs7239883                              | 18  | 38,401,669          | <i>LOC284260</i> | G                          | A            | 40%     | 0.014                                    | 2.87E-02 | 32,002 |
| rs7243357                              | 18  | 55,034,299          | <i>GRP</i>       | T                          | G            | 81%     | 0.006                                    | 4.73E-01 | 29,472 |
| rs6567160                              | 18  | 55,980,115          | <i>MC4R</i>      | C                          | T            | 23%     | 0.027                                    | 4.21E-04 | 32,057 |
| rs17724992                             | 19  | 18,315,825          | <i>PGPEP1</i>    | A                          | G            | 75%     | -0.004                                   | 6.54E-01 | 28,856 |
| rs29941                                | 19  | 39,001,372          | <i>KCTD15</i>    | G                          | A            | 67%     | 0.009                                    | 1.68E-01 | 32,160 |
| rs2075650                              | 19  | 50,087,459          | <i>TOMM40</i>    | A                          | G            | 85%     | 0.025                                    | 1.55E-02 | 28,973 |
| rs2287019                              | 19  | 50,894,012          | <i>QPCTL</i>     | C                          | T            | 80%     | 0.014                                    | 1.32E-01 | 28,323 |
| rs3810291                              | 19  | 52,260,843          | <i>ZC3H4</i>     | A                          | G            | 66%     | 0.008                                    | 2.75E-01 | 29,467 |
| rs6091540                              | 20  | 50,521,269          | <i>ZFP64</i>     | C                          | T            | 74%     | 0.002                                    | 7.69E-01 | 29,472 |
| rs2836754                              | 21  | 39,213,610          | <i>ETS2</i>      | C                          | T            | 59%     | 0.007                                    | 3.10E-01 | 29,468 |
| <b>Extreme obesity associated loci</b> |     |                     |                  |                            |              |         |                                          |          |        |
| rs11208659                             | 1   | 65,751,868          | <i>LEPR</i>      | C                          | T            | 9%      | 0.026                                    | 2.18E-02 | 32,138 |
| rs17381664                             | 1   | 77,820,919          | <i>ZZZ3</i>      | C                          | T            | 37%     | 0.012                                    | 6.45E-02 | 32,113 |
| rs17150703                             | 8   | 9,783,208           | <i>MSRA</i>      | A                          | G            | 12%     | 0.006                                    | 5.51E-01 | 32,051 |
| rs10508503                             | 10  | 16,339,957          | <i>PTER</i>      | C                          | T            | 91%     | 0.029                                    | 2.37E-02 | 29,469 |
| rs564343                               | 11  | 65,651,742          | <i>PACS1</i>     | A                          | G            | 41%     | 0.026                                    | 5.49E-01 | 840    |
| rs11109072                             | 12  | 96,425,401          | <i>RMST</i>      | A                          | C            | 6%      | -0.020                                   | 1.85E-01 | 29,472 |
| rs7989336                              | 13  | 95,815,549          | <i>HS6ST3</i>    | A                          | G            | 51%     | 0.006                                    | 5.27E-03 | 32,077 |
| rs1957894                              | 14  | 60,977,864          | <i>PRKCH</i>     | T                          | G            | 9%      | -0.028                                   | 1.50E-02 | 32,129 |
| rs2531995                              | 16  | 3,953,468           | <i>ADCY9</i>     | T                          | C            | 60%     | 0.015                                    | 3.57E-02 | 32,150 |
| rs1424233                              | 16  | 78,240,252          | <i>MAF</i>       | A                          | G            | 47%     | 0.000                                    | 9.87E-01 | 32,156 |
| rs1805081                              | 18  | 19,394,430          | <i>NPC1</i>      | A                          | G            | 59%     | 0.002                                    | 8.15E-01 | 32,155 |
| rs13041126                             | 20  | 50,526,403          | <i>MRPS33P4</i>  | T                          | C            | 73%     | 0.000                                    | 9.54E-01 | 32,145 |

Chr, chromosome; EAF, Effect allele frequency.

<sup>a</sup> The effect allele is the allele associated with increased BMI and extreme obesity risk.

<sup>b</sup> Effects sizes are expressed for logarighmically transformed BMI-unadjusted leptin levels

**Supplementary Table 22.** Association of established susceptibility loci for WHRadjBMI with BMI-adjusted levels of leptin.

| SNP        | Chr | Position (bp, hg18) | Nearest gene          | Effect allele <sup>a</sup> | Other allele | EAF (%) | Men and women                                   |          |        | Men                                             |          |        | Women                                           |          |        |
|------------|-----|---------------------|-----------------------|----------------------------|--------------|---------|-------------------------------------------------|----------|--------|-------------------------------------------------|----------|--------|-------------------------------------------------|----------|--------|
|            |     |                     |                       |                            |              |         | Per-allele effect on BMIadj leptin <sup>b</sup> | P-value  | N      | Per-allele effect on BMIadj leptin <sup>b</sup> | P-value  | N      | Per-allele effect on BMIadj leptin <sup>b</sup> | P-value  | N      |
| rs2645294  | 1   | 119,376,110         | <i>TBX15-WARS2</i>    | t                          | c            | 58%     | 0.0001                                          | 9.84E-01 | 31,775 | 0.0071                                          | 3.93E-01 | 13,177 | -0.0034                                         | 5.81E-01 | 18,598 |
| rs905938   | 1   | 153,258,013         | <i>DCST2</i>          | t                          | c            | 74%     | -0.0089                                         | 1.41E-01 | 31,247 | 0.0015                                          | 8.84E-01 | 12,894 | -0.0148                                         | 4.53E-02 | 18,353 |
| rs10919388 | 1   | 168,639,127         | <i>GORAB</i>          | c                          | a            | 72%     | 0.0010                                          | 8.46E-01 | 31,813 | 0.0013                                          | 8.87E-01 | 13,177 | 0.0008                                          | 9.09E-01 | 18,636 |
| rs714515   | 1   | 170,619,613         | <i>DNM3-PIGC</i>      | g                          | a            | 43%     | 0.0000                                          | 9.99E-01 | 31,785 | 0.0063                                          | 4.38E-01 | 13,177 | -0.0045                                         | 4.54E-01 | 18,608 |
| rs2820443  | 1   | 217,820,132         | <i>LYPLAL1</i>        | t                          | c            | 72%     | 0.0047                                          | 3.85E-01 | 31,776 | 0.0064                                          | 4.76E-01 | 13,177 | 0.0025                                          | 7.06E-01 | 18,599 |
| rs1385167  | 2   | 66,054,152          | <i>MEIS1</i>          | g                          | a            | 15%     | 0.0030                                          | 6.66E-01 | 31,702 | 0.0075                                          | 5.16E-01 | 13,176 | 0.0011                                          | 8.98E-01 | 18,526 |
| rs10195252 | 2   | 165,221,337         | <i>GRB14-COBL1</i>    | t                          | c            | 60%     | -0.0187                                         | 1.76E-04 | 31,810 | -0.0142                                         | 9.17E-02 | 13,175 | -0.0217                                         | 4.41E-04 | 18,635 |
| rs1569135  | 2   | 187,823,643         | <i>CALCRL</i>         | a                          | g            | 53%     | -0.0004                                         | 9.30E-01 | 31,814 | 0.0006                                          | 9.41E-01 | 13,176 | -0.0015                                         | 7.97E-01 | 18,638 |
| rs17819328 | 3   | 12,464,342          | <i>PPARG</i>          | g                          | t            | 44%     | -0.0046                                         | 3.81E-01 | 29,251 | -0.0030                                         | 7.21E-01 | 13,174 | -0.0052                                         | 4.43E-01 | 16,077 |
| rs2276824  | 3   | 52,612,526          | <i>PBRM1c</i>         | c                          | g            | 43%     | 0.0021                                          | 6.94E-01 | 29,256 | 0.0009                                          | 9.20E-01 | 13,177 | 0.0043                                          | 5.36E-01 | 16,080 |
| rs2371767  | 3   | 64,693,298          | <i>ADAMTS9</i>        | g                          | c            | 71%     | 0.0040                                          | 4.89E-01 | 29,257 | 0.0077                                          | 4.04E-01 | 13,177 | 0.0025                                          | 7.31E-01 | 16,080 |
| rs10804591 | 3   | 130,816,923         | <i>PLXND1</i>         | a                          | c            | 79%     | -0.0095                                         | 1.07E-01 | 31,811 | -0.0097                                         | 3.35E-01 | 13,174 | -0.0084                                         | 2.46E-01 | 18,637 |
| rs17451107 | 3   | 158,280,303         | <i>LEKR1</i>          | t                          | c            | 61%     | 0.0226                                          | 5.11E-05 | 29,257 | 0.0128                                          | 1.52E-01 | 13,177 | 0.0279                                          | 8.20E-05 | 16,080 |
| rs3805389  | 4   | 56,177,507          | <i>NMU</i>            | a                          | g            | 28%     | 0.0025                                          | 6.42E-01 | 31,815 | -0.0132                                         | 1.56E-01 | 13,177 | 0.0099                                          | 1.44E-01 | 18,639 |
| rs9991328  | 4   | 89,932,144          | <i>FAM13A</i>         | t                          | c            | 49%     | -0.0064                                         | 1.88E-01 | 31,812 | -0.0145                                         | 7.83E-02 | 13,176 | -0.0017                                         | 7.79E-01 | 18,636 |
| rs303084   | 4   | 124,286,398         | <i>SPATA5-FGF2</i>    | a                          | g            | 80%     | 0.0013                                          | 8.28E-01 | 31,813 | 0.0223                                          | 2.86E-02 | 13,175 | -0.0088                                         | 2.44E-01 | 18,638 |
| rs9687846  | 5   | 55,897,651          | <i>MAP3K1</i>         | a                          | g            | 19%     | -0.0117                                         | 7.78E-02 | 29,256 | -0.0102                                         | 3.35E-01 | 13,177 | -0.0127                                         | 1.36E-01 | 16,079 |
| rs1045241  | 5   | 118,757,185         | <i>TNFAIP3-HSD17B</i> | c                          | t            | 71%     | -0.0043                                         | 4.51E-01 | 29,249 | -0.0029                                         | 7.51E-01 | 13,173 | -0.0052                                         | 4.81E-01 | 16,076 |
| rs7705502  | 5   | 173,253,421         | <i>CPEB4</i>          | a                          | g            | 33%     | -0.0105                                         | 4.36E-02 | 31,812 | -0.0252                                         | 4.08E-03 | 13,177 | -0.0021                                         | 7.38E-01 | 18,635 |
| rs6556301  | 5   | 176,460,183         | <i>FGFR4</i>          | t                          | g            | 35%     | 0.0043                                          | 4.28E-01 | 31,808 | 0.0085                                          | 3.57E-01 | 13,173 | 0.0023                                          | 7.33E-01 | 18,635 |
| rs1294410  | 6   | 6,683,751           | <i>LY86</i>           | t                          | c            | 63%     | -0.0135                                         | 1.18E-02 | 29,253 | -0.0130                                         | 1.30E-01 | 13,175 | -0.0123                                         | 7.10E-02 | 16,078 |
| rs7759742  | 6   | 32,489,714          | <i>BTNL2</i>          | a                          | t            | 51%     | -0.0101                                         | 5.42E-02 | 29,257 | -0.0082                                         | 3.25E-01 | 13,177 | -0.0121                                         | 6.90E-02 | 16,080 |
| rs1776897  | 6   | 34,302,989          | <i>HMG1</i>           | g                          | t            | 8%      | -0.0082                                         | 4.61E-01 | 23,693 | -0.0333                                         | 9.96E-02 | 9,339  | 0.0006                                          | 9.65E-01 | 14,355 |
| rs1358980  | 6   | 43,872,529          | <i>VEGFA</i>          | t                          | c            | 47%     | 0.0068                                          | 2.30E-01 | 29,255 | -0.0009                                         | 9.19E-01 | 13,176 | 0.0115                                          | 1.06E-01 | 16,079 |
| rs1936805  | 6   | 127,493,809         | <i>RSPO3</i>          | t                          | c            | 51%     | -0.0148                                         | 3.90E-03 | 29,235 | -0.0065                                         | 4.25E-01 | 13,163 | -0.0200                                         | 2.33E-03 | 16,072 |

| SNP        | Chr | Position<br>(bp, hg18) | Nearest gene  | Effect<br>allele <sup>a</sup> | Other<br>allele | EAF (%) | Men and women                                            |          |        | Men                                                      |          |        | Women                                                    |          |        |
|------------|-----|------------------------|---------------|-------------------------------|-----------------|---------|----------------------------------------------------------|----------|--------|----------------------------------------------------------|----------|--------|----------------------------------------------------------|----------|--------|
|            |     |                        |               |                               |                 |         | Per-allele<br>effect on<br>BMIadj<br>leptin <sup>b</sup> | P-value  | N      | Per-allele<br>effect on<br>BMIadj<br>leptin <sup>b</sup> | P-value  | N      | Per-allele<br>effect on<br>BMIadj<br>leptin <sup>b</sup> | P-value  | N      |
| rs10245353 | 7   | 25,825,139             | NFE2L3        | a                             | c               | 21%     | 0.0093                                                   | 1.45E-01 | 29,254 | 0.0105                                                   | 3.03E-01 | 13,176 | 0.0089                                                   | 2.80E-01 | 16,077 |
| rs1534696  | 7   | 26,363,764             | SNX10         | c                             | a               | 44%     | -0.0032                                                  | 5.42E-01 | 29,219 | 0.0019                                                   | 8.26E-01 | 13,163 | -0.0069                                                  | 3.06E-01 | 16,056 |
| rs7801581  | 7   | 27,190,296             | HOXA11        | t                             | c               | 25%     | 0.0174                                                   | 7.06E-03 | 29,254 | 0.0201                                                   | 5.23E-02 | 13,177 | 0.0151                                                   | 6.76E-02 | 16,078 |
| rs7830933  | 8   | 23,659,269             | NKX2-6        | a                             | g               | 76%     | 0.0017                                                   | 7.66E-01 | 31,772 | 0.0007                                                   | 9.45E-01 | 13,177 | -0.0032                                                  | 6.48E-01 | 18,595 |
| rs12679556 | 8   | 72,676,782             | MSC           | g                             | t               | 25%     | -0.0093                                                  | 9.63E-02 | 31,790 | 0.0005                                                   | 9.58E-01 | 13,174 | -0.0148                                                  | 3.37E-02 | 18,616 |
| rs10991437 | 9   | 106,775,741            | ABCA1         | a                             | c               | 11%     | 0.0031                                                   | 6.95E-01 | 30,920 | 0.0164                                                   | 2.33E-01 | 12,378 | -0.0035                                                  | 7.21E-01 | 18,542 |
| rs7917772  | 10  | 104,477,433            | SFXN2         | a                             | g               | 62%     | 0.0016                                                   | 7.46E-01 | 31,753 | 0.0086                                                   | 3.12E-01 | 13,173 | -0.0013                                                  | 8.34E-01 | 18,580 |
| rs11231693 | 11  | 63,619,188             | MACROD1-VEGFE | a                             | g               | 6%      | 0.0106                                                   | 3.42E-01 | 28,301 | 0.0123                                                   | 4.89E-01 | 12,702 | 0.0095                                                   | 5.05E-01 | 15,599 |
| rs10842707 | 12  | 26,362,631             | ITPR2-SSPN    | t                             | c               | 23%     | -0.0023                                                  | 7.09E-01 | 29,257 | 0.0008                                                   | 9.37E-01 | 13,177 | -0.0043                                                  | 5.85E-01 | 16,080 |
| rs1443512  | 12  | 52,628,951             | HOXC13        | a                             | c               | 24%     | -0.0022                                                  | 6.92E-01 | 31,814 | 0.0065                                                   | 4.88E-01 | 13,177 | -0.0084                                                  | 2.32E-01 | 18,637 |
| rs4765219  | 12  | 123,006,063            | CCDC92        | c                             | a               | 67%     | -0.0041                                                  | 4.25E-01 | 31,794 | -0.0106                                                  | 2.27E-01 | 13,176 | -0.0014                                                  | 8.23E-01 | 18,618 |
| rs8042543  | 15  | 29,495,555             | KLF13         | c                             | t               | 78%     | 0.0178                                                   | 9.48E-03 | 29,253 | 0.0271                                                   | 1.41E-02 | 13,175 | 0.0117                                                   | 1.78E-01 | 16,077 |
| rs8030605  | 15  | 54,291,890             | RFX7          | a                             | g               | 15%     | 0.0050                                                   | 5.09E-01 | 31,791 | 0.0002                                                   | 9.85E-01 | 13,173 | 0.0073                                                   | 4.28E-01 | 18,618 |
| rs1440372  | 15  | 64,820,205             | SMAD6         | c                             | t               | 72%     | 0.0055                                                   | 3.21E-01 | 31,782 | 0.0139                                                   | 1.37E-01 | 13,176 | 0.0006                                                   | 9.29E-01 | 18,606 |
| rs2925979  | 16  | 80,092,291             | CMIP          | t                             | c               | 30%     | 0.0019                                                   | 7.25E-01 | 31,807 | -0.0072                                                  | 4.32E-01 | 13,174 | 0.0057                                                   | 3.95E-01 | 18,633 |
| rs4646404  | 17  | 17,360,924             | PEMT          | g                             | a               | 66%     | -0.0080                                                  | 1.74E-01 | 29,252 | -0.0081                                                  | 3.93E-01 | 13,175 | -0.0078                                                  | 2.97E-01 | 16,078 |
| rs8066985  | 17  | 65,964,940             | KCNJ2         | a                             | g               | 50%     | -0.0046                                                  | 3.40E-01 | 31,734 | -0.0032                                                  | 7.01E-01 | 13,177 | -0.0051                                                  | 3.91E-01 | 18,557 |
| rs12454712 | 18  | 58,996,864             | BCL2          | t                             | c               | 60%     | -0.0008                                                  | 9.16E-01 | 25,401 | -0.0208                                                  | 7.87E-02 | 11,339 | 0.0138                                                   | 1.49E-01 | 14,062 |
| rs12608504 | 19  | 18,250,135             | JUND          | a                             | g               | 35%     | -0.0113                                                  | 2.64E-02 | 31,810 | -0.0123                                                  | 1.49E-01 | 13,174 | -0.0105                                                  | 9.66E-02 | 18,636 |
| rs4081724  | 19  | 38,516,786             | CEBPA         | g                             | a               | 86%     | -0.0105                                                  | 1.90E-01 | 29,256 | -0.0084                                                  | 5.11E-01 | 13,177 | -0.0111                                                  | 2.81E-01 | 16,079 |
| rs979012   | 20  | 6,571,374              | BMP2          | t                             | c               | 34%     | 0.0167                                                   | 1.05E-03 | 31,698 | 0.0186                                                   | 3.04E-02 | 13,175 | 0.0153                                                   | 1.53E-02 | 18,523 |
| rs224333   | 20  | 33,487,376             | GDF5          | g                             | a               | 62%     | 0.0073                                                   | 1.85E-01 | 29,257 | 0.0048                                                   | 5.83E-01 | 13,177 | 0.0101                                                   | 1.54E-01 | 16,080 |
| rs6090583  | 20  | 44,992,238             | EYA2          | a                             | g               | 49%     | -0.0177                                                  | 5.27E-04 | 29,254 | -0.0201                                                  | 1.36E-02 | 13,174 | -0.0154                                                  | 1.85E-02 | 16,080 |
| rs2294239  | 22  | 27,779,477             | ZNRF3-KREMEN1 | a                             | g               | 59%     | -0.0061                                                  | 2.22E-01 | 31,808 | -0.0058                                                  | 5.01E-01 | 13,173 | -0.0068                                                  | 2.73E-01 | 18,635 |

Chr, chromosome; EAF, Effect allele frequency.

<sup>a</sup> The effect allele is the allele associated with increased WHRadjBMI

<sup>b</sup> Effects sizes are expressed for logarithmically transformed leptin levels

Supplementary Table 23. Study-specific descriptive statistics of the participating studies.

| Study         | Men      |      |                        |      |            |       |            |      |                         |      |               |      |                            |      | Women           |      |          |      |                        |     |            |     |            |      |                         |      |               |      |                            |      |                 |  |
|---------------|----------|------|------------------------|------|------------|-------|------------|------|-------------------------|------|---------------|------|----------------------------|------|-----------------|------|----------|------|------------------------|-----|------------|-----|------------|------|-------------------------|------|---------------|------|----------------------------|------|-----------------|--|
|               | Age, yrs |      | BMI, kg/m <sup>2</sup> |      | Height, cm |       | Weight, kg |      | Body fat percentage (%) |      | Leptin, ng/ml |      | Correlation Leptin vs. BMI |      | Leptin vs. Fat% |      | Age, yrs |      | BMI, kg/m <sup>2</sup> |     | Height, cm |     | Weight, kg |      | Body fat percentage (%) |      | Leptin, ng/ml |      | Correlation Leptin vs. BMI |      | Leptin vs. Fat% |  |
|               | n*       | mean | SD                     | mean | SD         | mean  | SD         | mean | SD                      | mean | SD            | mean | SD                         | r    | r               | n*   | mean     | SD   | mean                   | SD  | mean       | SD  | mean       | SD   | mean                    | SD   | mean          | SD   | r                          | r    |                 |  |
| BLSA          | 250      | 72.7 | 13.0                   | 27.5 | 4.3        | 175.0 | 8.2        | 81.3 | 15.0                    | -    | -             | 14.9 | 15.6                       | 0.63 | -               | 137  | 68.0     | 14.1 | 28.0                   | 5.3 | 162.6      | 7.1 | 67.2       | 13.3 | -                       | -    | 38.3          | 4.7  | 0.70                       | -    |                 |  |
| BWHHS         | -        | -    | -                      | -    | -          | -     | -          | -    | -                       | -    | -             | -    | -                          | -    | -               | 500  | 70.2     | 5.4  | 27.7                   | 4.6 | 158.6      | 6.1 | 69.5       | 12.0 | -                       | -    | 27.2          | 19.3 | 0.73                       | -    |                 |  |
| COLAUS        | 2250     | 53.5 | 10.8                   | 27.0 | 3.8        | 172.0 | 7.3        | 82.7 | 12.8                    | 24.5 | 5.8           | 8.7  | 7.1                        | 0.55 | 0.49            | 2676 | 53.7     | 10.7 | 25.0                   | 4.6 | 162.7      | 6.7 | 66.0       | 12.1 | 34.3                    | 8.0  | 17.1          | 11.9 | 0.69                       | 0.54 |                 |  |
| Ely Study     | 741      | 61.5 | 9.1                    | 27.4 | 4.0        | 174.2 | 6.7        | 83.1 | 13.3                    | 26.6 | 5.2           | 9.6  | 8.4                        | 0.65 | 0.55            | 854  | 60.8     | 9.3  | 27.3                   | 5.4 | 161.4      | 6.1 | 71.1       | 14.3 | 39.9                    | 6.5  | 33.7          | 26.9 | 0.78                       | 0.66 |                 |  |
| ERF           | 839      | 49.6 | 15.7                   | 27.3 | 4.2        | 174.8 | 7.2        | 83.3 | 13.7                    | 26.8 | 7.1           | 24.6 | 29.5                       | 0.64 | 0.75            | 1112 | 50.7     | 16.4 | 26.5                   | 5.0 | 161.9      | 6.5 | 69.5       | 13.4 | 38.8                    | 7.6  | 74.9          | 65.1 | 0.68                       | 0.73 |                 |  |
| FamHS         | 737      | 52.5 | 13.9                   | 27.8 | 5.0        | 177.0 | 7.0        | 87.5 | 17.3                    | 26.9 | 8.2           | 8.5  | 7.0                        | 0.80 | 0.62            | 768  | 52.8     | 13.1 | 28.1                   | 6.9 | 160.0      | 6.5 | 74.5       | 18.6 | 38.1                    | 8.4  | 23.4          | 17.9 | 0.83                       | 0.72 |                 |  |
| Fenland       | 610      | 44.5 | 7.3                    | 27.6 | 3.9        | 177.3 | 6.5        | 86.7 | 13.9                    | 28.0 | 6.7           | 7.6  | 7.3                        | 0.68 | 0.73            | 785  | 45.4     | 7.2  | 26.7                   | 5.5 | 163.7      | 6.2 | 71.5       | 15.2 | 37.6                    | 7.6  | 23.9          | 20.4 | 0.79                       | 0.76 |                 |  |
| FinRisk97     | 245      | 52.2 | 13.1                   | 26.9 | 3.9        | 176.0 | 7.0        | 83.3 | 13.1                    | -    | -             | 6.4  | 5.5                        | 0.67 | -               | 275  | 59.1     | 10.6 | 26.3                   | 4.7 | 162.0      | 7.0 | 68.3       | 12.4 | -                       | -    | 19.6          | 14.9 | 0.76                       | -    |                 |  |
| GARP          | 38       | 60.1 | 7.9                    | 27.4 | 3.2        | 176.1 | 7.0        | 84.9 | 10.6                    | -    | -             | 5.4  | 6.7                        | 0.11 | -               | 202  | 58.4     | 7.0  | 27.4                   | 5.3 | 165.0      | 6.5 | 75.3       | 15.3 | -                       | -    | 9.2           | 8.6  | 0.39                       | -    |                 |  |
| GEMS cases    | 521      | 49.4 | 8.5                    | 28.6 | 3.2        | 177.4 | 6.9        | 90.2 | 12.1                    | -    | -             | 11.6 | 8.7                        | 0.51 | -               | 282  | 49.6     | 9.9  | 28.3                   | 3.7 | 162.6      | 5.8 | 74.9       | 10.7 | -                       | -    | 24.5          | 12.2 | 0.36                       | -    |                 |  |
| GEMS controls | 491      | 55.5 | 9.1                    | 28.0 | 3.4        | 177.4 | 6.6        | 88.1 | 12.8                    | -    | -             | 10.1 | 9.4                        | 0.47 | -               | 329  | 54.2     | 8.9  | 27.9                   | 2.9 | 162.5      | 6.1 | 73.7       | 9.7  | -                       | -    | 21.5          | 12.6 | 0.26                       | -    |                 |  |
| GLACIER       | 601      | 51.1 | 8.0                    | 26.1 | 3.6        | 176.4 | 6.8        | 81.3 | 11.5                    | -    | -             | 4.6  | 3.4                        | 0.70 | -               | 391  | 51.0     | 8.0  | 25.5                   | 4.1 | 164.0      | 5.6 | 68.7       | 11.6 | -                       | -    | 12.9          | 8.2  | 0.69                       | -    |                 |  |
| GOOD          | 938      | 18.9 | 0.6                    | 22.4 | 3.2        | 182.0 | 7.0        | 73.9 | 11.6                    | 17.1 | 7.3           | 7.7  | 8.6                        | 0.45 | 0.62            | -    | -        | -    | -                      | -   | -          | -   | -          | -    | -                       | -    | -             | -    | -                          | -    |                 |  |
| GOYA Male     | 270      | 49.7 | 6.2                    | 26.1 | 3.8        | 178.6 | 6.0        | 83.5 | 13.2                    | 21.7 | 8.1           | 4.8  | 3.5                        | 0.73 | 0.84            | -    | -        | -    | -                      | -   | -          | -   | -          | -    | -                       | -    | -             | -    | -                          | -    |                 |  |
| H2000CASES    | 497      | 49.8 | 10.5                   | 29.4 | 3.6        | 175.0 | 7.0        | 91.1 | 12.2                    | 25.3 | 5.4           | 11.5 | 10.0                       | 0.50 | 0.63            | 494  | 53.1     | 11.4 | 29.7                   | 4.8 | 161.0      | 7.0 | 76.5       | 13.5 | 36.2                    | 6.1  | 32.9          | 19.3 | 0.65                       | 0.65 |                 |  |
| H2000CTRLS    | 488      | 48.3 | 10.1                   | 25.3 | 3.0        | 175.0 | 7.0        | 78.0 | 10.1                    | 19.6 | 5.1           | 5.9  | 5.8                        | 0.53 | 0.65            | 544  | 51.3     | 11.4 | 24.9                   | 3.9 | 161.0      | 7.0 | 65.2       | 10.2 | 29.6                    | 6.5  | 19.1          | 15.0 | 0.67                       | 0.73 |                 |  |
| HBCS          | 696      | 61.4 | 2.8                    | 27.6 | 4.3        | 177.0 | 6.0        | 86.3 | 14.4                    | 23.8 | 6.0           | 13.7 | 16.6                       | 0.44 | 0.48            | 909  | 61.6     | 3.0  | 27.8                   | 5.1 | 163.0      | 6.0 | 74.0       | 13.8 | 34.0                    | 6.8  | 24.4          | 20.2 | 0.57                       | 0.59 |                 |  |
| Health ABC    | 291      | 73.8 | 2.9                    | 29.1 | 3.6        | 173.5 | 6.9        | 87.8 | 12.9                    | 32.6 | 4.5           | 13.3 | 8.6                        | 0.41 | 0.49            | 414  | 73.4     | 2.7  | 28.2                   | 4.1 | 159.6      | 5.8 | 71.8       | 11.0 | 42.8                    | 4.1  | 27.0          | 13.8 | 0.41                       | 0.55 |                 |  |
| HERITAGE      | 242      | 36.7 | 15.0                   | 26.7 | 4.9        | 178.0 | 6.0        | 84.7 | 16.3                    | 22.9 | 9.0           | 7.1  | 6.0                        | 0.80 | 0.88            | 244  | 35.1     | 14.1 | 25.0                   | 4.8 | 163.0      | 6.0 | 66.9       | 13.6 | 29.9                    | 9.9  | 18.3          | 13.5 | 0.78                       | 0.77 |                 |  |
| InCHIANTI     | 418      | 66.1 | 15.8                   | 27.1 | 3.4        | 167.0 | 8.0        | 75.8 | 12.0                    | -    | -             | 6.6  | 7.8                        | 0.59 | -               | 542  | 68.1     | 15.4 | 27.2                   | 4.6 | 154.3      | 7.3 | 64.8       | 11.2 | -                       | -    | 17.4          | 15.3 | 0.56                       | -    |                 |  |
| Inter99       | 2869     | 46.5 | 7.8                    | 26.7 | 4.0        | 178.8 | 6.9        | 85.5 | 14.0                    | -    | -             | 4.6  | 5.2                        | 0.61 | -               | 2961 | 45.8     | 8.0  | 25.8                   | 5.0 | 166.0      | 6.3 | 71.0       | 14.4 | -                       | -    | 15.1          | 16.2 | 0.66                       | -    |                 |  |
| KORA-F3       | 797      | 62.9 | 10.1                   | 28.2 | 3.8        | -     | -          | -    | -                       | 29.0 | 5.2           | 9.5  | 9.4                        | 0.70 | 0.76            | 820  | 62.1     | 10.1 | 28.0                   | 5.1 | -          | -   | -          | -    | 38.4                    | 6.8  | 30.7          | 26.1 | 0.78                       | 0.79 |                 |  |
| KORA-F4       | 428      | 68.9 | 4.5                    | 28.5 | 3.9        | -     | -          | -    | -                       | -    | -             | 10.7 | 12.2                       | 0.66 | -               | 412  | 68.7     | 4.2  | 28.9                   | 5.0 | -          | -   | -          | -    | -                       | 33.5 | 27.1          | 0.78 | -                          |      |                 |  |
| LLS           | 1033     | 59.9 | 6.7                    | 25.7 | 3.0        | -     | -          | -    | -                       | -    | -             | 10.2 | 12.1                       | 0.50 | -               | 1226 | 58.7     | 6.7  | 25.1                   | 3.9 | -          | -   | -          | -    | -                       | 29.1 | 24.8          | 0.67 | -                          |      |                 |  |
| LURIC         | 312      | 54.7 | 12.7                   | 27.4 | 3.8        | 176.7 | 7.0        | 85.4 | 12.9                    | -    | -             | 9.2  | 7.8                        | 0.60 | -               | 287  | 62.3     | 10.8 | 27.4                   | 4.8 | 162.6      | 6.6 | 72.4       | 13.6 | -                       | -    | 25.9          | 16.5 | 0.64                       | -    |                 |  |
| MESA          | 397      | 62.6 | 10.2                   | 28.2 | 4.0        | 176.8 | 6.9        | 88.1 | 14.2                    | -    | -             | 10.4 | 10.6                       | 0.51 | -               | 363  | 62.9     | 9.2  | 27.4                   | 5.7 | 162.8      | 6.5 | 72.9       | 16.2 | -                       | -    | 27.0          | 23.0 | 0.68                       | -    |                 |  |



| Study       | Men      |      |                        |      |            |       |            |      |                         |      |               |      |             |            | Women    |      |                        |      |            |      |            |      |                         |      |               |      |             |            |      |      |
|-------------|----------|------|------------------------|------|------------|-------|------------|------|-------------------------|------|---------------|------|-------------|------------|----------|------|------------------------|------|------------|------|------------|------|-------------------------|------|---------------|------|-------------|------------|------|------|
|             |          |      |                        |      |            |       |            |      |                         |      |               |      | Correlation |            |          |      |                        |      |            |      |            |      |                         |      |               |      | Correlation |            |      |      |
|             | Age, yrs |      | BMI, kg/m <sup>2</sup> |      | Height, cm |       | Weight, kg |      | Body fat percentage (%) |      | Leptin, ng/ml |      | vs. BMI     | vs. Leptin | Age, yrs |      | BMI, kg/m <sup>2</sup> |      | Height, cm |      | Weight, kg |      | Body fat percentage (%) |      | Leptin, ng/ml |      | vs. BMI     | vs. Leptin |      |      |
| n*          | mean     | SD   | mean                   | SD   | mean       | SD    | mean       | SD   | mean                    | SD   | mean          | SD   | r           | r          | n*       | mean | SD                     | mean | SD         | mean | SD         | mean | SD                      | mean | SD            | mean | SD          | r          | r    |      |
| MICROS      | 470      | 45.5 | 15.9                   | 26.1 | 3.9        | 173.0 | 7.0        | 78.4 | 13.0                    | -    | -             | 2.0  | 2.6         | 0.57       | -        | 627  | 45.9                   | 16.5 | 25.4       | 5.3  | 161.0      | 7.0  | 65.2                    | 13.2 | -             | -    | 7.0         | 9.1        | 0.66 | -    |
| MrOS Sweden | 919      | 75.3 | 3.2                    | 26.2 | 3.5        | 176.0 | 6.0        | 80.9 | 12.1                    | 22.7 | 4.8           | 22.7 | 21.1        | 0.63       | 0.77     | -    | -                      | -    | -          | -    | -          | -    | -                       | -    | -             | -    | -           | -          | -    | -    |
| NHS TZD     | -        | -    | -                      | -    | -          | -     | -          | -    | -                       | -    | -             | -    | -           | -          | -        | 1793 | 56.7                   | 6.9  | 28.4       | 5.9  | 163.6      | 9.1  | 74.8                    | 19.5 | -             | -    | 28.1        | 19.5       | 0.74 | -    |
| NHS CGEM    | -        | -    | -                      | -    | -          | -     | -          | -    | -                       | -    | -             | -    | -           | -          | -        | 336  | 58.6                   | 6.5  | 25.2       | 4.7  | 164.5      | 6.1  | 67.1                    | 15.1 | -             | -    | 22.0        | 16.1       | 0.71 | -    |
| PIVUS       | 474      | 70.1 | 0.2                    | 27.0 | 3.7        | 175.9 | 6.5        | 83.6 | 13.0                    | -    | -             | 8.0  | 5.7         | 0.70       | -        | 474  | 70.3                   | 0.2  | 27.1       | 4.9  | 162.2      | 5.6  | 71.3                    | 13.1 | -             | -    | 19.4        | 5.7        | 0.73 | -    |
| PROSPER     | 2475     | 75.0 | 3.3                    | 26.6 | 3.6        | 172.1 | 6.7        | 78.7 | 11.9                    | -    | -             | 2.1  | 0.7         | 0.65       | -        | 2673 | 75.7                   | 3.4  | 27.1       | 4.7  | 158.8      | 6.7  | 68.3                    | 12.7 | -             | -    | 3.1         | 0.8        | 0.70 | -    |
| QFS         | 254      | 43.7 | 16.2                   | 27.6 | 5.9        | 172.6 | 6.8        | 82.2 | 18.4                    | 23.1 | 8.6           | 9.1  | 7.8         | 0.68       | 0.71     | 329  | 43.8                   | 17.1 | 28.0       | 8.1  | 159.6      | 6.8  | 71.1                    | 20.6 | 32.4          | 10.0 | 25.7        | 18.9       | 0.73 | 0.74 |
| RISC        | 156      | 44.7 | 8.3                    | 26.0 | 3.5        | 178.6 | 7.3        | 83.0 | 12.4                    | 21.5 | 7.2           | 5.5  | 5.6         | 0.68       | 0.70     | 157  | 45.8                   | 7.9  | 25.2       | 4.5  | 164.9      | 6.7  | 68.6                    | 13.2 | 32.8          | 8.1  | 20.9        | 16.6       | 0.82 | 0.70 |
| Rotterdam   | 482      | 66.1 | 5.1                    | 26.7 | 2.8        | 177.1 | 5.8        | 83.7 | 9.9                     | -    | -             | 6.3  | 4.5         | 0.49       | -        | 486  | 66.8                   | 6.0  | 26.1       | 4.1  | 163.1      | 7.1  | 69.5                    | 11.9 | -             | -    | 21.1        | 17.5       | 0.68 | -    |
| TwinsUK     | -        | -    | -                      | -    | -          | -     | -          | -    | -                       | -    | -             | -    | -           | -          | -        | 2689 | 47.6                   | 12.5 | 25.0       | 4.5  | 162.4      | 6.1  | 65.8                    | 12.2 | 35.7          | 7.8  | 17.0        | 12.7       | 0.73 | 0.73 |
| WGHS        | -        | -    | -                      | -    | -          | -     | -          | -    | -                       | -    | -             | -    | -           | -          | -        | 808  | 54.6                   | 7.4  | 25.8       | 5.0  | 164.0      | 6.0  | 69.4                    | 14.5 | -             | -    | 23.0        | 17.1       | 0.70 | -    |
| YFS         | 941      | 31.7 | 5.0                    | 25.8 | 4.1        | 180.0 | 7.0        | 83.4 | 15.0                    | 16.1 | 6.2           | 5.5  | 4.3         | 0.72       | 0.81     | 1144 | 31.7                   | 5.0  | 24.5       | 4.6  | 166.0      | 6.0  | 67.8                    | 13.3 | 27.0          | 7.4  | 15.8        | 10.2       | 0.73 | 0.79 |

\* number of the individuals included in the leptin analyses

**Supplementary Table 24.** Information on genotyping methods, quality control of SNPs, imputation, and statistical analysis of the participating studies.

| Cohort             | Platform                                 | GENOTYPING                 |                        |            |                    | SNPs that met QC criteria | IMPUTATION          |                        |                      | Association analyses software |
|--------------------|------------------------------------------|----------------------------|------------------------|------------|--------------------|---------------------------|---------------------|------------------------|----------------------|-------------------------------|
|                    |                                          | Genotype calling algorithm | Inclusion criteria MAF | Call rate* | p for HWE          |                           | Imputation software | Inclusion criteria MAF | Imputation quality** |                               |
| <b>BLSA</b>        | Illumina 550K                            | Beadstudio                 | ≥ 1%                   | ≥ 99%      | > 10 <sup>-4</sup> | 498,838                   | MACH                | ≥1%                    | r2-hat ≥ 0.30        | Merlinoffline                 |
| <b>BWHHS</b>       | 50K HumanCVD BeadChip                    | GenCall                    | > 0%                   | ≥ 95%      | > 10 <sup>-7</sup> | 50,000                    | -                   | -                      | -                    | PLINK                         |
| <b>COLAUS</b>      | Affymetrix GeneChip Human Mapping 500K   | BRLMM                      | ≥ 1%                   | ≥ 70%      | > 10 <sup>-7</sup> | 390,631                   | IMPUTE              | -                      | proper-info ≥ 0.40   | In-house Matlab code          |
| <b>Ely Study</b>   | Illumina MetaboChip                      | GenCall                    | > 0%                   | ≥ 90%      | > 10 <sup>-6</sup> | 149,302                   | -                   | -                      | -                    | SAS                           |
| <b>ERF</b>         | Illumina 300K and 370K; Affymetrix 250K  | Beadstudio, blrmm          | ≥ 1%                   | ≥ 95.5%    | > 10 <sup>-6</sup> | 650,197                   | MACH                | ≥1%                    | r2-hat ≥ 0.30        | GenABEL/ProbABEL              |
| <b>FamHS</b>       | Illumina 550K, 610K, and 1M              | Bead Studio                | ≥ 1%                   | ≥ 98%      | > 10 <sup>-6</sup> | 499,558                   | MACH                | -                      | r2-hat ≥ 0.30        | Imekin R Package in           |
| <b>Fenland</b>     | Affymetrix SNP5.0                        | BRLMM                      | ≥ 1%                   | ≥ 90%      | > 10 <sup>-6</sup> | 362,055                   | IMPUTE              | ≥1%                    | proper-info ≥ 0.40   | SNPtest                       |
| <b>FINRISK97</b>   | Illumina Human 610-Quad                  | Illuminus                  | ≥ 5%                   | ≥ 95%      | > 10 <sup>-6</sup> | 554,988                   | MACH                | -                      | r2-hat ≥ 0.30        | ProbABEL                      |
| <b>GARP study</b>  | Illumina Human660W                       | Genome studio              | > 5%                   | > 98%      | > 10 <sup>-4</sup> | 510,865                   | IMPUTE              | >5%                    | proper-info ≥ 0.40   | QTASSOC In-house              |
| <b>GEMS</b>        | Affymetrix GeneChip Human Mapping 500K   | BRLMM                      | ≥1%                    | > 90%      | > 10 <sup>-6</sup> | 357,170                   | IMPUTE              | ≥1%                    | proper-info ≥ 0.40   | ProbABEL                      |
| <b>GLACIER</b>     | Illumina MetaboChip                      | Illuminus                  | ≥ 0%                   | ≥ 95%      | > 10 <sup>-6</sup> | 189,315                   | -                   | -                      | -                    | SAS                           |
| <b>GOOD</b>        | Illumina 610K                            | Bead Studio                | ≥ 1%                   | ≥ 98%      | > 10 <sup>-6</sup> | 521,160                   | MACH                | ≥1%                    | r2-hat ≥ 0.30        | PLINK                         |
| <b>GOYA Male</b>   | Illumina Human 610K-Quad                 | GenCall                    | ≥ 1%                   | ≥ 95%      | > 10 <sup>-7</sup> | 545,349                   | MACH                | ≥1%                    | r2-hat ≥ 0.30        | R                             |
| <b>H2000 CASES</b> | Illumina Human610-Quad                   | Illuminus                  | ≥ 5%                   | ≥ 95%      | > 10 <sup>-6</sup> | 555,388                   | MACH                | -                      | r2-hat ≥ 0.30        | ProbABEL                      |
| <b>H2000 CTRLS</b> | Illumina Human610-Quad                   | Illuminus                  | ≥ 5%                   | ≥ 95%      | > 10 <sup>-6</sup> | 555,388                   | MACH                | -                      | r2-hat ≥ 0.30        | ProbABEL                      |
| <b>HBCS</b>        | Illumina Human670-Quad                   | Illuminus                  | ≥ 5%                   | ≥ 95%      | > 10 <sup>-6</sup> | 533,491                   | MACH                | -                      | r2-hat ≥ 0.30        | ProbABEL                      |
| <b>Health ABC</b>  | Illumina 1M                              | GenomeStudio               | ≥ 1%                   | ≥ 95%      | > 10 <sup>-5</sup> | 899,818                   | MACH                | ≥1%                    | r2-hat ≥ 0.30        | MACH2                         |
| <b>HERITAGE</b>    | Illumina HumanCNV370-Quad v3.0           | Illumina Genome Studio     | ≥ 1%                   | ≥ 99%      | > 10 <sup>-6</sup> | 324,607                   | MACH                | ≥1%                    | r2-hat ≥ 0.30        | ProbABEL                      |
| <b>InCHIANTI</b>   | Illumina 550K                            | Beadstudio                 | ≥ 1%                   | ≥ 99%      | > 10 <sup>-6</sup> | 514,027                   | MACH                | ≥1%                    | r2-hat ≥ 0.30        | Merlinoffline                 |
| <b>Inter99</b>     | KASP Genotyping Assay (LGC Genomics, UK) | KlusterCaller              | ≥ 1%                   | ≥ 95%      | > 0.005            | 8                         | -                   | -                      | -                    | R                             |
| <b>Inter99</b>     | Illumina MetaboChip                      | GenCall                    | ≥ 1%                   | ≥ 95%      | > 10 <sup>-4</sup> | 118,622                   | -                   | -                      | -                    | PLINK/R                       |
| <b>KORA-F3</b>     | Affymetrix GeneChip Human Mapping 500K   | BRLMM                      | ≥ 1%                   | ≥ 95%      | > 10 <sup>-6</sup> | 379,392                   | IMPUTE              | -                      | proper-info ≥ 0.40   | SNPtest                       |
| <b>KORA-F4</b>     | Affymetrix 6.0 (1000K)                   | Birdseed2                  | -                      | -          | -                  | 909,622                   | IMPUTE              | -                      | proper-info ≥ 0.40   | SNPtest                       |

| Cohort              | Platform                                 | GENOTYPING                 |                        |            |                    |                           | IMPUTATION          |                        |                      | Association analyses software |
|---------------------|------------------------------------------|----------------------------|------------------------|------------|--------------------|---------------------------|---------------------|------------------------|----------------------|-------------------------------|
|                     |                                          | Genotype calling algorithm | Inclusion criteria MAF | Call rate* | p for HWE          | SNPs that met QC criteria | Imputation software | Inclusion criteria MAF | Imputation quality** |                               |
| LLS                 | Illumina 660W-Quad, Illumina OmniExpress | Beadstudio                 | ≥ 1%                   | ≥ 95%      | > 10 <sup>-4</sup> | 516,712                   | IMPUTE              | ≥1%                    | proper-info ≥ 0.40   | QTassoc                       |
| LURIC               | Affymetrix 6.0                           | Birdseed v2                | ≥ 1%                   | ≥ 98%      | > 10 <sup>-4</sup> | 686,195                   | MACH                | -                      | r2-hat ≥ 0.30        | QUICKTEST                     |
| MESA                | Affymetrix 6.0                           | Birdseed v1.33             | ≥ 1%                   | ≥ 95%      | > 10 <sup>-6</sup> | 881,666                   | IMPUTE2             | ≥1%                    | proper-info ≥ 0.40   | SNPtest2                      |
| MICROS              | Illumina CNV370, Illumina HumHap300v2    | Bead Studio                | >1%                    | ≥ 98%      | > 10 <sup>-6</sup> | 292,917                   | MACH                | ≥1%                    | r2-hat ≥ 0.30        | GeneABEL, ProbABEL            |
| MrOS Sweden         | Illumina 1M                              | Bead Studio                | ≥ 1%                   | ≥ 97%      | > 10 <sup>-4</sup> | 739,447                   | MINIMAC             | ≥1%                    | r2-hat ≥ 0.30        | PLINK                         |
| NHS T2D             | Affymetrix 6.0                           | Birdseed                   | >2%                    | ≥ 95%      | > 10 <sup>-4</sup> | 704,409                   | MACH                | >2%                    | r2-hat ≥ 0.30        | ProbABEL                      |
| NHS CGEM            | Illumina HumanHap550                     | Illumina Beadstudio        | >1%                    | ≥ 90%      | -                  | 528,173                   | MACH                | >2%                    | r2-hat ≥ 0.30        | ProbABEL                      |
| PIVUS               | Merged Metabochip and Omni Express       | GenCall                    | ≥ 1%                   | > 95%      | > 10 <sup>-6</sup> | 738,879                   | IMPUTE              | ≥1%                    | proper-info ≥ 0.40   | SNPtest                       |
| PROSPER             | Illumina 660K Quad                       | BeadStudio                 | -                      | > 97.5%    | > 10 <sup>-6</sup> | 557,192                   | MACH                | ≥1%                    | r2-hat ≥ 0.30        | ProbABEL                      |
| QFS                 | Illumina 610-Quad chip                   | Bead Studio Genotyping     | ≥ 1%                   | ≥ 95%      | > 10 <sup>-4</sup> | 543 173                   | MACH                | ≥1%                    | r2-hat ≥ 0.30        | GWAF                          |
| RISC                | Affymetrix 6.0                           | Birdseed                   | >1%                    | ≥98%       | > 10 <sup>-4</sup> | 747,423                   | MACH                | ≥1%                    | r2_hat ≥ 0.30        | MACH2QTL                      |
| Rotterdam Study+A19 | Illumina HumanHap 550                    | Beadstudio Genecall        | ≥ 1%                   | ≥ 97.5%    | > 10 <sup>-6</sup> | 512,349                   | MACH                | -                      | r2_hat ≥ 0.30        | MACH2QTL                      |
| TwinsUK             | Illumina HumanHap300+ Illumina 610K Quad | Illuminus                  | ≥ 1%                   | ≥ 97%      | > 10 <sup>-6</sup> | 303,940 (Hap300)          | IMPUTE              | ≥1%                    | proper-info ≥ 0.40   | GenABEL                       |
| WGHS                | Illumina HumanHap 300 DuoPlus            | Illumina BeadStudio 3.3    | ≥ 1%                   | ≥ 90%      | > 10 <sup>-6</sup> | 339,596                   | MACH                | ≥1%                    | r2-hat ≥ 0.30        | SAS                           |
| YFS                 | Illumina Human 670-Quad                  | Illuminus                  | ≥ 5%                   | ≥ 95%      | > 10 <sup>-6</sup> | 546,677                   | MACH                | -                      | r2-hat ≥ 0.30        | ProbABEL                      |

\* Call rate to exclude SNPs for which less than a certain percentage of individuals were successfully genotyped

\*\* Imputation quality filter used during the meta-analysis (proper\_info ≥ 0.40 for IMPUTE, r2-hat ≥ 0.30 for MACH, or INFO ≥ 0.8 for PLINK)

**Supplementary Table 25.** Primers used for qPCR.

| <b>Gene</b>                | <b>Forward primer</b>     | <b>Reverse primer</b>      |
|----------------------------|---------------------------|----------------------------|
| <b>Housekeeping genes</b>  |                           |                            |
| <i>Actb</i> ex2-3          | CGGGCTGTATCCCCTCCAT       | GGGCCTCGTCACCCACATAG       |
| <i>Rplp0</i> ex3-4         | ACCTCCTTCTCCAGGCTTTGG     | CGAAGGAGAAGGGGAGATGTT      |
| <i>Gapdh</i> ex2-3         | CTGGAGAAACCTGCCAAGTATGATG | GAGACAACCTGGTCTCAGTGTAGC   |
| <i>Ppia</i> ex2-3          | CTTCGAGCTGTTGCAGACAAAGTT  | GGAGGAACCCTTATAGCCAAATCCT  |
| <b>Lep /Fto loci</b>       |                           |                            |
| <i>Lep</i> ex1-2           | CGAGGAATCGTTCTGCAAATCC    | GCCAGGTTAAGTGCAGCTATCACA   |
| <i>Fto</i> ex1-2           | GGCGGCTTTAGTAGCAGCAT      | CCAAGTGTCTTAAGCTCCTC       |
| <i>Rpgrip1l</i> ex4-5      | CCAAACAGCAGCTCCAAGTCCAGGG | GAGCGTGGTGTACAGTTTCTGCTTC  |
| <b>Gckr locus</b>          |                           |                            |
| <i>Ucn</i> ex1-2           | TTGCACTGGGCAGACACTCC      | AGCTGTGCCAAGAGCAGCAA       |
| <i>Ppm1g</i> ex2-3         | CCATGGAGGATGCTCACAACCTG   | TTTGGCACAGTACAAGGCAACTG    |
| <i>Fndc4</i> ex3-4         | GGGACGTTCAGAAAGGCAAC      | AGGCCCTGGTGGTGGTGT         |
| <i>Zfp512</i> ex2-3        | GCAGAGGAGCACCAGGATCG      | CGAGCCACTCAGGGAGTCTCT      |
| <i>Mpv17</i> ex3-4         | GGGGTCTCCAGCAACACCAG      | GGTGCCCGGGATTAAGTGGT       |
| <i>Nrbp1</i> ex3-4         | CCTGGCCATGGATACAGAGGA     | TCAAACACTGCACGGACCTT       |
| <i>Gtf3c2</i> ex2-3        | GGAAAGCCTCACCAGGTTGG      | CGGAAGGCTTTGAGGCCCTA       |
| <i>lft172</i> ex13-14      | CATCAGCGTCCGTATCAATG      | CCAATGTTGTAGCCCAATC        |
| <i>Ccdc121</i> ex1-1       | AGGCGCACTTCCAGTTCCTG      | ATCTGCCCCAGTCCATCAG        |
| <i>Eif2b4</i> ex2-3        | AGGAAAAGGGGCGAGACCAA      | CCTCCCAGCTGACTACCAGGTC     |
| <i>Gckr</i> ex1-2          | GCCAAGCACCAAGCGGTATC      | CGGGTCAGTGGGTTGGACTT       |
| <i>Gpn1</i> ex2-3          | CTGTGCATGAAGTCCCCTTT      | GTTTGGCCCAAGTCCATATT       |
| <i>Krtcap3</i> ex2-3       | TCATTTCTGTGGGTTCCGGACT    | CAGTCGTGGGCGAAGAAGGT       |
| <i>Supt7l</i> ex2-3        | TTCCAGATCCGGCAGAGTGA      | GGATTGTGGCGACTGCTTGA       |
| <i>Slc4a1ap</i> ex1-2      | CAGCACTCGGCTCTTTATCC      | TGCTGCTGTTTACGCAATTC       |
| <b>Ccn11 locus</b>         |                           |                            |
| <i>Lekr1</i> (short) ex2-3 | CCCATGCATGCCTTACCTGA      | TGAAGAATTAGATAGCTGACGCCACA |
| <i>Ccn11</i> ex1-2         | AGACGGATCTGCGCATCTTG      | GAACCGATGGAACAGCACCTG      |
| <i>Tiparp</i> ex1-2        | CGTTCGAAGGGCGGCTTG        | CAGTCTGGCTCAGGTTCAAGTGG    |
| <b>Cobll1 locus</b>        |                           |                            |
| <i>Grb14</i> ex3-4         | TTGCCAGCTGTTGATCCTGAA     | TCAGTTGGCAGCTCGTGGTC       |
| <i>Cobll1</i> ex2-3        | AGTGGTCTGCCGGGAGATA       | GAGCACAGAGGAACACAGAGCA     |
| <i>Slc38a11</i> ex3-4      | GCAAGCTGGATTCCCTTGG       | TCCAGAGAGGGCTCCTCCTTTT     |
| <b>Slc32a1 locus</b>       |                           |                            |
| <i>Adig</i> ex1-2          | CGTGGCTTTGCTGCTGTCTT      | CTCCAGGGCTCCCAGTTGAA       |
| <i>Slc32a1</i> ex1-2       | AGTTCGGGGGTCACGACAAA      | TAGGGTAGGCCACAGCACGAA      |
| <i>Actr5</i> ex2-3         | GCGGCCTCATATTTATCC        | GCCAGCTGCCTGACTTCCTC       |
| <i>Ppp1r16b</i> ex1-2      | ACCACCAGCTGCGGCTCT        | GAGCACAGGGGCTCCCAAG        |
| <b>Additional primers</b>  |                           |                            |
| <i>Pparg2</i> ex2-4        | TTTGAAGAAGCGGTGAACCA      | CGAAGTTGGTGGGCCAGAAT       |

**Supplementary Table 26.** Imputation quality distribution for the leptin-associated loci.

| SNP       | Chr | Pos       | Nearby gene    | Imputation quality |      |      |      |      |
|-----------|-----|-----------|----------------|--------------------|------|------|------|------|
|           |     |           |                | 95%                | 75%  | 50%  | 25%  | 5%   |
| rs1048750 | 7   | 127647399 | <i>LEP</i>     | 1.00               | 1.00 | 0.95 | 0.93 | 0.91 |
| rs780093  | 2   | 27596107  | <i>GCKR</i>    | 1.00               | 1.00 | 1.00 | 1.00 | 0.94 |
| rs900400  | 3   | 158281469 | <i>CCNL1</i>   | 0.99               | 0.99 | 0.96 | 0.93 | 0.55 |
| rs6071166 | 20  | 36766426  | <i>SLC32A1</i> | 0.98               | 0.95 | 0.94 | 0.92 | 0.88 |
| rs6738627 | 2   | 165252696 | <i>COBLL1</i>  | 1.00               | 0.99 | 0.98 | 0.96 | 0.91 |
| rs8043757 | 16  | 52370951  | <i>FTO</i>     | 1.00               | 1.00 | 1.00 | 0.99 | 0.94 |

## Supplementary Note 1

### Acknowledgements

**BLSA:** The BLSA was supported by the Intramural Research Program of the NIH, National Institute on Aging.

**BWHHS:** The British Women Heart and Health Study is supported by British Heart Foundation programme grant no. PG/13/66/30442 and Department of Health Policy Research Programme (0090049). Genotype analysis in BWHHS was supported by the BHF (PG/07/131/24254) and UK Medical Research Council MC\_UU\_12013/8.

**COLAUS:** The CoLaus study received financial contributions from GlaxoSmithKline, the Faculty of Biology and Medicine of Lausanne, and the Swiss National Science Foundation (33CS30-122661, 33CS30-139468 and 33CS30-148401). The authors thank Vincent Mooser and Dawn Waterworth, Co-PIs of the CoLaus study. Special thanks to Murielle Bochud, Yolande Barreau, Mathieu Firmann, Vladimir Mayor, Anne-Lise Bastian, Binasa Ramic, Martine Moranville, Martine Baumer, Marcy Sagette, Jeanne Ecoffey and Sylvie Mermoud for data collection. S.B. is grateful for financial support from the Swiss National Science Foundation (Grant #3100AO-116323/1) and the Swiss Institute of Bioinformatics.

**Ely:** We are grateful to all the volunteers and to the staff of St. Mary's Street Surgery, Ely and the study team. The Ely Study was funded by the MRC (MC\_U106179471) and Diabetes UK. Genotyping in the Ely and Fenland studies was supported in part by an MRC-GlaxoSmithKline pilot programme grant (G0701863).

**ERF:** The genotyping for the ERF study was supported by EUROSPAN (European Special Populations Research Network) and the European Commission FP6 STRP grant (018947; LSHG-CT-2006-01947). The ERF study was further supported by grants from the Netherlands Organisation for Scientific Research, Erasmus MC, the Centre for Medical Systems Biology (CMSB) and the Netherlands Brain Foundation (HersenStichting Nederland). We are grateful to all participating individuals and their relatives, general practitioners and neurologists for their contributions and to P. Veraart for her help in genealogy, Jeannette Vergeer for the supervision of the laboratory work and P. Snijders for his help in data collection.

**Family Heart Study:** The Family Heart Study is funded by NHLBI grants 5R01HL068891, 5R01HL087700 and R01HL117078, and NIDDK grants 5R01DK068336, 5R01DK075681 and R01DK089256.

**Fenland:** The Fenland Study is funded by the Wellcome Trust and the Medical Research Council (MC\_U106179471). We are grateful to all the volunteers for their time and help, and to the General Practitioners and practice staff for assistance with recruitment. We thank the Fenland Study Investigators, Fenland Study Co-ordination team and the Epidemiology Field, Data and Laboratory teams.

**FINRISK97:** This study has been funded by the Academy of Finland (grant numbers 139635, 129494, 118065, 129322, 250207, 136895, 263836), the Orion-Farmos Research Foundation, the Finnish Foundation for Cardiovascular Research, and the Sigríd Jusélius Foundation. We are grateful for the THL DNA laboratory for its skillful work to produce the DNA samples used in this study. We thank the Sanger Institute genotyping facilities for genotyping the samples.

**GARP:** We thank all participants of the GARP study. The Leiden University Medical Centre, the Dutch Arthritis Association and Pfizer Inc., Groton, CT, USA support the GARP study, whilst genotypic work was supported by the Netherlands Organization of Scientific Research (MW 904-61-095, 911-03-016, 917 66344 and 911-03-012), Leiden University Medical Centre, and by the “Centre of Medical Systems Biology” and the “Netherlands Consortium of Healthy Aging” in the framework of the Netherlands Genomics Initiative (NGI). Furthermore, the research leading to these results has received funding from the Dutch Arthritis Association (DAA 2010\_017) and the European Union's Seventh Framework Programme (FP7/2007-2011) under grant agreement n° 259679.

**GEMS:** We acknowledge GEMS Study Investigators: Philip Barter, PhD; Antero Kesäniemi, PhD; Robert W. Mahley, PhD; Ruth McPherson, FRCP; Gerard Waeber MD; and Scott M. Grundy, PhD.

**GLACIER:** We thank the participants, health professionals and data managers involved in the Northern Swedish Health and Disease Study. We specifically thank John Hutiainen and Åsa Ågren (Umeå Medical Biobank) for data organization, and Kerstin Enquist and Thore Johansson (Västerbottens County Council) for expert technical assistance with DNA preparation. The GLACIER Study was funded by project grants from Novo Nordisk, the Swedish Heart-Lung Foundation, the Swedish Diabetes Association, Pålssons Foundation, the Swedish Research Council, Umeå University Career Development Award, and The Heart Foundation of Northern Sweden (all to P.W.F). F.R. was supported by a post-doctoral stipend from the Swedish Heart-Lung Foundation.

**GOOD:** Financial support was received from the Swedish Research Council, the Swedish Foundation for Strategic Research, the ALF/LUA research grant in Gothenburg, the Lundberg Foundation, the Torsten and Ragnar Söderberg's Foundation, the Novo Nordisk Foundation, and the European Commission grant HEALTH-F2-2008-201865-GEFOS.

**GOYA:** This study was conducted as part of the activities of the Gene-Diet Interactions in Obesity project (GENDINOB, [www.gendinob.dk](http://www.gendinob.dk)) and the MRC centre for Causal Analyses in Translational Epidemiology (MRC CAiTE). The data used in the present study is the ADIGEN subset of the GOYA-male cohort that underwent a thorough clinical-physiological examination, supported by the Danish Medical Research Council. We thank all the participants of the study. Tarunveer S. Ahluwalia received his Post Doctoral Fellowship from the GENDINOB project and acknowledges the same.

**Health2000:** This study has been funded by the Academy of Finland (grant numbers 129322 and 250207), the Orion-Farmos Research Foundation, the Finnish Foundation for Cardiovascular Research, and the Sigríd Jusélius Foundation. The Health 2000 Study was funded by the National Institute for Health and Welfare

(THL), the Finnish Centre for Pensions (ETK), the Social Insurance Institution of Finland (KELA), the Local Government Pensions Institution (KEVA) and other organizations listed on the website of the survey (<http://www.terveys2000.fi>). We are grateful for the THL DNA laboratory for its skillful work to produce the DNA samples used in this study. We thank the Sanger Institute genotyping facilities for genotyping the GenMets subcohort.

**HealthABC:** The Health ABC Study was supported by NIA contracts N01AG62101, N01AG62103, and N01AG62106 and, in part, by the NIA Intramural Research Program. The genome-wide association study was funded by NIA grant 1R01AG032098-01A1 to Wake Forest University Health Sciences and genotyping services were provided by the Center for Inherited Disease Research (CIDR). CIDR is fully funded through a federal contract from the National Institutes of Health to The Johns Hopkins University, contract number HHSN268200782096C. This study utilized the high-performance computational capabilities of the Biowulf Linux cluster at the National Institutes of Health, Bethesda, MD (<http://biowulf.nih.gov>).

**HBCS:** We thank all study participants as well as everybody involved in the Helsinki Birth Cohort Study. Helsinki Birth Cohort Study has been supported by grants from the Academy of Finland (130326, 134791, 263924), the Finnish Diabetes Research Society, Folkhälsan Research Foundation, Novo Nordisk Foundation, Finska Läkaresällskapet, Signe and Ane Gyllenberg Foundation, Ahokas Foundation, Emil Aaltonen Foundation, Juho Vainio Foundation, Finnish Foundation for Pediatric Research, Sigrid Juselius Foundation, the Finnish Special Governmental Subsidy for Health Sciences, Samfundet Folkhälsan, Liv och Hälsa, and Wellcome Trust (grant number WT089062). We are grateful for the THL DNA laboratory for its skillful work to produce the DNA samples used in this study. We thank the Sanger Institute genotyping facilities for genotyping the samples.

**HERITAGE:** We thank all PIs who contributed to the HERITAGE Family Study in the past via support from the National Heart, Lung, and Blood Institute (NHLBI) through the following grants: C Bouchard (HL-45670); AS Leon (HL-47323); DC Rao (HL-47317); JS Skinner (HL-47327); JH Wilmore (HL-47321).

**InCHIANTI:** The InCHIANTI study baseline (1998-2000) was supported as a "targeted project" (ICS110.1/RF97.71) by the Italian Ministry of Health and in part by the U.S. National Institute on Aging (Contracts: 263 MD 9164 and 263 MD 821336).

**INTER99:** The Novo Nordisk Foundation Center for Basic Metabolic Research is an independent research center at the University of Copenhagen partially funded by an unrestricted donation from the Novo Nordisk Foundation ([www.metabol.ku.dk](http://www.metabol.ku.dk)). The Inter99 study was initiated by Torben Jørgensen (PI), Knut Borch-Johnsen (co-PI), Hans Ibsen and Troels F. Thomsen. The steering committee comprises Torben Jørgensen (PI) and Charlotta Pisinger. The study was financially supported by research grants from the Danish Research Council, the Danish Centre for Health Technology Assessment, Novo Nordisk Inc., Research Foundation of Copenhagen County, Ministry of Internal Affairs and Health, the Danish Heart Foundation, the Danish Pharmaceutical Association, the Augustinus Foundation, the Ib Henriksen Foundation, the Becket Foundation, and the Danish Diabetes Association.



**KORA:** We thank all members of the field staff involved in the KORA study and we express our appreciation to all study participants. We thank the KORA Study Group consisting of A. Peters (speaker), J. Heinrich, R. Holle, R. Leidl, C. Meisinger, K. Strauch, and their co-workers, who are responsible for the design and conduct of the KORA studies. The KORA research platform (KORA, Cooperative Research in the Region of Augsburg) was initiated and financed by the Helmholtz Zentrum München - German Research Center for Environmental Health, which is funded by the German Federal Ministry of Education and Research and by the State of Bavaria. Furthermore, KORA research was supported within the Munich Center of Health Sciences (MC Health), Ludwig-Maximilians-Universität, as part of LMUinnovativ. This study was supported in part by a grant from the German Federal Ministry of Education and Research (BMBF) to the German Center for Diabetes Research (DZD e.V.).

**LLS:** The research leading to these results has received funding from the European Union's Seventh Framework Programme (FP7/2007-2011) under grant agreement number 259679. This study was financially supported by the Innovation-Oriented Research Program on Genomics (SenterNovem IGE05007), the Centre for Medical Systems Biology and the Netherlands Consortium for Healthy Ageing (grant 050-060-810), all in the framework of the Netherlands Genomics Initiative, Netherlands Organization for Scientific Research (NWO), by Unilever Colworth and by BBMRI-NL, a Research Infrastructure financed by the Dutch government (NWO 184.021.007).

**LURIC:** We extend our appreciation to the participants of the LURIC study; without their collaboration, this article would not have been written. We thank the LURIC study team who were either temporarily or permanently involved in patient recruitment as well as sample and data handling, in addition to the laboratory staff at the Ludwigshafen General Hospital and the Universities of Freiburg and Ulm, Germany. This work was supported by the 7th Framework Program (integrated project AtheroRemo, grant agreement number 201668 and RiskyCAD, grant agreement number 305739) of the European Union and, by the INTERREG IV Oberrhein Program (Project A28, Genetic mechanisms of cardiovascular diseases) with support from the European Regional Development Fund (ERDF) and the Wissenschaftsoffensive TMO.

**MESA:** MESA and the MESA SHARe project are conducted and supported by the National Heart, Lung, and Blood Institute (NHLBI) in collaboration with MESA investigators. Support for MESA is provided by contracts N01-HC-95159, N01-HC-95160, N01-HC-95161, N01-HC-95162, N01-HC-95163, N01-HC-95164, N01-HC-95165, N01-HC-95166, N01-HC-95167, N01-HC-95168, N01-HC-95169, UL1-TR-001079, and UL1-TR-000040. Funding for SHARe genotyping was provided by NHLBI Contract N02-HL-64278. Genotyping was performed at Affymetrix (Santa Clara, California, USA) and the Broad Institute of Harvard and Massachusetts Institute of Technology (Boston, Massachusetts, USA) using the Affymetrix Genome-Wide Human SNP Array 6.0. Additional support was provided by R01-HL-088451. Leptin assays were funded by 1R01DK080015.

**MICROS:** For the MICROS study, we thank the primary care practitioners Raffaella Stocker, Stefan Waldner, Toni Pizzocco, Josef Plangger, Ugo Marcadent, and the personnel of the Hospital of Silandro (Department of Laboratory Medicine) for their participation and collaboration in the research project. The MICROS study was supported by the Ministry of Health and Department of Educational Assistance, University and

Research of the Autonomous Province of Bolzano, the South Tyrolean Sparkasse Foundation, and the European Union framework program 6 EUROSPAN project (contract no. LSHG-CT-2006-018947).

**MrOS Sweden:** Financial support was received from the Swedish Research Council, the Swedish Foundation for Strategic Research, the ALF/LUA research grant in Gothenburg, the Lundberg Foundation, the Torsten and Ragnar Söderberg's Foundation, the Novo Nordisk Foundation, and the European Commission grant HEALTH-F2-2008-201865-GEFOS.

**MuTHER:** The MuTHER Study was funded by a program grant from the Wellcome Trust (081917/Z/07/Z) and by core funding from the Wellcome Trust Centre for Human Genetics (090532). Additional funding came from Wellcome Trust and European Community's Seventh Framework Programme (FP7/2007-2013). The study also received support from the National Institute for Health Research (NIHR) Clinical Research Facility at Guy's & St. Thomas', National Health Service (NHS) Foundation Trust and NIHR Biomedical Research Centre at Guy's and St. Thomas' NHS Foundation Trust and King's College London. Genotyping was performed by the Wellcome Trust Sanger Institute and the National Eye Institute via a National Institutes of Health (NIH) project grant.

**NHS:** This research was supported by NIH grants HG004399, HG004446, CA087969, CA055075, DK058845, CA65725, CA49449, CA67262, CA50385, and UO1CA098233. Qi Sun was supported by a career development award (R00HL098459) from the NHLBI.

**PIVUS:** This research was supported by funding from the Swedish Heart-Lung Foundation (20140422), Knut and Alice Wallenberg Foundation, Swedish Diabetes Foundation (grant no. 2013-024), Swedish Research Council (grant no. 2012-1397), and Göran Gustafsson Foundation. APM is a Wellcome Trust Senior Research Fellow and acknowledges funding from the Wellcome Trust under awards WT098017, WT090532 and WT064890. C.M.L. is a Wellcome Trust Research Career Development Fellow (086596/Z/08/Z) and acknowledges funding from the Li Ka Shing Foundation.

**PROSPER:** The PROSPER study was supported by an investigator initiated grant obtained from Bristol-Myers Squibb. Prof. Dr. J. W. Jukema is an Established Clinical Investigator of the Netherlands Heart Foundation (grant 2001 D 032). Support for genotyping was provided by the seventh framework program of the European commission (grant 223004) and by the Netherlands Genomics Initiative (Netherlands Consortium for Healthy Aging grant 050-060-810).

**QFS:** The Quebec Family Study was funded by multiple grants from the Medical Research Council of Canada and the Canadian Institutes for Health Research. This work was supported by a team grant from the Canadian Institutes of Health Research (FRCN-CCT-83028).

**RISC:** The RISC Study was supported by European Union grant QLG1-CT-2001-01252 and AstraZeneca. David B. Savage acknowledges funding from the Wellcome Trust (grant no 091551). Tim Frayling is supported by the European Research Council grant 323195:GLUCOSEGENES-FP7-IDEAS-ERC.

**Rotterdam Study:** The generation and management of GWAS genotype data for the Rotterdam Study (RS I, RS II, RS III) was executed by the Human Genotyping Facility of the Genetic Laboratory of the Department of Internal Medicine, Erasmus MC, Rotterdam, The Netherlands. The GWAS datasets are supported by the Netherlands Organisation of Scientific Research NWO Investments (nr. 175.010.2005.011, 911-03-012), the Genetic Laboratory of the Department of Internal Medicine, Erasmus MC, the Research Institute for Diseases in the Elderly (014-93-015; RIDE2), the Netherlands Genomics Initiative (NGI)/Netherlands Organisation for Scientific Research (NWO) Netherlands Consortium for Healthy Aging (NCHA), project nr. 050-060-810. We thank Pascal Arp, Mila Jhamai, Marijn Verkerk, Lizbeth Herrera and Marjolein Peters, MSc, and Carolina Medina-Gomez, MSc, for their help in creating the GWAS database, and Karol Estrada, PhD, Yurii Aulchenko, PhD, and Carolina Medina-Gomez, MSc, for the creation and analysis of imputed data. The Rotterdam Study is funded by Erasmus Medical Center and Erasmus University, Rotterdam, the Netherlands Organization for the Health Research and Development (ZonMw), the Research Institute for Diseases in the Elderly (RIDE), the Ministry of Education, Culture and Science, the Ministry for Health, Welfare and Sports, the European Commission (DG XII), and the Municipality of Rotterdam. The authors are grateful to the study participants, the staff from the Rotterdam Study and the participating general practitioners and pharmacists.

**TwinsUK:** The study was funded by the Wellcome Trust; European Community's Seventh Framework Programme (FP7/2007-2013). The study also receives support from the National Institute for Health Research (NIHR) BioResource Clinical Research Facility and Biomedical Research Centre based at Guy's and St Thomas', NHS Foundation Trust and King's College London. Brent Richards is funded by the CIHR, MDEIE, FRSQ and CFI. SNP Genotyping was performed by The Wellcome Trust Sanger Institute and National Eye Institute via NIH/CIDR.

**WGHS:** The WGHS is supported by HL043851 and HL080467 from the National Heart, Lung, and Blood Institute and CA047988 from the National Cancer Institute and the Donald W. Reynolds Foundation, with collaborative scientific support and funding for genotyping provided by Amgen. Leptin measures were funded by an investigator-initiated grant from Roche Pharmaceuticals to PMR.

**Young Finns:** The Young Finns Study has been financially supported by the Academy of Finland: grants 286284 (T.L.), 134309 (Eye), 126925, 121584, 124282, 129378 (Salve), 117787 (Gendi), and 41071 (Skidi); the Social Insurance Institution of Finland; Kuopio, Tampere and Turku University Hospital Medical Funds (grant X51001 for T.L.); Juho Vainio Foundation; Paavo Nurmi Foundation; Finnish Foundation of Cardiovascular Research (T.L.); Finnish Cultural Foundation; Tampere Tuberculosis Foundation (T.L.); Emil Aaltonen Foundation (T.L.); and Yrjö Jahnsson Foundation (T.L.). We gratefully acknowledge the THL DNA laboratory for its skillful work to produce the DNA samples used in this study, and Ville Aalto and Irina Lisinen for the expert technical assistance in the statistical analyses.

**Other acknowledgements:** This work was supported in part through the computational resources and staff expertise provided by the Department of Scientific Computing at the Icahn School of Medicine at Mount Sinai. Tuomas O. Kilpeläinen was supported by the Danish Council for Independent Research (DFF – 1333-00124 and Sapere Aude program grant DFF – 1331-00730B). Robert J. Klein was supported by the NHGRI

grant U01-HG007033. Tune H Pers is funded by The Lundbeck Foundation. Data on the childhood obesity trait has been contributed by EGG Consortium and has been downloaded from [www.egg-consortium.org](http://www.egg-consortium.org). Data on glycaemic traits have been contributed by MAGIC investigators and have been downloaded from [www.magicinvestigators.org](http://www.magicinvestigators.org). This research was conducted prior to Ms. Garcia's current affiliation with the National Heart, Lung, and Blood Institute. As such, the views expressed in this article do not necessarily represent the views of the National Heart, Lung, and Blood Institute, National Institutes of Health, or any other government entity.

## Supplementary References

1. Shock, N.W. *et al.* Normal Human Aging: The Baltimore Study of Aging. *NIH Publication No. 84-2540* (1984).
2. Firmann, M. *et al.* The CoLaus study: a population-based study to investigate the epidemiology and genetic determinants of cardiovascular risk factors and metabolic syndrome. *BMC Cardiovasc Disord* **8**, 6 (2008).
3. Aulchenko, Y.S. *et al.* Linkage disequilibrium in young genetically isolated Dutch population. *Eur J Hum Genet* **12**, 527-34 (2004).
4. Broer, L. *et al.* Association of adiponectin and leptin with relative telomere length in seven independent cohorts including 14,448 participants. *Eur J Epidemiol* **29**, 629-38 (2014).
5. Higgins, M. *et al.* NHLBI Family Heart Study: objectives and design. *Am J Epidemiol* **143**, 1219-28 (1996).
6. Ma, D. *et al.* Leptin is associated with blood pressure and hypertension in women from the National Heart, Lung, and Blood Institute Family Heart Study. *Hypertension* **53**, 473-9 (2009).
7. Rolfe Ede, L. *et al.* Association between birth weight and visceral fat in adults. *Am J Clin Nutr* **92**:347-52 (2010).
8. Willer, C.J. *et al.* Six new loci associated with body mass index highlight a neuronal influence on body weight regulation. *Nat Genet* **41**, 25-34 (2009).
9. Blankenberg, S. *et al.* Contribution of 30 biomarkers to 10-year cardiovascular risk estimation in 2 population cohorts: the MONICA, risk, genetics, archiving, and monograph (MORGAM) biomarker project. *Circulation* **121**, 2388-97 (2010).
10. Stimadel, H. *et al.* Genetic and phenotypic architecture of metabolic syndrome-associated components in dyslipidemic and normolipidemic subjects: the GEMS Study. *Atherosclerosis* **197**, 868-76 (2008).
11. Lorentzon, M. *et al.* Free testosterone is a positive, whereas free estradiol is a negative, predictor of cortical bone size in young Swedish men: the GOOD study. *J Bone Miner Res* **20**, 1334-41 (2005).
12. Aromaa, A., Koskinen, S. Health and functional capacity in Finland. Baseline results of the Health 2000 Health Examination Survey. *Publications of the National Public Health Institute* **B12/2004**
13. Eriksson, J.G. Early growth and adult health outcomes—lessons learned from the Helsinki Birth Cohort Study. *Matern Child Nutr* **1**, 149-54 (2005).
14. Bouchard, C. *et al.* The HERITAGE Family Study. Aims, design and measurement protocol. *Med Sci Sports Exerc* **27**, 721-9 (1995).

15. Ferrucci, L. *et al.* Subsystems contributing to the decline in ability to walk: bridging the gap between epidemiology and geriatric practice in the InCHIANTI study. *J Am Geriatr Soc* **48**, 1618-25 (2000).
16. Holle, R. *et al.* KORA—a research platform for population based health research. *Gesundheitswesen* **67 Suppl 1**, S19-25 (2005).
17. Pattaro, C. *et al.* The genetic study of three population microisolates in South Tyrol (MICROS): study design and epidemiological perspectives. *BMC Med Genet* **8**, 29 (2007).
18. Sun, Q. *et al.* Leptin and soluble leptin receptor levels in plasma and risk of type 2 diabetes in U.S. Women: A Prospective Study. *Diabetes* **59**, 611-8 (2010).
19. Sun, Q. *et al.* Genome-wide association study identifies polymorphisms in LEPR as determinants of plasma soluble leptin receptor levels. *Hum Mol Genet* **20**, 1846-55 (2010).
20. Hunter, D.J. *et al.* A genome-wide association study identifies alleles in FGFR2 associated with risk of sporadic postmenopausal breast cancer. *Nat Genet* **39**, 870-4 (2007).
21. Rice, T. *et al.* Familial resemblance for plasma leptin: sample homogeneity across adiposity and ethnic groups. *Obes Res* **10**, 351-60 (2002).
22. Hill, S.A. *et al.* The EGIR-RISK STUDY (The European group for the study of insulin resistance: relationship between insulin sensitivity and cardiovascular disease risk): I. Methodology and objectives. *Diabetologia* **47**, 566-70 (2004).
23. Finucane, F.M. *et al.* Correlation of the leptin:adiponectin ratio with measures of insulin resistance in non-diabetic individuals. *Diabetologia* **52**, 2345-9 (2009).
24. Estrada, K. *et al.* GRIMP: a web- and grid-based tool for high-speed analysis of large-scale genome-wide association using imputed data. *Bioinformatics* **25**, 2750-2 (2009).
25. Hofman, A. *et al.* The Rotterdam Study: 2012 objectives and design update. *Eur J Epidemiol* **26**, 657-86 (2011).
26. Hofman, A. *et al.* Determinants of disease and disability in the elderly: the Rotterdam Elderly Study. *Eur J Epidemiol* **7**, 403-22 (1991).
27. Moayyeri, A. *et al.* The UK Adult Twin Registry. *Twin Res Hum Genet* **16**, 144-9 (2013).
28. Raitakari, O.T. *et al.* Cohort profile: the cardiovascular risk in Young Finns Study. *Int J Epidemiol* **37**, 1220-6 (2008).
29. Lawlor, D.A. *et al.* Leptin and coronary heart disease risk: prospective case control study of British women. *Obesity* **15**:1694-701 (2007).
30. Forouhi, N.G. *et al.* Incidence of type 2 diabetes in England and its association with baseline impaired fasting glucose: the Ely study 1990-2000. *Diabet Med* **24**, 200-7 (2007).
31. Riyazi, N. *et al.* Evidence for familial aggregation of hand, hip, and spine but not knee osteoarthritis in siblings with multiple joint involvement: the GARP study. *Ann Rheum Dis* **64**, 438-43 (2005).
32. Yusuf, E. *et al.* Association between leptin, adiponectin and resistin and long-term progression of hand osteoarthritis. *Ann Rheum Dis* **70**, 1282-4 (2011).
33. Renström, F. *et al.* Genetic predisposition to long-term nondiabetic deteriorations in glucose homeostasis: Ten-year follow-up of the GLACIER study. *Diabetes* **60**, 345-54 (2011).
34. Kurbasic, A. *et al.* Gene-lifestyle interactions in complex diseases: Design and description of the GLACIER and VIKING studies. *Curr Nutr Rep* **3**, 400-411 (2014).
35. Paternoster, L. *et al.* Genome-wide population-based association study of extremely overweight young adults—the GOYA study. *PLoS One* **6**, e24303 (2011).

36. Winkelmann, B.R. *et al.* Rationale and design of the LURIC study—a resource for functional genomics, pharmacogenomics and long-term prognosis of cardiovascular disease. *Pharmacogenomics* **2(1 Suppl 1)**, S1-73 (2001).
37. Bild, D.E. *et al.* Multi-ethnic study of atherosclerosis: objectives and design. *Am J Epidemiol* **156**, 871-81 (2002).
38. Rasmussen-Torvik, L.J. *et al.* Associations of body mass index and insulin resistance with leptin, adiponectin, and the leptin-to-adiponectin ratio across ethnic groups: the Multi-Ethnic Study of Atherosclerosis (MESA). *Ann Epidemiol* **22**, 705-9 (2012).
39. Mellström D, *et al.* Free testosterone is an independent predictor of BMD and prevalent fractures in elderly men: MrOS Sweden. *J Bone Miner Res* **21**, 529-35 (2006).
40. Lind, L. *et al.* A comparison of three different methods to determine arterial compliance in the elderly: the Prospective Investigation of the Vasculature in Uppsala Seniors (PIVUS) study. *J Hypertens* **24**, 1075-82 (2006).
41. Welsh, P. *et al.* Unraveling the directional link between adiposity and inflammation: a bidirectional Mendelian randomization approach. *J Clin Endocrinol Metab* **95**, 93-9 (2010).
42. Locke, A.E. *et al.* Genetic studies of body mass index yield new insights for obesity biology. *Nature* **518**, 197-206 (2015)
43. Shungin, D. *et al.* New genetic loci link adipose and insulin biology to body fat distribution. *Nature* **518**, 187-96 (2015)
44. Wood, A.R. *et al.* Defining the role of common variation in the genomic and biological architecture of adult human height. *Nat Genet* **46**, 1173-86 (2014)
45. Lu Y., *et al.* New loci for body fat percentage reveal link between adiposity and cardiometabolic disease risk. *Nat Commun* [in press] (2015)
46. Manning, A.K. *et al.* A genome-wide approach accounting for body mass index identifies genetic variants influencing fasting glycemic traits and insulin resistance. *Nat Genet* **44**, 659-69 (2012)
47. Willer, C. J. *et al.* Discovery and refinement of loci associated with lipid levels. *Nat Genet* **45**, 1274-83 (2013)
48. Ehret, G.B. *et al.* Genetic variants in novel pathways influence blood pressure and cardiovascular disease risk. *Nature* **478**, 103-9 (2011)
49. Horikoshi, M. *et al.* New loci associated with birth weight identify genetic links between intrauterine growth and adult height and metabolism. *Nat Genet* **45**, 76-82 (2013)
50. Dastani, Z. *et al.* Novel loci for adiponectin levels and their influence on type 2 diabetes and metabolic traits: a multi-ethnic meta-analysis of 45,891 individuals. *PLoS Genet* **8**, e1002607 (2012)
51. Perry, J.R. *et al.* Parent-of-origin-specific allelic associations among 106 genomic loci for age at menarche. *Nature* **514**, 92-7 (2014)
52. Dehghan, A. *et al.* Meta-analysis of genome-wide association studies in >80,000 subjects identifies multiple loci for C-reactive protein levels. *Circulation* **123**, 731-8 (2011)
53. Tanaka, T. *et al.* Genome-wide meta-analysis of observational studies shows common genetic variants associated with macronutrient intake. *Am J Hum Genet* **97**, 1395-402 (2013).
54. Wheeler, E. *et al.* Genome-wide SNP and CNV analysis identifies common and low-frequency variants associated with severe early-onset obesity. *Nat Genet* **45**, 513-7 (2013).
55. Morris, A.P. *et al.* Large-scale association analysis provides insights into the genetic architecture and pathophysiology of type 2 diabetes. *Nat Genet* **44**, 981-90 (2012).

56. Zhong, H. *et al.* Integrating pathway analysis and genetics of gene expression for genome-wide association studies. *Am J Hum Genet* **86**, 581-91 (2010).
57. Myers, A.J. *et al.* A survey of genetic human cortical gene expression. *Nat Genet* **39**, 1494-9 (2007).
58. Min, J.L. *et al.* Coexpression network analysis in abdominal and gluteal adipose tissue reveals regulatory genetic loci for metabolic syndrome and related phenotypes. *PLoS Genet* **8**, e1002505 (2012).
59. Grundberg,, E. *et al.* Mapping cis- and trans-regulatory effects across multiple tissues in twins. *Nat Genet* **44**, 1084-9 (2012).
